# Supplementary material for: Effects of a video intervention on physicians’ acceptance of pain apps: a randomised controlled trial
Source: PubMed Central journal article supplement — BMJ Open. 2022 Apr 25;12(4):e060020. doi: 10.1136/bmjopen-2021-060020 (PMC9039411; doi:10.1136/bmjopen-2021-060020), 2022-04-25
Supplement: bmjopen-2021-060020.draft_revisions.pdf [file bmjopen-2021-060020.draft_revisions.pdf]

# BMJ Open

BMJ Open is committed to open peer review. As part of this commitment we make the peer review history of every article we publish publicly available.

When an article is published we post the peer reviewers' comments and the authors' responses online. We also post the versions of the paper that were used during peer review. These are the versions that the peer review comments apply to.

The versions of the paper that follow are the versions that were submitted during the peer review process. They are not the versions of record or the final published versions. They should not be cited or distributed as the published version of this manuscript.

BMJ Open is an open access journal and the full, final, typeset and author-corrected version of record of the manuscript is available on our site with no access controls, subscription charges or pay-per-view fees (<http://bmjopen.bmj.com>).

If you have any questions on BMJ Open's open peer review process please email [info.bmjopen@bmj.com](mailto:info.bmjopen@bmj.com)

# BMJ Open

## A(pp)ceptance - Increasing physicians' acceptance for chronic pain apps: A randomized controlled trial

|                               |                                                                                                                                                                                                                                                                                                                                                                                                           |
|-------------------------------|-----------------------------------------------------------------------------------------------------------------------------------------------------------------------------------------------------------------------------------------------------------------------------------------------------------------------------------------------------------------------------------------------------------|
| Journal:                      | <i>BMJ Open</i>                                                                                                                                                                                                                                                                                                                                                                                           |
| Manuscript ID                 | bmjopen-2021-060020                                                                                                                                                                                                                                                                                                                                                                                       |
| Article Type:                 | Original research                                                                                                                                                                                                                                                                                                                                                                                         |
| Date Submitted by the Author: | 09-Dec-2021                                                                                                                                                                                                                                                                                                                                                                                               |
| Complete List of Authors:     | Hein, Hauke; University of Marburg, Department of Clinical Psychology and Psychotherapy<br>Glombiewski, Julia Anna; University Koblenz - Landau, Department of Psychology, Pain and Psychotherapy Research Lab<br>Rief, Winfried; University of Marburg, Department of Clinical Psychology and Psychotherapy<br>Riecke, Jenny; University of Marburg, Department of Clinical Psychology and Psychotherapy |
| Keywords:                     | PAIN MANAGEMENT, MEDICAL EDUCATION & TRAINING, EDUCATION & TRAINING (see Medical Education & Training)                                                                                                                                                                                                                                                                                                    |
|                               |                                                                                                                                                                                                                                                                                                                                                                                                           |

SCHOLARONE™  
Manuscripts

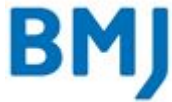

I, the Submitting Author has the right to grant and does grant on behalf of all authors of the Work (as defined in the below author licence), an exclusive licence and/or a non-exclusive licence for contributions from authors who are: i) UK Crown employees; ii) where BMJ has agreed a CC-BY licence shall apply, and/or iii) in accordance with the terms applicable for US Federal Government officers or employees acting as part of their official duties; on a worldwide, perpetual, irrevocable, royalty-free basis to BMJ Publishing Group Ltd ("BMJ") its licensees and where the relevant Journal is co-owned by BMJ to the co-owners of the Journal, to publish the Work in this journal and any other BMJ products and to exploit all rights, as set out in our [licence](#).

The Submitting Author accepts and understands that any supply made under these terms is made by BMJ to the Submitting Author unless you are acting as an employee on behalf of your employer or a postgraduate student of an affiliated institution which is paying any applicable article publishing charge ("APC") for Open Access articles. Where the Submitting Author wishes to make the Work available on an Open Access basis (and intends to pay the relevant APC), the terms of reuse of such Open Access shall be governed by a Creative Commons licence – details of these licences and which [Creative Commons](#) licence will apply to this Work are set out in our licence referred to above.

Other than as permitted in any relevant BMJ Author's Self Archiving Policies, I confirm this Work has not been accepted for publication elsewhere, is not being considered for publication elsewhere and does not duplicate material already published. I confirm all authors consent to publication of this Work and authorise the granting of this licence.

**Title**

A(pp)ceptance - Increasing physicians' acceptance for chronic pain apps: A randomized controlled trial

**Corresponding author**

Jenny Riecke  
Gutenbergstraße 18  
Marburg, 35032  
jenny.riecke@staff.uni-marburg.de

**Authors**

Hauke Jeldrik Hein  
Department of Clinical Psychology and Psychotherapy, Philipps-University Marburg

Julia Anna Glombiewski  
Department of Psychology, Pain and Psychotherapy Research Lab, University of Koblenz-Landau

Winfried Rief  
Department of Clinical Psychology and Psychotherapy, Philipps-University Marburg

Jenny Riecke  
Department of Clinical Psychology and Psychotherapy, Philipps-University Marburg

**Word count**

3484

**Keywords**

mHealth; health apps; acceptance; performance expectancy; credibility; chronic pain; physicians

**Abstract****Objectives**

The aim of our study was to determine and enhance physicians' acceptance, performance expectancy and credibility of health apps for chronic pain patients. We further investigated predictors of acceptance.

**Design**

Randomized experimental trial with a parallel-group repeated measures design.

**Setting and participants**

248 physicians working in various, mainly outpatient settings in Germany.

**Intervention and outcome**

Physicians were randomly assigned to either an experimental group (short video about health apps) or a control group (short video about chronic pain). Primary outcome measure was acceptance. Performance expectancy and the credibility of health apps were secondary outcomes. In addition, we assessed 101 medical students to evaluate the effectiveness of the video intervention in young professionals.

**Results**

In general, physicians' acceptance of health apps for chronic pain patients was moderate ( $M=9.51$ ,  $SD=3.53$ , scale ranges from 3-15). All primary and secondary outcomes were enhanced by the video intervention: A repeated-measures ANOVA yielded a significant interaction effect for acceptance ( $F(1, 246)=15.28$ ,  $p=.01$ ), performance expectancy ( $F(1, 246)=6.10$ ,  $p=.01$ ) and credibility ( $F(1, 246)=25.61$ ,  $p<.001$ ). The same pattern of results was evident among medical students.

Linear regression analysis revealed credibility ( $\beta=.34$ ,  $p<.001$ ) and performance expectancy ( $\beta .30$ ,  $p<.001$ ) as the two strongest factors influencing acceptance, followed by skepticism ( $\beta=-.18$ ,  $p<.001$ ) and intuitive appeal ( $\beta=.11$ ,  $p=.03$ ).

**Conclusions and recommendations**

Physicians' acceptance of health apps was moderate, and was strengthened by a three minutes video. Besides performance expectancy, credibility seems to be a promising factor associated with acceptance. Future research should focus on ways to implement acceptability-increasing interventions into routine care.

**Trial registration:** <https://osf.io/x693r>

**Strengths and limitations of this study**

- This is the first study to examine physicians' acceptance and expectations about health apps for chronic pain.

- 1 - A strength of the study is the investigation of both practitioners and medical students as
- 2 future physicians.
- 3 - Additional to the pure assessment of physicians' attitudes, their acceptance was
- 4 manipulated by a short video intervention within a pre-post design.
- 5 - A limitation is the online-only data collection, due to which a selection bias may have
- 6 occurred.
- 7
- 8
- 9
- 10
- 11
- 12

## 13 INTRODUCTION

14 Since the Global Burden of Disease Study was first conducted in the 1990s, chronic pain  
15 has been identified as the leading cause of years lived with disability[1]. Chronic pain has  
16 various negative health consequences and adverse impacts on quality of life[2–4].  
17 Although there are effective treatments for chronic pain[5,6], effect sizes tend to be  
18 small[7]. Further, the sustained efficacy of treatments is uncertain[8]. This is problematic,  
19 because chronic pain raises costs dramatically for health care systems[9,10] and is a  
20 significant contributor to work disability[11]. The likelihood of returning to work  
21 correlates with the duration of pain: the longer patients are out of work, the less likely they  
22 are to return to full-time employment[12,13]. Therefore, the principle for treating pain is  
23 that it should start as early as possible. However, many people, especially in rural areas,  
24 have no access to adequate pain treatment[14,15], even though it is considered a human  
25 right[16].

26  
27  
28  
29  
30  
31 Electronic health (eHealth) offerings can help to alleviate these problems and provide  
32 patients with evidence-based interventions[17]. Smartphone apps, falling under the mobile  
33 health (mHealth) category, especially have great potential for both practitioners and  
34 patients[18]: First, they can help patients better manage their pain, for example as a  
35 treatment adjunct or in the absence of a pain expert[19,20]. Several studies have  
36 demonstrated the high potential of health apps for pain[21–24]. Second, because of the  
37 widespread use of smartphones, they can reach patients with chronic pain at a low  
38 threshold[25]. Despite these positive aspects, there are various barriers to implementing  
39 health apps within clinical practice. It is thus important to identify and overcome these  
40 specific barriers[26].

41  
42  
43  
44  
45 One barrier on the practitioners' side is that they play a gatekeeping role in electronic  
46 treatment forms[27]. Even if physicians consider health apps to be helpful[28], integration  
47 of health apps in their daily work is slow[29]. Although many patients are eager to try  
48 health apps[30] health professionals recommend them seldom[31,32]. One potential reason  
49 is their moderate acceptance of eHealth[33]. There is ample evidence that acceptance is an  
50 important prerequisite to implementing new technologies in practice[34,35]. Across  
51 studies, an important factor influencing acceptance (respective the intention to apply new  
52 technology) is performance expectancy[33,36–39].

To increase acceptance, acceptance-enhancing video interventions have proven to be effective in patients and health practitioners[34,40,41]. However, not all investigations proved able to increase practitioners' acceptance[42,43], suggesting that the educational videos' presentation and content are relevant[34].

Since previous research mainly investigated eHealth in general focusing on internet interventions, little is known about the acceptance of mobile health apps. The main aims of this study was to assess physicians' acceptance of health apps and to increase their acceptance, performance expectancy and credibility thereof via a short video intervention. Our further aim was to identify variables that influence physicians' acceptance of health apps for chronic pain. To the best of our knowledge, this is the first experimental study assessing and modifying physicians' acceptance of health apps in the context of chronic pain.

## **METHODS**

### **Study Design**

The present study is a web-based randomized experimental trial with a parallel-group design. Self-rating questionnaires were used to assess pre- and post-intervention outcomes. The study was preregistered with the Open Science Framework on 12/17/2020 (Trial Registration Number: <https://osf.io/x693r>). All study participants gave their informed consent. The survey was approved by the Ethics Committee of Philipps University of Marburg (reference 2020-72k-2). The survey took an average 14 minutes to complete. Measurements were collected online via the software platform Unipark (Enterprise Feedback Suite survey, version Fall 2020, Questback). Randomization was performed by the software used. All procedures complied with the German Psychological Society's ethical guidelines.

### **Participants**

Data collection was between December 2020 and April 2021. The sample size was determined using an a priori power analysis with G\*Power version 3.1.9.3[44]. We based our calculation on expecting a small effect between groups (expected  $f = .16$ ; power = .8; alpha error probability of .05), resulting in a necessary sample size of 230. Because we assumed a 10% dropout rate, we planned to survey 253 subjects. While 354 people expressed interested to participate, 257 participants completed the questionnaires at post-intervention, yielding a completion rate of 73% (Figure 1). Inclusion criteria were being employed as a physician and sufficient knowledge of the German language. Study participants were collected online through their practices, hospitals, and medical communities. We also investigated a sample of 101 medical students.

1  
2  
3 [Please insert figure 1 about here]  
4  
5

## 6 **Measures**

### 7 **Primary Outcome**

8 Acceptance of the Unified Theory of Acceptance and Use of Technology model  
9 (UTAUT)[35] was our primary outcome. Acceptance according to the UTAUT model is  
10 conceived as the intention to use (new) technologies. The three acceptance items (table 1)  
11 were added together as a cumulative score, giving a range of 3 – 15. To make our data  
12 easier to interpret, we considered values as low (3 – 6), moderate (7 – 11) and high (12 –  
13 15). This classification is similar to other studies[33,34].  
14  
15  
16

### 17 **Secondary Outcomes**

18 Performance expectancy of the UTAUT model was our secondary outcome. It was  
19 surveyed by means of 3 items (Table 1). Performance expectancy is conceptualized as the  
20 expectation that an intervention will be beneficial.  
21  
22

23 An additional secondary outcome was the credibility of health apps, which we assessed via  
24 the credibility/expectancy questionnaire (CEQ)[45]. The credibility scale (e.g., “How  
25 logical does the medical use of health apps for chronic pain seem to you?”), includes 3  
26 items and asks about treatment credibility on a 9-point response scale (ranging from 1 =  
27 not at all useful to 9 = very useful).  
28

29 Primary and secondary outcomes were measured both before and after the intervention.  
30 With our medical student cohort, only the primary and secondary outcomes were assessed.  
31  
32

### 33 **Predictors of acceptance**

34 Predictors of acceptance were examined. For this purpose, we used the baseline variable  
35 of acceptance as dependent variable and multiple predictors as independent variables (see  
36 Statistical Analysis).  
37  
38

39 Socio-demographic variables included age, gender and field of specialization. All of the  
40 following items had to be slightly adapted for the purposes of this study.

41 We assessed the four main constructs of UTAUT model[35]. The UTAUT model is an  
42 established model which states that the four constructs performance expectancy; effort  
43 expectancy; facilitating conditions; and social influence have an effect on the acceptance  
44 and intention to use (new) technologies. The scales consist of statements (table 1) that can  
45 be agreed to using a 5-point response scale (answers ranging from 1 = totally disagree to 5  
46 = totally agree). Higher values indicate a higher level of the construct. Items were adapted  
47 from different studies[40,46,47].  
48

49 From the Attitudes toward Psychological Online Interventions questionnaire (APOI)[48],  
50 we used the scepticism and perception of risks scale, which contains 4 statements (e.g., “It  
51 is difficult for patients to effectively integrate health apps into their daily lives.”) that can  
52 be agreed on a 5-point scale (ranging from 1 = totally agree to 5 = totally disagree). We  
53  
54  
55  
56  
57  
58  
59



excluded 1 item because its content did not fit the survey (“By using a POI [Psychological Online Interventions], I do not receive professional support.”).

Openness (e.g., “I would use new treatments to help my patients.”) and intuitive appeal (e.g., “If you learned about a new health app, how likely would you be to use it if it appealed to you intuitively?”) were assessed with the Evidence-based Practice Attitude Scale-36 (EBPAS)[49]. The EBPAS measures difficulties and supportive factors in implementing evidence-based treatment approaches with sound psychometric scores. Both scales consist of 4 statements or questions that can be agreed to on a 5-point scale (ranging from 0 = not at all to 4 = to a very great extent).

**Table 1** UTAUT Items.

| UTAUT Scale             | Items                                                                                                                                                                                                                                                                     |
|-------------------------|---------------------------------------------------------------------------------------------------------------------------------------------------------------------------------------------------------------------------------------------------------------------------|
| Acceptance              | <ol style="list-style-type: none"> <li>1. I can basically imagine prescribing a health app.</li> <li>2. I would prescribe health apps regularly.</li> <li>3. I would recommend health apps to colleagues.</li> </ol>                                                      |
| Performance Expectancy  | <ol style="list-style-type: none"> <li>1. Using health apps would improve the effectiveness of my work.</li> <li>2. Using health apps would help me in my work and increase my productivity.</li> <li>3. Overall, health apps would help me treat my patients.</li> </ol> |
| Effort Expectancy       | <ol style="list-style-type: none"> <li>1. Using health apps would be easy.</li> <li>2. Using health apps would be easy for me.</li> <li>3. The use of health apps would be clear and understandable to me.</li> </ol>                                                     |
| Social Influence        | <ol style="list-style-type: none"> <li>1. Colleagues would advise me to use health apps.</li> <li>2. My supervisors and/or experienced colleagues would recommend that I use health apps.</li> </ol>                                                                      |
| Facilitating Conditions | <ol style="list-style-type: none"> <li>1. I would get support for technical problems with health apps.</li> <li>2. I have the necessary technical skills to use health apps.</li> </ol>                                                                                   |

*Notes.* Items are adapted from[40,46,47].

### Intervention

The CG watched a video providing general information about chronic pain (e.g., prevalence and costs for the health care system). The EG watched a video that discussed the content of health apps (e.g., how they can be used, and the results of recent studies). Both videos were matched in terms of length and visuals (Figure 2). Skipping the video

1  
2  
3 was not possible due to the survey software. We produced the video with the commercial  
4 software Powtoon (2012–2021 Powtoon Limited). A professional narrator recorded the  
5 audio track. An English translation of the spoken text is in the supplementary material.  
6  
7

8 *[Please insert figure 2 about here]*  
9

## 10 11 **Statistical Analysis**

12 We used the 26th version of IBM SPSS Statistics software for statistical analyses. There  
13 were no missing data due to the software (participants had to answer all questions to get to  
14 the next page). For all analyses, we used a type-1 error level of 5%.

15 Both Mahalanobis distance and Cook's distance were used to detect multivariate  
16 outliers[50]. According to the suggestion of Pituch and Stevens (2016), univariate outliers  
17 were calculated using standardized values[50]. We checked data for plausibility before  
18 exclusion. In addition, we checked subjects' comments at the end of the survey for possible  
19 bias.  
20  
21

22 To detect any differences between baseline values, we conducted a multivariate analysis  
23 of variance (MANOVA) for age; APOI; EBPAS; CEQ; and the UTAUT variables. Gender  
24 differences via Chi square test.  
25  
26

27 The video's influence on our primary and secondary outcomes was assessed via a 2  
28 (condition) x 2 (time) repeated measures analysis of variance (ANOVA). Partial eta  
29 squared was used as the effect size measure, as suggested by Richardson (2011). Effect  
30 sizes were classified according to Richardson[51] based on Cohen[52]. To reduce inflation  
31 of the alpha error, we applied Bonferroni correction to secondary outcomes[53].  
32  
33

34 The variables influencing health apps' acceptance were calculated using linear regression,  
35 in which we added predictor groups blockwise: first, demographic variables (age; gender;  
36 daily smartphone time; professional smartphone use in a working context). The APOI,  
37 EBPAS, and CEQ scales were then added. Last, the four UTAUT predictors were added to  
38 the model. Acceptance from the pre-measurement was the dependent variable[33]. Because  
39 of the large number of predictors and resulting overestimation of  $R^2$ , we referred to an  
40 adjusted  $R^2$  as the outcome[54].  
41  
42  
43

## 44 **Patient and public involvement**

45 No patient involved.  
46  
47

## 48 **RESULTS**

### 49 **Sample Characteristics**

50 After inspecting the data, there was one exclusion because the subject said that he had filled  
51 in the questionnaires arbitrarily. 8 subjects were excluded because they had stated  
52 "psychological psychotherapist" as their specialist direction, which in Germany indicates  
53 that they were not physicians but psychologists. This reduced our sample to 248 (38.71%  
54  
55  
56  
57  
58  
59  
60

female) ( $n_{EG}=124$ ;  $n_{CG}=124$ ). The average age was 49.56 years ( $SD=11.51$ ). There were no baseline differences between conditions. The most common fields of specialization were general practitioners (89); surgeons (39); anesthesiologists (29); neurologists and psychiatrists (23). Acceptance levels at baseline across both conditions were moderate ( $M=9.51$ ,  $SD=3.53$ ) with 21.4% in the low range, 47.1% in the moderate range, and 31.5% in the high range. See table 2 for a complete list of specialty directions, additional demographic variables as well as pre-values of the baseline measures.

**Table 2** Demographic characteristics.

| Variables                             | Experimental Group | Control Group |
|---------------------------------------|--------------------|---------------|
| Age                                   | 49.65 ± 11.57      | 49.47 ± 11.49 |
| Number (% female)                     | 124 (35.50)        | 124 (41.90)   |
| Professional environment (%)          |                    |               |
| Outpatient                            | 89 (71.8)          | 77 (62.1)     |
| Inpatient                             | 30 (24.2)          | 33 (26.6)     |
| Other                                 | 5 (4.0)            | 14 (11.3)     |
| Medical Specialty (%) <sup>a</sup>    |                    |               |
| General medicine                      | 49 (39.5)          | 40 (32.3)     |
| Surgery                               | 17 (13.7)          | 22 (17.7)     |
| Neurology                             | 17 (13.7)          | 6 (4.8)       |
| Anesthesiology                        | 11 (8.9)           | 18 (14.5)     |
| Orthopedics                           | 6 (4.8)            | 8 (6.5)       |
| Pediatrics                            | 5 (4)              | 8 (6.5)       |
| Other                                 | 19 (15.4)          | 22 (17.7)     |
| CEQ                                   |                    |               |
| Credibility                           | 5.28 ± 1.78        | 5.14 ± 1.96   |
| APOI                                  |                    |               |
| Scepticism and Perception<br>of Risks | 2.66 ± 0.74        | 2.68 ± 0.81   |
| EBPAS                                 |                    |               |
| Openness                              | 3.65 ± 0.87        | 3.66 ± 0.93   |
| Intuitive Appeal                      | 3.64 ± 0.88        | 3.57 ± 0.93   |
| UTAUT                                 |                    |               |
| Acceptance                            | 9.73 ± 3.33        | 9.30 ± 3.72   |
| Performance Expectancy                | 8.60 ± 3.00        | 8.30 ± 3.10   |
| Effort Expectancy                     | 11.03 ± 2.47       | 10.73 ± 2.42  |
| Social Influence                      | 5.80 ± 2.10        | 5.40 ± 1.95   |
| Facilitating Conditions               | 7.60 ± 1.71        | 7.48 ± 1.95   |

Notes. Values represent averages ( $\pm$  standard deviation), frequency or percentages; CEQ=credibility/expectancy questionnaire (range: 1-9); APOI=Attitudes toward Psychological Online Interventions questionnaire (range:1-5); EBPAS=Evidence-based Practice Attitude Scale-36 (range: 0-4); UTAUT=Unified Theory of Acceptance and Use of Technology (Acceptance, Performance Expectancy, Effort Expectancy range: 3-15, Social Influence and Facilitating Conditions range 2-10); <sup>a</sup>Only those medical specialties are listed that were represented by more than 5% in one of the two groups.

### Primary Outcome

Our subjects' acceptance was increased by means of the video (significant main effect of time ( $F(1, 246)=15.28, p<.001, \eta^2_p=.06$ )). Further subjects of the EG showed higher increases than those of the CG (significant time x condition interaction ( $F(1, 246)=15.28, p=.01, \eta^2_p=.02$ )). After the intervention, the EG ( $M=10.51, SD=3.28$ ) had higher post-acceptance scores than the CG ( $M=9.48, SD=3.57$ ) ( $t(246)=-2.37, p=.01$ ). Figure 3 shows a comparison between the medical student sample and the physicians.

[please insert figure 3 about here]

### Secondary Outcomes

Performance expectancy could also be increased by the video (main effect of time ( $F(1, 246)=66.85, p<.001, \eta^2_p=.21$ )). Again, the increase was higher in the EG than in the CG (significant time x condition interaction ( $F(1, 246)=6.10, p=.01, \eta^2_p=.02$ )). The EG ( $M=9.94, SD=3.16$ ) had higher post-performance expectancy scores than the CG ( $M=9.02, SD=3.34$ ) ( $t(246)=-2.23, p=.01$ ).

We found the same pattern of results for credibility. It was increased by the video (significant effect of time ( $F(1, 246)=64.47, p<.001, \eta^2_p=.21$ ), with a higher increase in the EG (significant time x condition interaction ( $F(1, 246)=25.61, p<.001, \eta^2_p=.09$ )). Post values of the EG ( $M=6.07, SD=1.87$ ) were higher than those of the CG ( $M=5.31, SD=2.14$ ) ( $t(246)=-2.95, p=.002$ ). Figure 4 shows a comparison between the medical student sample and the physicians in terms of credibility.

[Please insert figure 4 about here]

The medical students' pattern of results was identical to those illustrated above (see supplementary material for a detailed presentation of results and demographic variables). The time x condition interaction effect for acceptance had an effect size of  $\eta^2_p=.13$  (Figure 2); for performance expectancy an effect size of  $\eta^2_p=.09$ ; and for credibility an effect size of  $\eta^2_p=.21$  (Figure 3).

### Predictors of acceptance

1  
2  
3 Linear regression with the predictors from the first block was significant ( $R^2_{adj}=.14$ ,  $F(4,$   
4  $242)=11.01$ ,  $p<.001$ ). Age ( $\beta=-.23$ ,  $p=.001$ ), gender ( $\beta=-.04$ ,  $p=.54$ ), daily smartphone  
5 time ( $\beta=.14$ ,  $p=.05$ ), and smartphone use in a professional context ( $\beta=.20$ ,  $p=.002$ ) were  
6 related to acceptance.  
7

8 The model improved when we added the second block with APOI, EBPAS as well as CEQ  
9 scales ( $R^2_{adj}=.70$ ,  $F(9, 237)=64.14$ ,  $p<.001$ ). Credibility ( $\beta=.51$ ,  $p<.001$ ) was the strongest  
10 predictor followed by skepticism ( $\beta=-.23$ ,  $p<.001$ ) and intuitive appeal ( $\beta=.13$ ,  $p=.01$ ).  
11 None of the predictors from the first block were significant.  
12

13 The model improved marginally after adding the UTAUT variables ( $R^2_{adj}=.73$ ,  $F(13,$   
14  $233)=51.95$ ,  $p<.001$ ). Again, credibility was the best predictor ( $\beta=.34$ ,  $p<.001$ ), followed  
15 by performance expectancy ( $\beta=.30$ ,  $p<.001$ ), skepticism ( $\beta=-.18$ ,  $p<.001$ ) and intuitive  
16 appeal ( $\beta=.11$ ,  $p=.03$ ). None of the other predictors were significant.  
17  
18  
19

## 20 **DISCUSSION**

21 The current study is the first to explicitly investigate physicians' acceptance of health  
22 apps focusing on chronic pain. Our results complement preceding studies by adding the  
23 physicians' perspective within an outpatient setting. The main aims of this study were to  
24 survey physicians' current acceptance of health apps for patients with chronic pain and to  
25 increase their acceptance. In general, physicians' and medical students' acceptance for  
26 health apps was moderate, which indicates a higher openness than previous studies[33].  
27 The experimental intervention successfully increased acceptance, performance  
28 expectancy and credibility of health apps among physicians and medical students. Our  
29 additional study aim was to identify variables that influence acceptance. Credibility and  
30 performance expectancy were the strongest predictors of acceptance, followed by  
31 skepticism and intuitive appeal.  
32  
33  
34  
35  
36

37 We found that our physicians' moderate acceptance of health apps was higher than that  
38 reported in previous studies: A survey conducted between 2015 and 2016 among various  
39 health care professionals observed rather low acceptance rates for electronic health  
40 interventions[33]. According to a recent study, psychotherapists exhibited mixed  
41 acceptance of blended care (a combination of internet and mobile base interventions and  
42 face-to-face therapy)[34]. However, the aforementioned study was conducted several years  
43 ago and perceptions of eHealth may have changed in the meantime. In particular, the  
44 COVID-19 pandemic may have influenced opinions about electronic health  
45 interventions[55]. Also, unlike the studies mentioned above, we specifically asked about  
46 health apps in our survey.  
47  
48  
49  
50

51 Our results indicate that brief educational videos may be an effective acceptance-  
52 facilitating intervention for physicians. Results from acceptance-enhancing interventions  
53 in other studies were inconclusive. Some researchers demonstrated positive effects[34],  
54  
55  
56  
57  
58  
59

1  
2  
3 while others identified no effects[42,43]. Most researchers employed video interventions  
4 to increase acceptance toward eHealth interventions in general (e.g. online interventions)  
5 but not by focusing on apps in particular. Another potential explanation of our positive  
6 findings is the specific focus on chronic pain, as the perceived usefulness of e- and mHealth  
7 interventions could be disorder-specific. In addition to the content, the presentation's  
8 format could also be important, as aesthetics contribute to the credibility of  
9 information[56]. One advantage of the current study is that we applied professional  
10 software to develop an appealing video that might be more convincing.  
11  
12  
13

14  
15 However, the higher effect sizes of the student sample lead us to cautiously conclude that  
16 the intervention may be more effective with students. Young professionals thus appear to  
17 be more receptive to interventions promoting the acceptance of health apps. Since high  
18 acceptance does not automatically lead to action[57], long-term studies examining the  
19 actual use of health apps among (prospective) physicians would be worthwhile.  
20  
21  
22

23 The strong association we detected between performance expectancy and acceptance is in  
24 line with other research findings. Across studies, performance expectancy has consistently  
25 proven to be one of the most important predictors of acceptance of new technologies in the  
26 healthcare sector[33,38]. This strong association between performance expectancy and  
27 acceptance suggests that physicians' acceptance can be increased by highlighting the  
28 benefits of health apps for their patients and themselves. This is also supported by a study  
29 which found that physicians are more likely to use mobile devices with drug reference  
30 software if they believe it will help their patients[58]. In contrast to Hennemann and  
31 colleagues[33], we found no impact of social influence on acceptance, nor did we find any  
32 influence of facilitating conditions as Liu and colleagues did[38]. Note that the subjects in  
33 those two studies were surveyed in inpatient settings. We mainly surveyed physicians in  
34 an outpatient setting. Accordingly, our physicians were probably relying less on their  
35 employer's facilitation because they are often self-employed. The same might apply to  
36 social support: Medical practices employ much less staff than hospitals, a fact that may  
37 have contributed to this construct being less significant in this survey. Additionally, it is  
38 worth mentioning that the two studies above did not specifically survey acceptance towards  
39 health apps and that they were conducted a few years ago. The relevance of certain  
40 constructs like facilitating conditions may have lessened since then.  
41  
42  
43  
44  
45  
46  
47

48 The association we found between credibility and acceptance also concurs with previous  
49 research findings. A study with college students concluded that credibility influences the  
50 perceptions of health apps positively[59]. The credibility of new technologies in the  
51 healthcare field is important[60] as it increases the likelihood that the technology will be  
52 used in the short and long term[61,62]. Accordingly, the low prescription rates (or the  
53 paucity of recommendations) of health apps by physicians could be partly attributable to  
54  
55  
56  
57  
58  
59  
60



1  
2  
3 their lack of credibility. One potential reason for this is the low quality of many health apps  
4 on the market[63]. Important to the credibility of information about new electronic health  
5 measures is the source of the information. Websites controlled by editors are perceived to  
6 be more credible, as is information from independent medical experts[64]. Because the  
7 source of the material appears to be more important than its design[65], independent  
8 research institutes can play an important role in disseminating evidence-based information  
9 about electronic health care interventions. By including highly visible videos on their  
10 websites, they could increase both the acceptance and awareness of health apps. Our results  
11 indicate that such an approach holds particular promise for medical students, highlighting  
12 the call for establishing eHealth curricula in education[60,66].  
13  
14  
15  
16

17  
18 Technological influences will continue to make strong inroads into medicine[67], which  
19 requires that health care professionals are able to adapt new technologies flexibly.  
20 Especially considering the rapid technological progress in this area, the evidence from  
21 earlier studies and from ours provide valuable information about the importance of  
22 communicating with physicians, psychotherapists, and other professional groups in the  
23 health care sector about eHealth in general and health apps in particular. Video  
24 interventions can be an effective and cost-saving means of communicating the potential,  
25 opportunities, and limitations of these new technologies. They reach the target group at a  
26 low threshold, for example, by being included on informational websites, newsletters or at  
27 training courses. This informational material should emphasize both performance  
28 expectancy and the credibility of the intervention being addressed.  
29  
30  
31  
32

### 33 **Limitations**

34  
35 Our study has some limitations. First, there may have been a selection bias due to the data  
36 collection method. Thus, physicians who were already open and interested in mHealth may  
37 have participated, which would restrict the generalizability of our results. Furthermore, our  
38 results relied solely on self-reporting. Most of our items were adaptations of already tested  
39 items or scales on questionnaires. This approach was necessary due to the lack of  
40 appropriate health app-specific questionnaires, but it remains a limitation. Because of the  
41 survey's brevity, we could not collect many other potentially relevant constructs like the  
42 technologization threat[48] or motivation. As acceptance due to self-regulatory deficits[68]  
43 does not guarantee that intention becomes an action in the future[57], longitudinal surveys  
44 to examine whether video interventions increase the actual recommendations or  
45 prescriptions of the respective technologies should be one of the next steps in research.  
46  
47  
48  
49  
50

### 51 **Strengths**

52 To our knowledge, this is the first study that investigated and increased the acceptance by  
53 physicians of health apps for managing chronic pain. This professional group is of  
54 particular interest due to the gatekeeper role they play in the healthcare system.  
55  
56  
57  
58  
59  
60

1  
2  
3 Furthermore, we based the UTAUT questionnaires on predecessor studies, to increase  
4 comparability. In addition, we engaged a strong control group whose intervention was  
5 time-wise, visually, and audibly identical to the intervention video. Despite the brevity of  
6 the survey and our strong control group, we identified a superior effect of the intervention  
7 video. The video intervention was very short and can be integrated at a low-threshold  
8 within different platforms.  
9  
10

## 11 **Conclusion**

12 Our results show that physicians are open to using health apps for chronic pain patients as  
13 they demonstrated moderate to high acceptance rates. Our study also shows that  
14 performance expectancy and credibility had the strongest influence on acceptance. As low-  
15 threshold entities, brief video interventions are useful tools that can strengthen these  
16 constructs and reach a high number of health professionals. They can thus be helpful in  
17 overcoming certain barriers to implementing mobile health interventions in clinical  
18 practice. Future studies should focus on the long-term behavioral effects of such  
19 interventions.  
20  
21  
22  
23  
24  
25

## 26 **Acknowledgements**

27 We would like to thank Nora Jander for her excellent voice-over on the video, and to Benno  
28 Glöckler and Kari Fuhrmann for their support in recruiting the physicians.  
29  
30

## 31 **Disclosure of Interest**

32 None declared.  
33  
34

## 35 **Funding**

36 This research received no specific grant from any funding agency in the public, commercial  
37 or not-for-profit sectors.  
38  
39

## 40 **Author Contributions**

41 HJH, JAG, WR, JR: Conception and design of the study; HJH: data collection, analysis,  
42 and interpretation, manuscript preparation; JAG, WR, JR: supervision, manuscript editing  
43 and reviewing; JR: project administration. All authors approved the final manuscript.  
44  
45  
46

## 47 **Data sharing statement**

48 Data can be shared upon reasonable request. A request can be made to the corresponding  
49 author.  
50  
51

## 52 **Legends of the figures**

53 **Figure 1** Flowchart.  
54  
55  
56  
57  
58  
59  
60



**Figure 2** Screenshots of the video interventions. Left: Experimental video; Right: Control video.

**Figure 3** Level of acceptance. Left: Physicians; Right: Medical students; EG=Experimental Group; CG=Control Group; pre=Measurement before the video; post=Measurement after the video; Error bars indicate standard errors; \*  $p < .05$ ; \*\*  $p < .005$ .

**Figure 4** Level of credibility. Left: Physicians; Right: Medical students; EG=Experimental Group; CG=Control Group; pre=Measurement before the video; post=Measurement after the video; Error bars indicate standard errors; \*\*  $p < .001$ .

## References

1. Vos T, Allen C, Arora M, *et al.* Global, regional, and national incidence, prevalence, and years lived with disability for 310 diseases and injuries, 1990–2015: a systematic analysis for the Global Burden of Disease Study 2015. *Lancet* 2016;388:1545–602. [https://doi.org/10.1016/S0140-6736\(16\)31678-6](https://doi.org/10.1016/S0140-6736(16)31678-6).
2. Graham JE, Streitel KL. Sleep quality and acute pain severity among young adults with and without chronic pain: the role of biobehavioral factors. *J Behav Med* 2010;33:335–45. <https://doi.org/10.1007/s10865-010-9263-y>.
3. Ratcliffe GE, Enns MW, Belik S-L, *et al.* Chronic Pain Conditions and Suicidal Ideation and Suicide Attempts: An Epidemiologic Perspective. *Clin J Pain* 2008;24:204–10. <https://doi.org/10.1097/AJP.0b013e31815ca2a3>.
4. Ryan S, Hill J, Thwaites C, *et al.* Assessing the effect of fibromyalgia on patients' sexual activity. *Nurs Stand* 2008;23:35–41. <https://doi.org/10.7748/ns2008.09.23.2.35.c6669>.
5. Veehof MM, Trompetter HR, Bohlmeijer ET, *et al.* Acceptance- and mindfulness-based interventions for the treatment of chronic pain: a meta-analytic review. *Cogn Behav Ther* 2016;45:5–31. <https://doi.org/10.1080/16506073.2015.1098724>.
6. Glombiewski JA, Holzappel S, Riecke J, *et al.* Exposure and CBT for chronic back pain: An RCT on differential efficacy and optimal length of treatment. *J Consult Clin Psychol* 2018;86:533–45. <https://doi.org/10.1037/ccp0000298>.
7. Williams AC de C, Fisher E, Hearn L, *et al.* Psychological therapies for the management of chronic pain (excluding headache) in adults. *Cochrane Database Syst Rev* 2020;2021. <https://doi.org/10.1002/14651858.CD007407.pub4>.
8. Morley S. Relapse prevention: Still neglected after all these years. *Pain* 2008;134:239–40. <https://doi.org/10.1016/j.pain.2007.12.004>.
9. Gaskin DJ, Richard P. The Economic Costs of Pain in the United States. *J Pain* 2012;13:715–24. <https://doi.org/10.1016/j.jpain.2012.03.009>.
10. Leadley RM, Armstrong N, Lee YC, *et al.* Chronic Diseases in the European Union: The Prevalence and Health Cost Implications of Chronic Pain. *J Pain Palliat Care Pharmacother* 2012;26:310–25. <https://doi.org/10.3109/15360288.2012.736933>.

11. Landmark T, Romundstad P, Dale O, *et al.* Chronic pain: One year prevalence and associated characteristics (the HUNT pain study). *Scand J Pain* 2013;4:182–7. <https://doi.org/10.1016/j.sjpain.2013.07.022>.
12. Patel S, Greasley K, Watson PJ. Barriers to rehabilitation and return to work for unemployed chronic pain patients: A qualitative study. *Eur J Pain* 2007;11:831–40. <https://doi.org/10.1016/j.ejpain.2006.12.011>.
13. Turner JA. Pain and disability. Clinical, behavioral, and public policy perspectives (Institute of Medicine Committee on pain, disability, and chronic illness behavior). *Pain* 1988;32:385–6. [https://doi.org/10.1016/0304-3959\(88\)90054-1](https://doi.org/10.1016/0304-3959(88)90054-1).
14. Austrian JS, Kerns RD, Carrington Reid M. Perceived Barriers to Trying Self-Management Approaches for Chronic Pain in Older Persons. *J Am Geriatr Soc* 2005;53:856–61. <https://doi.org/10.1111/j.1532-5415.2005.53268.x>.
15. Becker WC, Dorflinger L, Edmond SN, *et al.* Barriers and facilitators to use of non-pharmacological treatments in chronic pain. *BMC Fam Pract* 2017;18:41. <https://doi.org/10.1186/s12875-017-0608-2>.
16. International Pain Summit of the In. Declaration of Montréal: Declaration That Access to Pain Management Is a Fundamental Human Right. *J Pain Palliat Care Pharmacother* 2011;25:29–31. <https://doi.org/10.3109/15360288.2010.547560>.
17. Holmes EA, Ghaderi A, Harmer CJ, *et al.* The Lancet Psychiatry Commission on psychological treatments research in tomorrow's science. *The Lancet Psychiatry* 2018;5:237–86. [https://doi.org/10.1016/S2215-0366\(17\)30513-8](https://doi.org/10.1016/S2215-0366(17)30513-8).
18. Luxton DD, McCann RA, Bush NE, *et al.* mHealth for mental health: Integrating smartphone technology in behavioral healthcare. *Prof Psychol Res Pract* 2011;42:505–12. <https://doi.org/10.1037/a0024485>.
19. Alexander J, Joshi G. Smartphone applications for chronic pain management: a critical appraisal. *J Pain Res* 2016;Volume 9:731–4. <https://doi.org/10.2147/JPR.S119966>.
20. Chhabra HS, Sharma S, Verma S. Smartphone app in self-management of chronic low back pain: a randomized controlled trial. *Eur Spine J* 2018;27:2862–74. <https://doi.org/10.1007/s00586-018-5788-5>.
21. Johnson SS, Levesque DA, Broderick LE, *et al.* Pain Self-Management for Veterans: Development and Pilot Test of a Stage-Based Mobile-Optimized Intervention. *JMIR Med Informatics* 2017;5:e40. <https://doi.org/10.2196/medinform.7117>.
22. Moman RN, Dvorkin J, Pollard EM, *et al.* A Systematic Review and Meta-analysis of Unguided Electronic and Mobile Health Technologies for Chronic Pain—Is It Time to Start Prescribing Electronic Health Applications? *Pain Med* 2019;20:2238–55. <https://doi.org/10.1093/pm/pnz164>.
23. Silva EH, Lawler S, Langbecker D. The effectiveness of mHealth for self-management in improving pain, psychological distress, fatigue, and sleep in cancer survivors: a systematic review. *J Cancer Surviv* 2019;13:97–107. <https://doi.org/10.1007/s11764-018-0730-8>.
24. Toelle TR, Utpadel-Fischler DA, Haas K-K, Priebe JA. App-based multidisciplinary back pain treatment versus combined physiotherapy plus online education: a randomized controlled trial. *Npj Digit Med* 2019;2:34. <https://doi.org/10.1038/s41746-019-0109-x>.

- 1
  - 2
  - 3
  - 4
  - 5
  - 6
  - 7
  - 8
  - 9
  - 10
  - 11
  - 12
  - 13
  - 14
  - 15
  - 16
  - 17
  - 18
  - 19
  - 20
  - 21
  - 22
  - 23
  - 24
  - 25
  - 26
  - 27
  - 28
  - 29
  - 30
  - 31
  - 32
  - 33
  - 34
  - 35
  - 36
  - 37
  - 38
  - 39
  - 40
  - 41
  - 42
  - 43
  - 44
  - 45
  - 46
  - 47
  - 48
  - 49
  - 50
  - 51
  - 52
  - 53
  - 54
  - 55
  - 56
  - 57
  - 58
  - 59
  - 60
25. Demiris G, Afrin LB, Speedie S, *et al.* Patient-centered Applications: Use of Information Technology to Promote Disease Management and Wellness. A White Paper by the AMIA Knowledge in Motion Working Group. *J Am Med Informatics Assoc* 2008;15:8–13. <https://doi.org/10.1197/jamia.M2492>.
26. Kao C-K, Liebovitz DM. Consumer Mobile Health Apps: Current State, Barriers, and Future Directions. *PM&R* 2017;9:S106–15. <https://doi.org/10.1016/j.pmrj.2017.02.018>.
27. Cowan KE, McKean AJ, Gentry MT, *et al.* Barriers to Use of Telepsychiatry: Clinicians as Gatekeepers. *Mayo Clin Proc* 2019;94:2510–23. <https://doi.org/10.1016/j.mayocp.2019.04.018>.
28. Kayyali R, Peletidi A, Ismail M, *et al.* Awareness and Use of mHealth Apps: A Study from England. *Pharmacy* 2017;5:33. <https://doi.org/10.3390/pharmacy5020033>.
29. Anastasiadou D, Folkvord F, Serrano-Troncoso E, *et al.* Mobile Health Adoption in Mental Health: User Experience of a Mobile Health App for Patients With an Eating Disorder. *JMIR MHealth UHealth* 2019;7:e12920. <https://doi.org/10.2196/12920>.
30. Parker SJ, Jessel S, Richardson JE, *et al.* Older adults are mobile too! Identifying the barriers and facilitators to older adults' use of mHealth for pain management. *BMC Geriatr* 2013;13:43. <https://doi.org/10.1186/1471-2318-13-43>.
31. Byambasuren O, Beller E, Glasziou P. Current Knowledge and Adoption of Mobile Health Apps Among Australian General Practitioners: Survey Study. *JMIR MHealth UHealth* 2019;7:e13199. <https://doi.org/10.2196/13199>.
32. Ross EL, Jamison RN, Nicholls L, *et al.* Clinical Integration of a Smartphone App for Patients With Chronic Pain: Retrospective Analysis of Predictors of Benefits and Patient Engagement Between Clinic Visits. *J Med Internet Res* 2020;22:e16939. <https://doi.org/10.2196/16939>.
33. Hennemann S, Beutel ME, Zwerenz R. Ready for eHealth? Health Professionals' Acceptance and Adoption of eHealth Interventions in Inpatient Routine Care. *J Health Commun* 2017;22:274–84. <https://doi.org/10.1080/10810730.2017.1284286>.
34. Baumeister H, Terhorst Y, Grässle C, *et al.* Impact of an acceptance facilitating intervention on psychotherapists' acceptance of blended therapy. *PLoS One* 2020;15:e0236995. <https://doi.org/10.1371/journal.pone.0236995>.
35. Venkatesh V, Morris MG, Davis GB *et al.* User Acceptance of Information Technology: Toward a Unified View. *MIS Q* 2003;27:425. <https://doi.org/10.2307/30036540>.
36. Gagnon M-P, Ngangue P, Payne-Gagnon J, *et al.* m-Health adoption by healthcare professionals: a systematic review. *J Am Med Informatics Assoc* 2016;23:212–20. <https://doi.org/10.1093/jamia/ocv052>.
37. Lazuras L, Dokou A. Mental health professionals' acceptance of online counseling. *Technol Soc* 2016;44:10–4. <https://doi.org/10.1016/j.techsoc.2015.11.002>.
38. Liu L, Miguel Cruz A, Rios Rincon A, *et al.* What factors determine therapists' acceptance of new technologies for rehabilitation – a study using the Unified Theory of Acceptance and Use of Technology (UTAUT). *Disabil Rehabil*

- 2015;37:447–55. <https://doi.org/10.3109/09638288.2014.923529>.
39. Sezgin E, Özkan-Yildirim S, Yildirim S. Investigation of physicians' awareness and use of mHealth apps: A mixed method study. *Heal Policy Technol* 2017;6:251–67. <https://doi.org/10.1016/j.hlpt.2017.07.007>.
40. Baumeister H, Seiffarth H, Lin J, *et al*. Impact of an Acceptance Facilitating Intervention on Patients' Acceptance of Internet-based Pain Interventions. *Clin J Pain* 2015;31:528–35. <https://doi.org/10.1097/AJP.000000000000118>.
41. Lin J, Faust B, Ebert DD, *et al*. A Web-Based Acceptance-Facilitating Intervention for Identifying Patients' Acceptance, Uptake, and Adherence of Internet- and Mobile-Based Pain Interventions: Randomized Controlled Trial. *J Med Internet Res* 2018;20:e244. <https://doi.org/10.2196/jmir.9925>.
42. Donovan CL, Poole C, Boyes N, *et al*. Australian mental health worker attitudes towards cCBT: What is the role of knowledge? Are there differences? Can we change them? *Internet Interv* 2015;2:372–81. <https://doi.org/10.1016/j.invent.2015.09.001>.
43. Schuster R, Pokorny R, Berger T, *et al*. The Advantages and Disadvantages of Online and Blended Therapy: Survey Study Amongst Licensed Psychotherapists in Austria. *J Med Internet Res* 2018;20:e11007. <https://doi.org/10.2196/11007>.
44. Faul F, Erdfelder E, Lang A-G, *et al*. G\*Power 3: A flexible statistical power analysis program for the social, behavioral, and biomedical sciences. *Behav Res Methods* 2007;39:175–91. <https://doi.org/10.3758/BF03193146>.
45. Devilly GJ, Borkovec TD. Psychometric properties of the credibility/expectancy questionnaire. *J Behav Ther Exp Psychiatry* 2000;31:73–86. [https://doi.org/10.1016/S0005-7916\(00\)00012-4](https://doi.org/10.1016/S0005-7916(00)00012-4).
46. Baumeister H, Nowoczin L, Lin J, *et al*. Impact of an acceptance facilitating intervention on diabetes patients' acceptance of Internet-based interventions for depression: A randomized controlled trial. *Diabetes Res Clin Pract* 2014;105:30–9. <https://doi.org/10.1016/j.diabres.2014.04.031>.
47. Ebert DD, Berking M, Cuijpers P, *et al*. Increasing the acceptance of internet-based mental health interventions in primary care patients with depressive symptoms. A randomized controlled trial. *J Affect Disord* 2015;176:9–17. <https://doi.org/10.1016/j.jad.2015.01.056>.
48. Schröder J, Sautier L, Kriston L, *et al*. Development of a questionnaire measuring Attitudes towards Psychological Online Interventions-the APOI. *J Affect Disord* 2015;187:136–41. <https://doi.org/10.1016/j.jad.2015.08.044>.
49. Rye M, Torres EM, Friborg O, *et al*. The Evidence-based Practice Attitude Scale-36 (EBPAS-36): A brief and pragmatic measure of attitudes to evidence-based practice validated in US and Norwegian samples. *Implement Sci* 2017;12:1–11. <https://doi.org/10.1186/s13012-017-0573-0>.
50. Pituch KA, Stevens JP. Applied multivariate statistics for the social sciences: Analyses with SAS and IBM's SPSS. 2016.
51. Richardson JTE. Eta squared and partial eta squared as measures of effect size in educational research. *Educ Res Rev* 2011;6:135–47. <https://doi.org/10.1016/j.edurev.2010.12.001>.
52. Cohen J. Statistical power analysis for the behavioural sciences. New York: Academic Press; 1969.

- 1
  - 2
  - 3
  - 4
  - 5
  - 6
  - 7
  - 8
  - 9
  - 10
  - 11
  - 12
  - 13
  - 14
  - 15
  - 16
  - 17
  - 18
  - 19
  - 20
  - 21
  - 22
  - 23
  - 24
  - 25
  - 26
  - 27
  - 28
  - 29
  - 30
  - 31
  - 32
  - 33
  - 34
  - 35
  - 36
  - 37
  - 38
  - 39
  - 40
  - 41
  - 42
  - 43
  - 44
  - 45
  - 46
  - 47
  - 48
  - 49
  - 50
  - 51
  - 52
  - 53
  - 54
  - 55
  - 56
  - 57
  - 58
  - 59
  - 60
53. Armstrong RA. When to use the Bonferroni correction. *Ophthalmic Physiol Opt* 2014;34:502–8. <https://doi.org/10.1111/opo.12131>.
54. Miles J. R -Squared, Adjusted R -Squared. *Encycl. Stat. Behav. Sci.*, vol. 4, Chichester, UK: John Wiley & Sons, Ltd; 2005, p. 1655–7. <https://doi.org/10.1002/0470013192.bsa526>.
55. Wind TR, Rijkeboer M, Andersson G, *et al*. The COVID-19 pandemic: The ‘black swan’ for mental health care and a turning point for e-health. *Internet Interv* 2020;20:100317. <https://doi.org/10.1016/j.invent.2020.100317>.
56. Oyibo K, Vassileva J. What Drives Perceived Usability in Mobile Web Design: Classical or Expressive Aesthetics? *Lect. Notes Comput. Sci. (including Subser. Lect. Notes Artif. Intell. Lect. Notes Bioinformatics)*, vol. 10288 LNCS, 2017, p. 445–62. [https://doi.org/10.1007/978-3-319-58634-2\\_33](https://doi.org/10.1007/978-3-319-58634-2_33).
57. Sheeran P, Webb TL. The Intention-Behavior Gap. *Soc Personal Psychol Compass* 2016;10:503–18. <https://doi.org/10.1111/spc3.12265>.
58. Handler SM, Boyce RD, Ligons FM, *et al*. Use and Perceived Benefits of Mobile Devices by Physicians in Preventing Adverse Drug Events in the Nursing Home. *J Am Med Dir Assoc* 2013;14:906–10. <https://doi.org/10.1016/j.jamda.2013.08.014>.
59. Cho J, Lee HE, Quinlan M. Complementary Relationships Between Traditional Media and Health Apps Among American College Students. *J Am Coll Heal* 2015;63:248–57. <https://doi.org/10.1080/07448481.2015.1015025>.
60. van Gemert-Pinjen J, Wynchank S, Covvey H, *et al*. Improving the credibility of electronic health technologies. *Bull World Health Organ* 2012;90:323–323. <https://doi.org/10.2471/BLT.11.099804>.
61. Shin D-H, Lee S, Hwang Y. How do credibility and utility play in the user experience of health informatics services? *Comput Human Behav* 2017;67:292–302. <https://doi.org/10.1016/j.chb.2016.11.007>.
62. Lin J, Wang B, Wang N, *et al*. Understanding the evolution of consumer trust in mobile commerce: a longitudinal study. *Inf Technol Manag* 2014;15:37–49. <https://doi.org/10.1007/s10799-013-0172-y>.
63. Reynoldson C, Stones C, Allsop M, *et al*. Assessing the Quality and Usability of Smartphone Apps for Pain Self-Management. *Pain Med* 2014;15:898–909. <https://doi.org/10.1111/pme.12327>.
64. Hu Y, Shyam Sundar S. Effects of Online Health Sources on Credibility and Behavioral Intentions. *Communic Res* 2010;37:105–32. <https://doi.org/10.1177/0093650209351512>.
65. Chang Y-S, Zhang Y, Gwizdka J. The effects of information source and eHealth literacy on consumer health information credibility evaluation behavior. *Comput Human Behav* 2021;115:106629. <https://doi.org/10.1016/j.chb.2020.106629>.
66. Gordon WJ, Landman A, Zhang H, *et al*. Beyond validation: getting health apps into clinical practice. *Npj Digit Med* 2020;3:14. <https://doi.org/10.1038/s41746-019-0212-z>.
67. Seyhan AA, Carini C. Are innovation and new technologies in precision medicine paving a new era in patients centric care? *J Transl Med* 2019;17:114. <https://doi.org/10.1186/s12967-019-1864-9>.
68. Gollwitzer PM, Sheeran P. Implementation Intentions and Goal Achievement: A Meta-analysis of Effects and Processes. *Adv. Exp. Soc. Psychol.*, vol. 38, 2006, p.

1  
2  
3 69–119. [https://doi.org/10.1016/S0065-2601\(06\)38002-1](https://doi.org/10.1016/S0065-2601(06)38002-1).  
4  
5  
6  
7  
8  
9  
10  
11  
12  
13  
14  
15  
16  
17  
18  
19  
20  
21  
22  
23  
24  
25  
26  
27  
28  
29  
30  
31  
32  
33  
34  
35  
36  
37  
38  
39  
40  
41  
42  
43  
44  
45  
46  
47  
48  
49  
50  
51  
52  
53  
54  
55  
56  
57  
58  
59  
60



1  
2  
3  
4  
5  
6  
7  
8  
9  
10  
11  
12  
13  
14  
15  
16  
17  
18  
19  
20  
21  
22  
23  
24  
25  
26  
27  
28  
29  
30  
31

Participants (354)

Exclusion (Survey not completed) (97)

Randomization (257)

Experimental Group (127)

Control Group (130)

Analysis with post data (124)  
- Exclusion due to the profession specified (3)

Analysis with post data (124)  
- Exclusion due to the profession specified (5)  
Other exclusion (1)

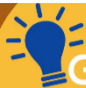

# Gesundheits-Apps?!

1  
2  
3  
4  
5  
6  
7  
8

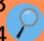

Was sind Gesundheit-Apps?

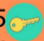

Nutzen von Gesundheits-Apps?

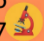

Wissenschaftsstand zu ihnen?

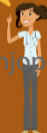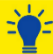

# Chronische Schmerzen?

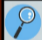

Was sind chronische Schmerzen?

- Ursachen?
- Verbreitung?
- Behandlungsmöglichkeiten?

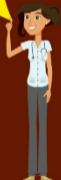

For peer review only - <http://bmjopen.bmj.com/site/about/guidelines.xhtml>



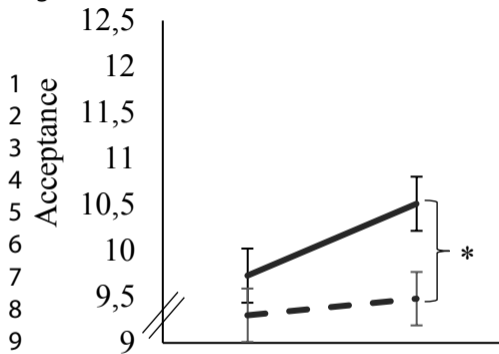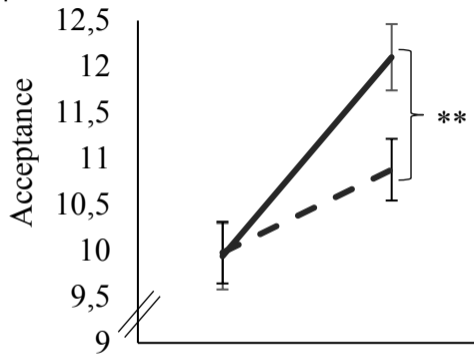

For peer review only - <http://bmjopen.bmj.com/site/about/guidelines.xhtml>

— EG - - CG

— EG - - CG

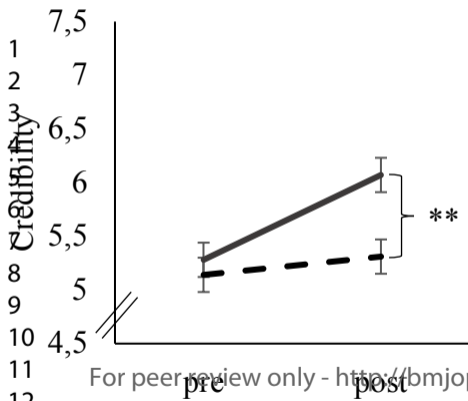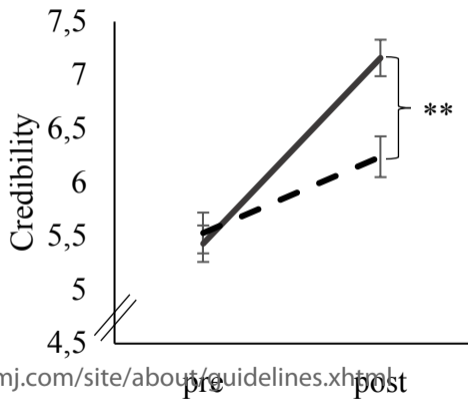

For peer review only - <http://bmjopen.bmj.com/site/about/guidelines.xhtml>

— EG - - CG

— EG - - CG

## SUPPLEMENTARY MATERIAL

### Transcripts and English translations of the video interventions

German transcript of the health app-video

#### Seite 0

Gesundheits-Apps für chronische Schmerzpatient\*innen

#### Seite 1

In diesem Video geht es um Gesundheits-Apps für chronische Schmerzpatient\*innen. Darum, was sie sind, welchen Nutzen Patient\*innen aus ihnen ziehen können und wie der aktuelle Wissenschaftsstand zu ihrer Wirksamkeit aussieht.

#### Seite 2

Ende des Jahres 2019 trat das „Digitale Versorgungs-Gesetz“ in Kraft. Es ermöglicht Ärztinnen und Ärzten ihren Patient\*innen zertifizierte Gesundheits-Apps auf Rezept zu verschreiben.

#### Seite 3

Das Einsatzgebiet von Gesundheits-Apps ist vielfältig.

Sie können etwa nach einem klinischen Aufenthalt zur Nachsorge oder in der ambulanten Versorgung als Therapiebegleitung eingesetzt werden.

Gerade bei chronischen Schmerzen erscheinen Gesundheits-Apps sinnvoll. Sie stehen Patient\*innen jederzeit bei der Bewältigung ihrer Beschwerden zur Verfügung und können beispielsweise bei einem Schmerzschub direkt zur Hand genommen werden.

#### Seite 4

Ziele solcher Apps sind vor allem der Aufbau und die Aufrechterhaltung von Bewältigungsstrategien für den Umgang mit Schmerzen.

Sie können Patient\*innen dabei unterstützen, hinsichtlich ihrer Gesundheitsziele am Ball zu bleiben und ihre mit ihrer Ärztin oder ihrem Arzt vereinbarten Vorsätze zu erreichen. Das kann mittels einer Erinnerungsfunktion, aufgestellten Bewegungsplänen oder ähnlichen geschehen.

Weiterhin können Schmerztagebücher geführt werden, die Patient\*in und Behandler\*in einen visuellen Überblick über den Schmerzverlauf geben.

Darüber hinaus helfen Gesundheits-Apps Patient\*innen dabei, körperliche Übungen durchzuführen – beispielsweise mit unterstützenden Videos.

Sie können auch einen Überblick über die aktuelle Medikation geben. Ebenfalls hilfreich sind vertiefende Hintergrundinformationen, geleitete Entspannungsverfahren oder eine Schritt für Schritt durchgeführte gedankliche Neubewertung der Schmerzsymptome.

#### Seite 5

Mittlerweile gibt es eine ganze Reihe von Studien, die sich mit der Wirksamkeit von Gesundheits-Apps befassen haben.

**Seite 6**

Bereits 2013 zeigten Parker und Kollegen, dass auch ältere, technisch weniger versierte, Patient\*innen an der Nutzung von Gesundheits-Apps zur Unterstützung ihrer Krankheitsbewältigung interessiert sind.

**Seite 7**

Eine Studie aus Norwegen zeigt, dass Patient\*innen, die zusätzlich zur ärztlichen Behandlung eine Smartphone-Intervention nutzten, ihre chronischen Schmerzen eher akzeptieren können und weniger negative Gedanken ihnen gegenüber haben.

**Seite 8**

Toelle und Kollegen zeigten 2019, dass die Behandlung mit einer Gesundheits-App zu einer geringeren Schmerzintensität führt.

**Seite 9**

Weitere Studien zeigen, dass Patient\*innen, die zusätzlich zu ihrer Behandlung Gesundheits-Apps nutzen, zufriedener mit ihrer Behandlung sind... ihren Alltag aktiver gestalten... und ein effektiveres Selbstmanagement haben.

**Seite 10**

Neben diesen Ergebnissen gibt es viele weitere Studien, die sich mit Gesundheits-Apps auseinandersetzen und unser Wissen zu diesem Thema erweitern.

**Seite 11**

Auch wenn es weiterer Forschung bedarf, um das Wirksamkeitspotential von Gesundheits-Apps abschließend einschätzen zu können, sind die bisherigen Studienergebnisse sehr vielversprechend.

Wichtig dabei ist, dass Apps in eine Behandlung eingebunden werden und diese nicht ersetzen sollen.

Ist das gegeben können Apps eine wertvolle Therapiebereicherung sein.

English translation

**Page 0**

Health apps for chronic pain patients

**Page 1**

This video is about health apps for chronic pain patients: what they are, how patients can benefit from them, and what the current state of science is regarding their effectiveness.

**Page 2**

At the end of 2019, the "Digital Care Act" came into force. It enables doctors to prescribe certified health apps to their patients.

**Page 3**

Health apps can be used in a variety of ways.

1  
2  
3 For example, they can be used after a clinical stay for follow-up care or in outpatient care as  
4 therapy support.  
5

6 In the case of chronic pain in particular, health apps seem to be useful. They are available to  
7 patients at any time to help them cope with their symptoms and can, for example, help  
8 immediately in the event of a pain attack.  
9

#### 10 **Page 4**

11 The main aim of such apps is to establish and maintain coping strategies for dealing with pain.  
12

13 They can help patients stay on track with their health goals and achieve the resolutions they  
14 have agreed on with their doctor. This can be done via a reminder function, established  
15 exercise plans, or similar.  
16

17 Furthermore, pain diaries can be used to give patients and doctors a visual overview of their  
18 patient's pain course.  
19

20 In addition, health apps help patients do physical exercises - for example, through supporting  
21 videos.  
22

23 They can also provide an overview of current medication. Other helpful features include in-  
24 depth background information, guided relaxation procedures, or a step-by-step mental re-  
25 evaluation of pain symptoms.  
26

#### 27 **Page 5**

28 Quite a few studies have investigated the effectiveness of health apps.  
29

#### 30 **Page 6**

31 As early as 2013, Parker and colleagues showed that older, less tech-savvy patients are  
32 interested in using health apps to assist with their disease management.  
33

#### 34 **Page 7**

35 A study from Norway showed that patients who used a smartphone intervention in addition to  
36 medical treatment were more likely to accept their chronic pain and have fewer negative  
37 thoughts about it.  
38

#### 39 **Page 8**

40 Toelle and colleagues showed in 2019 that treatment with a health app led to lower pain  
41 intensity.  
42

#### 43 **Page 9**

44 Other studies show that patients who use health apps in addition to their treatment are more  
45 satisfied with their treatment... are more active in their daily lives... and have more effective  
46 self-management.  
47

#### 48 **Page 10**

49 In addition to these findings, many other studies have addressed health apps and deepened our  
50 knowledge on this topic.  
51

#### 52 **Page 11**

1  
2  
3 Although more research is needed to conclusively assess the potential effectiveness of health  
4 apps, the study results to date are very promising.

5  
6 It is important to note that apps should be integrated within treatment and not replace it.

7  
8 If that is the case, apps can be a valuable supplement to therapy.  
9

10  
11  
12  
13  
14 German transcript of the control-video

## 15 **Seite 0**

16 Chronische Schmerzen

## 17 **Seite 1**

18  
19 In diesem Video geht es um chronische Schmerzen: Was sie sind und welche Ursachen sie  
20 haben; wie stark ihre Verbreitung in der Bevölkerung ist und welche  
21 Behandlungsmöglichkeiten es gibt.  
22

## 23 **Seite 2**

24  
25 Von chronischen Schmerzen wird gesprochen, sobald man länger als 6 Monate anhaltende  
26 Schmerzen hat.  
27

28  
29 Chronische Schmerzen können in allen Körperregionen entstehen. Mit Abstand am häufigsten  
30 treten sie jedoch im Rücken auf. Aber auch chronische Kopf- oder Gelenkschmerzen sind keine  
31 Seltenheit.  
32

## 33 **Seite 3**

34  
35 In der Bevölkerung sind chronische Schmerzen weit verbreitet:

36  
37 Von 900 Patient\*innen in ambulanten Arztpraxen haben 327 chronische Schmerzen – das  
38 entspricht über 36% der Patient\*innen. Insgesamt leiden 12 bis 15 Millionen Menschen in  
39 Deutschland an anhaltenden oder wiederkehrenden Schmerzen. Häufig führen Schmerzen zu  
40 anhaltenden Einschränkungen ihres Arbeits- oder Privatlebens.  
41

42  
43 Gerade Rückenschmerzen stellen ein zentrales Problem dar.  
44

## 45 **Seite 4**

46  
47 Rückenschmerzen im Allgemeinen und chronische Rückenschmerzen im Speziellen sind der  
48 häufigste Grund für Arbeitsausfälle. Über 12% der deutschen Bevölkerung sieht sich  
49 aufgrund ihrer Rückenschmerzen in ihrer Lebensführung eingeschränkt.  
50

51  
52 Diese Zahlen machen chronische Rückenschmerzen zur teuersten Krankheit der westlichen  
53 Industrieländer.  
54

55  
56 Rückenschmerzen sind also im wortwörtlichen Sinne das Volksleiden Nummer 1 – und das  
57 obwohl die körperliche Belastung der Arbeitnehmer\*innen immer geringer wird.  
58

## 59 **Seite 5**

1  
2  
3 Zur Diagnostik chronischer Schmerzen verwendet man unter anderem spezifische  
4 Schmerzfragebögen, die die Schmerzintensität, -qualität und -lokalisierung erfassen. Weiterhin  
5 wird erhoben, wie stark die Beeinträchtigung in der alltäglichen Lebensführung durch die  
6 Schmerzen ist.  
7

8 Eine gute Diagnostik ist wichtig, da chronische Schmerzen viele Ursachen haben können, wie  
9 zum Beispiel:

10 Nervenschädigungen; Veränderungen in der knöchernen Struktur; psychische Belastungen;  
11 Entzündungen; muskuläre Prozesse und weitere.  
12  
13  
14

### 15 Seite 6

16 Abgesehen davon, dass chronische Schmerzen ein hohes Maß an körperlichen Unbehagen  
17 verursachen, können sie entsprechend ihrer vielseitigen Ursachen, sehr unterschiedliche  
18 psycho-soziale Folgen haben.  
19

20 Diese reichen von einem andauernden Gefühl der körperlichen Unsicherheit;  
21 Einschränkungen der Bewegungsfreiheit und des Autonomiegefühls bis hin zu einem  
22 verringerten Selbstwert- oder Kontrollgefühl. Auch Schlafstörungen sind eine häufige Folge  
23 chronischer Schmerzen.  
24  
25

26 Aufgrund des hohen Leidensdruck betroffener Patient\*innen, ist eine gut eingebundene  
27 Behandlung der Schmerzen von hoher Wichtigkeit.  
28  
29

### 30 Seite 7

31 Ganz allgemein wird eine multimodale Behandlung empfohlen, also eine Behandlung die von  
32 verschiedenen Gruppen von Behandler\*innen durchgeführt wird.  
33  
34

35 Ärzt\*innen untersuchen dabei, welche körperlichen Ursachen die Schmerzen erklären können  
36 und stehen Patient\*innen für die medizinische Behandlung zur Seite.  
37

38 Physiotherapeut\*innen können Bewegungsübungen mit den Patient\*innen einüben, die sie im  
39 Alltag z. B. mobiler machen können.  
40

41 Und Psychotherapeut\*innen erarbeiten Möglichkeiten, die Lebensqualität der Schmerz-  
42 Patient\*innen zu verbessern.  
43

44 Die Therapiekonzepte für die Behandlung chronischer Schmerzen haben sich in den letzten  
45 Jahren stetig weiterentwickelt. Die multimodale Einbindung der Patient\*innen in die  
46 unterschiedlichen Behandlungsgruppen bleibt aber ein zentrales Konzept.  
47  
48  
49  
50

51 English translation

### 52 Page 0

53 Chronic pain

### 54 Page 1

55 This video is about chronic pain: what it is and what causes it; how prevalent it is in the  
56 population; and what treatment options are available.  
57  
58  
59  
60

**Page 2**

Chronic pain is defined as pain that lasts longer than 6 months.

Chronic pain can occur in all regions of the body. However, it occurs by far most frequently in the back. But chronic headaches and joint pain are not uncommon either.

**Page 3**

Chronic pain is widespread in the population:

Out of 900 patients\* in outpatient medical practices, 327 have chronic pain - this corresponds to over 36% of patients. In total, 12 to 15 million people in Germany suffer from persistent or recurring pain. Pain often leads to persistent restrictions in their work or private life.

Back pain in particular is a major problem.

**Page 4**

Back pain in general and chronic back pain in particular are the most common reason for lost work days. More than 12% of the German population feels that their lifestyle is restricted because of their back pain.

These figures make chronic back pain the most expensive disease in Western industrialized countries.

Back pain is therefore literally the number one health problem among the population - despite the fact that the amount of physical strain on employees keeps dropping.

**Page 5**

To diagnose chronic pain, specific pain questionnaires are used that record pain intensity, quality and location. The extent to which the pain interferes with everyday life is also assessed.

A good diagnosis is important, because chronic pain can have many causes, such as: nerve damage, anomalies in the bony structure, psychological stress, inflammation, muscular processes, etc.

**Page 6**

Apart from the fact that chronic pain causes such physical discomfort, it can have very different psycho-social consequences according to its multifaceted causes.

These range from a persistent feeling of physical insecurity; restrictions in freedom of movement and sense of autonomy; to a diminished sense of self-worth or control. Sleep disturbances are also a frequent consequence of chronic pain.

Due to the high level of suffering of affected patients, well-integrated pain therapy is essential.

**Page 7**

In general, a multimodal treatment is recommended, i.e. a treatment carried out by different groups of practitioners.



1  
2  
3 Physicians investigate the physical causes of the pain and assist patients with medical  
4 treatment.  
5

6 Physiotherapists can practice movement exercises with patients that can enhance their  
7 mobility in everyday life, for example.  
8

9 And psychotherapists work out ways to improve the quality of life of pain patients.  
10

11 Therapy concepts for treating chronic pain continue to develop. However, the multimodal  
12 integration of patients within various treatment groups remains a central concept.  
13  
14  
15  
16  
17  
18  
19  
20  
21  
22  
23  
24  
25  
26  
27  
28  
29  
30  
31  
32  
33  
34  
35  
36  
37  
38  
39  
40  
41  
42  
43  
44  
45  
46  
47  
48  
49  
50  
51  
52  
53  
54  
55  
56  
57  
58  
59  
60

For peer review only

## SUPPLEMENTARY MATERIAL

### Student results

#### Student demographic characteristics

Demographic data of the students can be found in table 3.

**Table 3.** Demographic characteristics of the student sample

| Variables           | Experimental Group | Control Group |
|---------------------|--------------------|---------------|
| Age                 | 23.53 (3.10)       | 23.37 (2.91)  |
| Number (% female)   | 49 (73,47)         | 52 (76,92)    |
| Study time in years | 3.00 (1.69)        | 2.99 (1.49)   |

#### Results of the repeated-measures ANOVA among students

##### *Acceptance*

Student's acceptance could be increased as a result of the video. The 2 x 2 ANOVA revealed a significant main effect of time ( $F(1, 99)=88.95, P<.001, \eta^2_p=.48$ ) as well as a significant time x condition interaction ( $F(1, 99)=15.17, P<.001, \eta^2_p=.13$ ). There was no significant main effect of condition ( $F(1, 99)=1.61, P=.21, \eta^2_p=.02$ ). Table 4 shows the descriptive values of the sample.

**Table 4.** Descriptive representation of the acceptance values.

| Measurement time | Condition | $M^a$ | $SD$ |
|------------------|-----------|-------|------|
| Pre values       | EG        | 9.94  | 2.54 |
|                  | CG        | 9.98  | 2.42 |
| Post values      | EG        | 12.10 | 2.24 |
|                  | CG        | 10.88 | 2.62 |

*Notes.* <sup>a</sup>Values range between 3 and 15;  $M$  = Mean;  $SD$  = Standard deviation; EG = Experimental Group; CG = Control Group.

##### *Performance Expectancy*

We found a similar pattern of results for performance expectancy. There was a significant effect of time ( $F(1, 99)=81.96, P<.001, \eta^2_p=.45$ ) and a significant time x condition interaction ( $F(1, 99)=10.14, P=.002, \eta^2_p=.09$ ). The main effect of condition got not significant ( $F(1, 99)=1.17, P=.28, \eta^2_p=0.1$ ). Table 5 shows the descriptive values of the sample.

**Table 5.** Descriptive representation of the performance expectancy values.

| Measurement time | Condition       | $M^{ab}$ | $SD^c$ |
|------------------|-----------------|----------|--------|
| Pre values       | EG <sup>d</sup> | 9.86     | 2.57   |
|                  | CG <sup>e</sup> | 9.98     | 2.26   |
| Post values      | EG              | 12.14    | 2.02   |
|                  | CG              | 11.08    | 2.61   |

*Notes.* <sup>a</sup>Values range between 3 and 15;  $M$  = Mean;  $SD$  = Standard deviation; EG = Experimental Group; CG = Control Group.

### *Credibility*

The pattern of results for credibility reflects the above as well. We found a significant main effect of time ( $F(1, 99)=149.72, P<.001, \eta^2_p=.60$ ) and a significant time x condition effect ( $F(1, 99)=25.99, P<.001, \eta^2_p=.21$ ). We found no significant main effect of condition ( $F(1, 99)=2.45, P=.12, \eta^2_p=.02$ ). Table 6 shows the descriptive values of the sample.

**Table 6.** Descriptive representation of the credibility values.

| Measurement time | Condition       | $M^{ab}$ | $SD^c$ |
|------------------|-----------------|----------|--------|
| Pre values       | EG <sup>d</sup> | 5,43     | 1,48   |
|                  | CG <sup>e</sup> | 5,53     | 1,37   |
| Post values      | EG              | 7,16     | 1,26   |
|                  | CG              | 6,24     | 1,44   |

*Notes.* <sup>a</sup>Values range between 1 and 10;  $M$  = Mean;  $SD$  = Standard deviation; EG = Experimental Group; CG = Control Group.

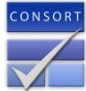

## CONSORT 2010 checklist of information to include when reporting a randomised trial\*

| Section/Topic                    | Item No | Checklist item                                                                                                                                                                              | Reported on page No |
|----------------------------------|---------|---------------------------------------------------------------------------------------------------------------------------------------------------------------------------------------------|---------------------|
| <b>Title and abstract</b>        |         |                                                                                                                                                                                             |                     |
|                                  | 1a      | Identification as a randomised trial in the title                                                                                                                                           | 1                   |
|                                  | 1b      | Structured summary of trial design, methods, results, and conclusions (for specific guidance see CONSORT for abstracts)                                                                     | 1                   |
| <b>Introduction</b>              |         |                                                                                                                                                                                             |                     |
| Background and objectives        | 2a      | Scientific background and explanation of rationale                                                                                                                                          | 3                   |
|                                  | 2b      | Specific objectives or hypotheses                                                                                                                                                           | 3                   |
| <b>Methods</b>                   |         |                                                                                                                                                                                             |                     |
| Trial design                     | 3a      | Description of trial design (such as parallel, factorial) including allocation ratio                                                                                                        | 3                   |
|                                  | 3b      | Important changes to methods after trial commencement (such as eligibility criteria), with reasons                                                                                          | -                   |
| Participants                     | 4a      | Eligibility criteria for participants                                                                                                                                                       | 3                   |
|                                  | 4b      | Settings and locations where the data were collected                                                                                                                                        | 3                   |
| Interventions                    | 5       | The interventions for each group with sufficient details to allow replication, including how and when they were actually administered                                                       | 5                   |
| Outcomes                         | 6a      | Completely defined pre-specified primary and secondary outcome measures, including how and when they were assessed                                                                          | 3                   |
|                                  | 6b      | Any changes to trial outcomes after the trial commenced, with reasons                                                                                                                       | -                   |
| Sample size                      | 7a      | How sample size was determined                                                                                                                                                              | 3                   |
|                                  | 7b      | When applicable, explanation of any interim analyses and stopping guidelines                                                                                                                | -                   |
| <b>Randomisation:</b>            |         |                                                                                                                                                                                             |                     |
| Sequence generation              | 8a      | Method used to generate the random allocation sequence                                                                                                                                      | 2                   |
|                                  | 8b      | Type of randomisation; details of any restriction (such as blocking and block size)                                                                                                         | -                   |
| Allocation concealment mechanism | 9       | Mechanism used to implement the random allocation sequence (such as sequentially numbered containers), describing any steps taken to conceal the sequence until interventions were assigned |                     |
| Implementation                   | 10      | Who generated the random allocation sequence, who enrolled participants, and who assigned participants to interventions                                                                     | 2                   |
| Blinding                         | 11a     | If done, who was blinded after assignment to interventions (for example, participants, care providers, those                                                                                | -                   |

|    |                          |                                                             |                                                                                                                  |    |
|----|--------------------------|-------------------------------------------------------------|------------------------------------------------------------------------------------------------------------------|----|
| 1  |                          | assessing outcomes) and how                                 |                                                                                                                  |    |
| 2  | 11b                      | If relevant, description of the similarity of interventions | 4                                                                                                                |    |
| 3  | Statistical methods      | 12a                                                         | Statistical methods used to compare groups for primary and secondary outcomes                                    | 6  |
| 4  |                          | 12b                                                         | Methods for additional analyses, such as subgroup analyses and adjusted analyses                                 | 6  |
| 5  |                          |                                                             |                                                                                                                  |    |
| 6  | <b>Results</b>           |                                                             |                                                                                                                  |    |
| 7  | Participant flow (a      | 13a                                                         | For each group, the numbers of participants who were randomly assigned, received intended treatment, and         |    |
| 8  | diagram is strongly      |                                                             | were analysed for the primary outcome                                                                            | 6  |
| 9  | recommended)             | 13b                                                         | For each group, losses and exclusions after randomisation, together with reasons                                 | 6  |
| 10 | Recruitment              | 14a                                                         | Dates defining the periods of recruitment and follow-up                                                          | 2  |
| 11 |                          | 14b                                                         | Why the trial ended or was stopped                                                                               | -  |
| 12 | Baseline data            | 15                                                          | A table showing baseline demographic and clinical characteristics for each group                                 | 6  |
| 13 | Numbers analysed         | 16                                                          | For each group, number of participants (denominator) included in each analysis and whether the analysis was      |    |
| 14 |                          |                                                             | by original assigned groups                                                                                      | 2  |
| 15 | Outcomes and             | 17a                                                         | For each primary and secondary outcome, results for each group, and the estimated effect size and its            |    |
| 16 | estimation               |                                                             | precision (such as 95% confidence interval)                                                                      | 7  |
| 17 |                          | 17b                                                         | For binary outcomes, presentation of both absolute and relative effect sizes is recommended                      | -  |
| 18 | Ancillary analyses       | 18                                                          | Results of any other analyses performed, including subgroup analyses and adjusted analyses, distinguishing       |    |
| 19 |                          |                                                             | pre-specified from exploratory                                                                                   | -  |
| 20 | Harms                    | 19                                                          | All important harms or unintended effects in each group (for specific guidance see CONSORT for harms)            | -  |
| 21 |                          |                                                             |                                                                                                                  |    |
| 22 | <b>Discussion</b>        |                                                             |                                                                                                                  |    |
| 23 | Limitations              | 20                                                          | Trial limitations, addressing sources of potential bias, imprecision, and, if relevant, multiplicity of analyses | 10 |
| 24 | Generalisability         | 21                                                          | Generalisability (external validity, applicability) of the trial findings                                        | 10 |
| 25 | Interpretation           | 22                                                          | Interpretation consistent with results, balancing benefits and harms, and considering other relevant evidence    | 8  |
| 26 |                          |                                                             |                                                                                                                  |    |
| 27 | <b>Other information</b> |                                                             |                                                                                                                  |    |
| 28 | Registration             | 23                                                          | Registration number and name of trial registry                                                                   | 2  |
| 29 | Protocol                 | 24                                                          | Where the full trial protocol can be accessed, if available                                                      | -  |
| 30 | Funding                  | 25                                                          | Sources of funding and other support (such as supply of drugs), role of funders                                  | 11 |

36  
37 \*We strongly recommend reading this statement in conjunction with the CONSORT 2010 Explanation and Elaboration for important clarifications on all the items. If relevant, we also  
38 recommend reading CONSORT extensions for cluster randomised trials, non-inferiority and equivalence trials, non-pharmacological treatments, herbal interventions, and pragmatic trials.  
39 Additional extensions are forthcoming: for those and for up to date references relevant to this checklist, see [www.consort-statement.org](http://www.consort-statement.org).  
40  
41  
42

# BMJ Open

## Effects of a video intervention on physicians' acceptance of pain apps: a randomized controlled trial

|                                 |                                                                                                                                                                                                                                                                                                                                                                                                           |
|---------------------------------|-----------------------------------------------------------------------------------------------------------------------------------------------------------------------------------------------------------------------------------------------------------------------------------------------------------------------------------------------------------------------------------------------------------|
| Journal:                        | <i>BMJ Open</i>                                                                                                                                                                                                                                                                                                                                                                                           |
| Manuscript ID                   | bmjopen-2021-060020.R1                                                                                                                                                                                                                                                                                                                                                                                    |
| Article Type:                   | Original research                                                                                                                                                                                                                                                                                                                                                                                         |
| Date Submitted by the Author:   | 25-Feb-2022                                                                                                                                                                                                                                                                                                                                                                                               |
| Complete List of Authors:       | Hein, Hauke; University of Marburg, Department of Clinical Psychology and Psychotherapy<br>Glombiewski, Julia Anna; University Koblenz - Landau, Department of Psychology, Pain and Psychotherapy Research Lab<br>Rief, Winfried; University of Marburg, Department of Clinical Psychology and Psychotherapy<br>Riecke, Jenny; University of Marburg, Department of Clinical Psychology and Psychotherapy |
| <b>Primary Subject Heading</b>: | Medical education and training                                                                                                                                                                                                                                                                                                                                                                            |
| Secondary Subject Heading:      | Communication                                                                                                                                                                                                                                                                                                                                                                                             |
| Keywords:                       | PAIN MANAGEMENT, MEDICAL EDUCATION & TRAINING, EDUCATION & TRAINING (see Medical Education & Training)                                                                                                                                                                                                                                                                                                    |
|                                 |                                                                                                                                                                                                                                                                                                                                                                                                           |

SCHOLARONE™  
Manuscripts



I, the Submitting Author has the right to grant and does grant on behalf of all authors of the Work (as defined in the below author licence), an exclusive licence and/or a non-exclusive licence for contributions from authors who are: i) UK Crown employees; ii) where BMJ has agreed a CC-BY licence shall apply, and/or iii) in accordance with the terms applicable for US Federal Government officers or employees acting as part of their official duties; on a worldwide, perpetual, irrevocable, royalty-free basis to BMJ Publishing Group Ltd ("BMJ") its licensees and where the relevant Journal is co-owned by BMJ to the co-owners of the Journal, to publish the Work in this journal and any other BMJ products and to exploit all rights, as set out in our [licence](#).

The Submitting Author accepts and understands that any supply made under these terms is made by BMJ to the Submitting Author unless you are acting as an employee on behalf of your employer or a postgraduate student of an affiliated institution which is paying any applicable article publishing charge ("APC") for Open Access articles. Where the Submitting Author wishes to make the Work available on an Open Access basis (and intends to pay the relevant APC), the terms of reuse of such Open Access shall be governed by a Creative Commons licence – details of these licences and which [Creative Commons](#) licence will apply to this Work are set out in our licence referred to above.

Other than as permitted in any relevant BMJ Author's Self Archiving Policies, I confirm this Work has not been accepted for publication elsewhere, is not being considered for publication elsewhere and does not duplicate material already published. I confirm all authors consent to publication of this Work and authorise the granting of this licence.

**Title**

Effects of a video intervention on physicians' acceptance of pain apps: a randomized controlled trial

**Corresponding author**

Jenny Riecke  
Gutenbergstraße 18  
Marburg, 35032  
jenny.riecke@staff.uni-marburg.de

**Authors**

Hauke Jeldrik Hein  
Department of Clinical Psychology and Psychotherapy, Philipps-University Marburg

Julia Anna Glombiewski  
Department of Psychology, Pain and Psychotherapy Research Lab, University of Koblenz-Landau

Winfried Rief  
Department of Clinical Psychology and Psychotherapy, Philipps-University Marburg

Jenny Riecke  
Department of Clinical Psychology and Psychotherapy, Philipps-University Marburg

**Word count**

3876



**Keywords**

mHealth; health apps; acceptance; performance expectancy; credibility; chronic pain; physicians

**Abstract****Objectives**

The aim of our study was to determine and enhance physicians' acceptance, performance expectancy and credibility of health apps for chronic pain patients. We further investigated predictors of acceptance.

**Design**

Randomized experimental trial with a parallel-group repeated measures design.

**Setting and participants**

248 physicians working in various, mainly outpatient settings in Germany.

**Intervention and outcome**

Physicians were randomly assigned to either an experimental group (short video about health apps) or a control group (short video about chronic pain). Primary outcome measure was acceptance. Performance expectancy and credibility of health apps were secondary outcomes. In addition, we assessed 101 medical students to evaluate the effectiveness of the video intervention in young professionals.

**Results**

In general, physicians' acceptance of health apps for chronic pain patients was moderate ( $M=9.51$ ,  $SD=3.53$ , scale ranges from 3-15). All primary and secondary outcomes were enhanced by the video intervention: A repeated-measures ANOVA yielded a significant interaction effect for acceptance ( $F(1, 246)=15.28$ ,  $p=.01$ ), performance expectancy ( $F(1, 246)=6.10$ ,  $p=.01$ ) and credibility ( $F(1, 246)=25.61$ ,  $p<.001$ ). The same pattern of results was evident among medical students.

Linear regression analysis revealed credibility ( $\beta=.34$ ,  $p<.001$ ) and performance expectancy ( $\beta .30$ ,  $p<.001$ ) as the two strongest factors influencing acceptance, followed by skepticism ( $\beta=-.18$ ,  $p<.001$ ) and intuitive appeal ( $\beta=.11$ ,  $p=.03$ ).

**Conclusions and recommendations**

Physicians' acceptance of health apps was moderate, and was strengthened by a three minute video. Besides performance expectancy, credibility seems to be a promising factor associated with acceptance. Future research should focus on ways to implement acceptability-increasing interventions into routine care.

**Trial registration:** <https://osf.io/x693r>

**Strengths and limitations of this study**

- This is the first study to examine physicians' acceptance and expectations about health apps for chronic pain.

- 1
- 2
- 3 - A strength of the study is the investigation of both practitioners and medical students as
- 4 future physicians.
- 5
- 6 - The study has a strong active control group.
- 7
- 8 - A limitation is the online-only data collection, due to which a selection bias may have
- 9 occurred.
- 10

## 11 INTRODUCTION

12 Since the Global Burden of Disease Study was first conducted in the 1990s, chronic pain  
13 has been identified as the leading cause of years lived with disability[1]. Chronic pain has  
14 various negative health consequences and adverse impacts on quality of life[2–4].  
15 Although there are effective treatments for chronic pain[5,6], effect sizes tend to be  
16 small[7]. Further, the sustained efficacy of treatments is uncertain[8]. This is problematic,  
17 because chronic pain raises costs dramatically for health care systems[9,10] and is a  
18 significant contributor to work disability[11]. The likelihood of returning to work  
19 correlates with the duration of pain: the longer patients are out of work, the less likely they  
20 are to return to full-time employment[12,13]. Therefore, the principle for treating pain is  
21 that it should start as early as possible. However, many people, especially in rural areas,  
22 have no access to adequate pain treatment[14,15], even though it is considered a human  
23 right[16].

24  
25  
26  
27  
28  
29  
30 Electronic health (eHealth) offerings can help to alleviate these problems and provide  
31 patients with evidence-based interventions[17]. Smartphone apps, falling under the mobile  
32 health (mHealth) category, especially have great potential for both practitioners and  
33 patients[18]: First, because of the widespread use of smartphones, they can reach patients  
34 with chronic pain at a low threshold[19]. Second, they can help patients better manage their  
35 pain, for example as a treatment adjunct or in the absence of a pain expert[20–22]. Pain  
36 apps offer a wide range of application possibilities ranging from diary functions for  
37 monitoring pain to specific interventions. Two recent meta-analyses conclude that pain  
38 apps can reduce patients' pain in the long term[23] and have positive effects on depression  
39 and pain catastrophizing[24]. However, despite their positive potential, it should be  
40 mentioned that most pain apps have not been scientifically evaluated yet and privacy  
41 protection is often not sufficiently guaranteed[25]. Besides these problems, there are  
42 various other barriers to the implementation of health apps into clinical practice.

43  
44  
45  
46  
47  
48 One barrier on the practitioners' side is that they play a gatekeeping role in electronic  
49 treatment forms[26]. Even if physicians consider health apps to be helpful[27], integrating  
50 health apps into their daily work is slow[28]. Although many patients are eager to try health  
51 apps[29] health professionals recommend them seldom[30,31]. One potential reason for  
52 this is their moderate acceptance of eHealth[32]. There is ample evidence that acceptance  
53 is an important prerequisite for implementing new technologies into practice[33,34].  
54  
55  
56  
57  
58  
59  
60

1  
2  
3 Across studies, an important factor influencing acceptance (respective the intention to  
4 apply new technology) is performance expectancy[32,35–38].  
5  
6

7 To increase acceptance, acceptance-enhancing video interventions have proven to be  
8 effective in patients and health practitioners[33,39,40]. However, not all studies were able  
9 to increase practitioners' acceptance [41,42], suggesting that the presentation and content  
10 of educational videos are relevant[33].  
11  
12

13 Since previous research mainly investigated eHealth in general focusing on internet  
14 interventions, little is known about the acceptance of mobile health apps. The main aims  
15 of this study were to assess physicians' acceptance of health apps and to increase their  
16 acceptance, performance expectancy and credibility via a short video intervention. Our  
17 further aim was to identify variables that influence physicians' acceptance of health apps  
18 for chronic pain. To the best of our knowledge, this is the first experimental study assessing  
19 and modifying physicians' acceptance of health apps in the context of chronic pain.  
20  
21  
22  
23

## 24 **METHODS**

### 25 **Study Design**

26 The present study is a web-based experimental trial with a parallel-group design using  
27 simple randomization procedure. Self-rating questionnaires were used to assess pre- and  
28 post-intervention outcomes.  
29  
30

31 The study was preregistered with the Open Science Framework on 12/17/2020 (Trial  
32 Registration Number: <https://osf.io/x693r>). All study participants gave their informed  
33 consent. The survey was approved by the Ethics Committee of Philipps University of  
34 Marburg (reference 2020-72k-2). Completing the survey took an average of 14 minutes.  
35 Measurements were collected online via the software platform Unipark (Enterprise  
36 Feedback Suite survey, version Fall 2020, Questback). Randomization was performed  
37 within the Unipark software. All procedures complied with the German Psychological  
38 Society's ethical guidelines.  
39  
40  
41  
42

### 43 **Participants**

44 Data collection was performed between December 2020 and April 2021. The sample size  
45 was determined using an a priori power analysis with G\*Power version 3.1.9.3[43].  
46 Following a similar preceding study[33], we based our calculations on a small effect  
47 between groups (expected  $f=.16$ ; power=.8; alpha error probability of .05), resulting in a  
48 necessary sample size of 230. Because we assumed a 10% dropout rate, we planned to  
49 survey 253 subjects. We recruited physicians via email distribution lists, physician  
50 networks, and emails to practices. Due to the different recruitment methods, we can only  
51 estimate the number of physicians contacted. We assume that we reached approximately  
52 10000 physicians, of whom 354 started the survey. The response rate is comparable to a  
53  
54  
55  
56  
57  
58  
59

1  
2  
3 similar study[33]. 257 participants completed the questionnaires at post-intervention,  
4 yielding a completion rate of 73% (Figure 1). Inclusion criteria were being employed as a  
5 physician and sufficient knowledge of the German language. Study participants were  
6 collected online through practices, hospitals and medical communities. We additionally  
7 recruited a sample of 101 medical students via Facebook groups for medical students as  
8 well as email distribution lists of medical schools.  
9  
10

11  
12 *[Please insert figure 1 about here]*  
13  
14

## 15 **Measures**

### 16 **Primary Outcome**

17 Acceptance of the Unified Theory of Acceptance and Use of Technology model  
18 (UTAUT)[34] was our primary outcome. Acceptance according to the UTAUT model is  
19 conceived as the intention to use (new) technologies. The three acceptance items (table 1)  
20 were added together as a cumulative score, giving a range of 3 – 15. To make our data  
21 easier to interpret, we considered values as low (3 – 6), moderate (7 – 11) and high (12 –  
22 15). This classification is similar to other studies[32,33]. Cronbach's alpha was .93.  
23  
24  
25  
26

### 27 **Secondary Outcomes**

28 Performance expectancy of the UTAUT model was our secondary outcome. It was  
29 surveyed by means of 3 items (Table 1). Performance expectancy is conceptualized as the  
30 expectation that an intervention will be beneficial.  
31

32 An additional secondary outcome was the credibility of health apps, which we assessed via  
33 the credibility/expectancy questionnaire (CEQ)[44]. The credibility scale (e.g., "*How*  
34 *logical does the medical use of health apps for chronic pain seem to you?*"), includes 3  
35 items and asks about treatment credibility on a 9-point response scale (ranging from 1=not  
36 at all useful to 9=very useful). Cronbach's alpha for the credibility scale was .91.  
37  
38

39 Primary and secondary outcomes were measured both before and after the intervention.  
40 With our medical student cohort, only the primary and secondary outcomes were assessed,  
41 but not the predictors of acceptance.  
42  
43

### 44 **Predictors of acceptance**

45 Predictors of acceptance were examined. For this purpose, we used the baseline variable  
46 of acceptance as dependent variable and multiple predictors as independent variables (see  
47 Statistical Analysis).  
48

49 Socio-demographic variables included age, gender, daily smartphone time and smartphone  
50 use in a professional context. All of the following items had to be slightly adapted for the  
51 purpose of this study.  
52

53 We assessed the four main constructs of UTAUT model[34]. The UTAUT model is an  
54 established model which states that the four constructs performance expectancy  
55  
56  
57  
58  
59  
60

(Cronbach's alpha of .94); effort expectancy (Cronbach's alpha of .84); facilitating conditions (Spearman's correlation of .17); and social influence (Spearman's correlation of .79) have an effect on the acceptance and intention to use (new) technologies. The scales consist of statements (table 1) that can be agreed to on a 5-point response scale (answers ranging from 1=totally disagree to 5=totally agree). Higher values indicate a higher level of the construct. Items were adapted from different studies[39,45,46].

From the Attitudes toward Psychological Online Interventions questionnaire (APOI)[47], we used the skepticism and perception of risks scale, which contains 4 statements (e.g., *"It is difficult for patients to effectively integrate health apps into their daily lives."*) that can be agreed on a 5-point scale (ranging from 1=totally agree to 5=totally disagree). We excluded 1 item because its content did not fit the survey (*"By using a POI [Psychological Online Interventions], I do not receive professional support."*). Cronbach's alpha for this scale was .57.

Openness (e.g., *"I would use new treatments to help my patients."*) and intuitive appeal (e.g., *"If you learned about a new health app, how likely would you be to use it if it appealed to you intuitively?"*) were assessed with the Evidence-based Practice Attitude Scale-36 (EBPAS)[48]. The EBPAS measures difficulties and supportive factors in implementing evidence-based treatment approaches. Both scales consist of 4 statements or questions that can be agreed to on a 5-point response scale (ranging from 0=not at all to 4=to a very great extent). Cronbach's alpha of .84 (openness) and .87 (intuitive appeal). Before starting the survey, we gave participants a brief definition of health apps and instructed them that all questions are related to health apps for chronic pain patients.

**Table 1** UTAUT Items.

| UTAUT Scale            | Items                                                                                                                                                                                                                                                                     |
|------------------------|---------------------------------------------------------------------------------------------------------------------------------------------------------------------------------------------------------------------------------------------------------------------------|
| Acceptance             | <ol style="list-style-type: none"> <li>1. I can basically imagine prescribing a health app.</li> <li>2. I would prescribe health apps regularly.</li> <li>3. I would recommend health apps to colleagues.</li> </ol>                                                      |
| Performance Expectancy | <ol style="list-style-type: none"> <li>1. Using health apps would improve the effectiveness of my work.</li> <li>2. Using health apps would help me in my work and increase my productivity.</li> <li>3. Overall, health apps would help me treat my patients.</li> </ol> |
| Effort Expectancy      | <ol style="list-style-type: none"> <li>1. Using health apps would be easy.</li> <li>2. Using health apps would be easy for me.</li> <li>3. The use of health apps would be clear and understandable to me.</li> </ol>                                                     |
| Social Influence       | <ol style="list-style-type: none"> <li>1. Colleagues would advise me to use health apps.</li> </ol>                                                                                                                                                                       |

|                         |                                                                                                                                 |
|-------------------------|---------------------------------------------------------------------------------------------------------------------------------|
|                         | 2. My supervisors and/or experienced colleagues would recommend that I use health apps.                                         |
| Facilitating Conditions | 1. I would get support for technical problems with health apps.<br>2. I have the necessary technical skills to use health apps. |

*Notes.* Items are adapted from[39,45,46].

### **Intervention**

The control group (CG) watched a video (3:10 minutes) providing general information about chronic pain (e.g., prevalence and costs for the health care system and psychosocial consequences for people suffering from chronic pain). The experimental group (EG) watched a video (3:23 minutes) that discussed the content of health apps (e.g., how they can be used and the results of recent studies). We kept the information of both videos in simple language. In terms of content, the videos only gave a general overview of the topic without going into too much detail. Both videos were matched in terms of visuals (Figure 2). Skipping the video was not possible due to the survey software. We produced the video with the commercial software Powtoon (2012–2021 Powtoon Limited). A professional narrator recorded the audio track. An English translation of the spoken text is in the supplementary material.

*[Please insert figure 2 about here]*

### **Statistical Analysis**

We used the 26th version of IBM SPSS Statistics software for statistical analyses. There were no missing data due to the software (participants had to answer all questions to get to the next page). For all analyses, we used a type-1 error level of 5%.

Both Mahalanobis distance and Cook's distance were used to detect multivariate outliers[49]. According to the suggestion of Pituch and Stevens (2016), univariate outliers were calculated using standardized values[49]. We checked data for plausibility before exclusion. In addition, we checked subjects' comments at the end of the survey for possible bias.

To detect any differences between baseline values, we conducted a multivariate analysis of variance (MANOVA) for age; APOI; EBPAS; CEQ; and the UTAUT variables. We assessed gender differences using a chi-square test.

The video's influence on our primary and secondary outcomes was assessed via a 2 (condition) x 2 (time) repeated measures analysis of variance (ANOVA). Partial eta squared was used as the effect size measure, as suggested by Richardson (2011). Effect sizes were classified according to Richardson[50] based on Cohen[51]. To reduce inflation of the alpha error, we applied Bonferroni correction to secondary outcomes[52].



The variables influencing health apps' acceptance were calculated using linear regression, in which we added predictor groups blockwise: first, demographic variables (age; gender; daily smartphone time; smartphone use in a working context). The APOI, EBPAS, and CEQ scales were then added. Last, the four UTAUT predictors were added to the model. Acceptance from the pre-measurement was the dependent variable[32]. Because of the large number of predictors and resulting overestimation of  $R^2$ , we referred to an adjusted  $R^2$  as the outcome[53].

### Patient and public involvement

No patient involved.

## RESULTS

### Sample Characteristics

After inspecting the data, there was one exclusion because the subject stated that he had filled in the questionnaires arbitrarily. 8 subjects were excluded because they had stated "psychological psychotherapist" as their specialist direction, which in Germany indicates that they were not physicians but psychologists. This reduced our sample to 248 (38.71% female) ( $n_{EG}=124$ ;  $n_{CG}=124$ ). The average age was 49.56 years ( $SD=11.51$ ). There were no baseline differences between conditions. The most common fields of specialization were general practitioners (89); surgeons (39); anesthesiologists (29); neurologists and psychiatrists (23). Acceptance levels at baseline across both conditions were moderate ( $M=9.51$ ,  $SD=3.53$ ) with 21.4% in the low range, 47.1% in the moderate range, and 31.5% in the high range. See table 2 for a complete list of specialty directions, additional demographic variables as well as pre-values of the baseline measures.

**Table 2** Demographic characteristics.

| Variables                          | Experimental Group | Control Group |
|------------------------------------|--------------------|---------------|
| Age                                | 49.65 ± 11.57      | 49.47 ± 11.49 |
| Number (% female)                  | 124 (35.50)        | 124 (41.90)   |
| Professional environment (%)       |                    |               |
| Outpatient                         | 89 (71.8)          | 77 (62.1)     |
| Inpatient                          | 30 (24.2)          | 33 (26.6)     |
| Other                              | 5 (4.0)            | 14 (11.3)     |
| Medical Specialty (%) <sup>a</sup> |                    |               |
| General medicine                   | 49 (39.5)          | 40 (32.3)     |
| Surgery                            | 17 (13.7)          | 22 (17.7)     |
| Neurology                          | 17 (13.7)          | 6 (4.8)       |
| Anesthesiology                     | 11 (8.9)           | 18 (14.5)     |
| Orthopedics                        | 6 (4.8)            | 8 (6.5)       |

|                                       |              |              |
|---------------------------------------|--------------|--------------|
| Pediatrics                            | 5 (4)        | 8 (6.5)      |
| Other                                 | 19 (15.4)    | 22 (17.7)    |
| <hr/>                                 |              |              |
| CEQ                                   |              |              |
| Credibility                           | 5.28 ± 1.78  | 5.14 ± 1.96  |
| <hr/>                                 |              |              |
| APOI                                  |              |              |
| Scepticism and Perception<br>of Risks | 2.66 ± 0.74  | 2.68 ± 0.81  |
| <hr/>                                 |              |              |
| EBPAS                                 |              |              |
| Openness                              | 3.65 ± 0.87  | 3.66 ± 0.93  |
| Intuitive Appeal                      | 3.64 ± 0.88  | 3.57 ± 0.93  |
| <hr/>                                 |              |              |
| UTAUT                                 |              |              |
| Acceptance                            | 9.73 ± 3.33  | 9.30 ± 3.72  |
| Performance Expectancy                | 8.60 ± 3.00  | 8.30 ± 3.10  |
| Effort Expectancy                     | 11.03 ± 2.47 | 10.73 ± 2.42 |
| Social Influence                      | 5.80 ± 2.10  | 5.40 ± 1.95  |
| Facilitating Conditions               | 7.60 ± 1.71  | 7.48 ± 1.95  |

*Notes.* Values represent averages ( $\pm$  standard deviation), frequency or percentages; CEQ=credibility/expectancy questionnaire (range: 1-9); APOI=Attitudes toward Psychological Online Interventions questionnaire (range:1-5); EBPAS=Evidence-based Practice Attitude Scale-36 (range: 0-4); UTAUT=Unified Theory of Acceptance and Use of Technology (Acceptance, Performance Expectancy, Effort Expectancy range: 3-15, Social Influence and Facilitating Conditions range 2-10); <sup>a</sup>Only those medical specialties are listed that were represented by more than 5% in one of the two groups.

### Primary Outcome

Our subjects' acceptance was increased by means of the video (significant main effect of time ( $F(1, 246)=15.28, p<.001, \eta^2_p=.06$ )). Further subjects of the EG showed higher increases than those of the CG (significant time x condition interaction ( $F(1, 246)=15.28, p=.01, \eta^2_p=.02$ )). After the intervention, the EG ( $M=10.51, SD=3.28$ ) had higher post-acceptance scores than the CG ( $M=9.48, SD=3.57$ ) ( $t(246)=-2.37, p=.01$ ). Group comparison of post-assessment data reveals a small effect (Cohen's  $d=.30$ ). Figure 3 shows a comparison between the medical student sample and the physicians.

*[please insert figure 3 about here]*

### Secondary Outcomes

Performance expectancy could also be increased by the video (main effect of time ( $F(1, 246)=66.85, p<.001, \eta^2_p=.21$ )). Again, the increase was higher in the EG than in the CG (significant time x condition interaction ( $F(1, 246)=6.10, p=.01, \eta^2_p=.02$ )). The EG ( $M=9.94, SD=3.16$ ) had higher post-performance expectancy scores than the CG ( $M=9.02,$



1  
2  
3  $SD=3.34$ ) ( $t(246)=-2.23, p=.01$ ). Again, group comparison of the post-assessment data  
4 reveals a small effect (Cohen's  $d=.28$ ).

5  
6 We found the same pattern of results for credibility. It was increased by the video  
7 (significant effect of time ( $F(1, 246)=64.47, p<.001, \eta^2_p=.21$ ), with a higher increase in the  
8 EG (significant time x condition interaction ( $F(1, 246)=25.61, p<.001, \eta^2_p=.09$ )). Post  
9 values of the EG ( $M=6.07, SD=1.87$ ) were higher than those of the CG ( $M=5.31, SD=2.14$ )  
10 ( $t(246)=-2.95, p=.002$ ). Post-assessment group comparison reveals a small to moderate  
11 effect for credibility (Cohen's  $d=.38$ ). Figure 4 shows a comparison between the medical  
12 student sample and the physicians in terms of credibility.  
13  
14

15  
16 *[Please insert figure 4 about here]*  
17  
18

19 The medical students' pattern of results was identical to those illustrated above (see  
20 supplementary material for a detailed presentation of results and demographic variables).  
21 The time x condition interaction effect for acceptance had an effect size of  $\eta^2_p=.13$  (Figure  
22 2); for performance expectancy an effect size of  $\eta^2_p=.09$ ; and for credibility an effect size  
23 of  $\eta^2_p=.21$  (Figure 3).  
24  
25

### 26 27 **Predictors of acceptance**

28 Linear regression with the predictors from the first block was significant ( $R^2_{adj}=.14, F(4,$   
29  $242)=11.01, p<.001$ ). Age ( $\beta=-.23, p=.001$ ) and smartphone use in a professional context  
30 ( $\beta=.20, p=.002$ ) were related to acceptance.  
31

32 The model improved when we added the second block with APOI, EBPAS as well as CEQ  
33 scales ( $R^2_{adj}=.70, F(8, 238)=72.35, p<.001$ ). Credibility ( $\beta=.51, p<.001$ ) was the strongest  
34 predictor followed by skepticism ( $\beta=-.24, p<.001$ ) and intuitive appeal ( $\beta=.13, p=.01$ ).  
35 None of the predictors from the first block were significant.  
36

37 The model improved marginally after adding the UTAUT variables ( $R^2_{adj}=.73, F(12,$   
38  $234)=56.24, p<.001$ ). Again, credibility was the best predictor ( $\beta=.34, p<.001$ ), followed  
39 by performance expectancy ( $\beta=.30, p<.001$ ), skepticism ( $\beta=-.18, p<.001$ ) and intuitive  
40 appeal ( $\beta=.11, p=.03$ ). None of the other predictors were significant. A table with all  
41 predictors is provided in the supplementary material.  
42  
43  
44

### 45 46 **DISCUSSION**

47 The current study is the first to explicitly investigate physicians' acceptance of health apps  
48 focusing on chronic pain. Our results complement preceding studies by adding the  
49 physicians' perspective within an outpatient setting. The main aims of this study were to  
50 survey physicians' current acceptance of health apps for patients with chronic pain and to  
51 increase their acceptance. In general, physicians' and medical students' acceptance for  
52 health apps was moderate, which indicates a higher openness than previous studies[32].  
53 The experimental intervention successfully increased acceptance, performance expectancy  
54  
55  
56  
57  
58  
59  
60

1  
2  
3 and credibility of health apps among physicians and medical students. Our additional study  
4 aim was to identify variables that influence acceptance. Credibility and performance  
5 expectancy were the strongest predictors of acceptance, followed by skepticism and  
6 intuitive appeal.  
7  
8

9  
10 We found that our physicians' moderate acceptance of health apps was higher than that  
11 reported in previous studies: A survey conducted between 2015 and 2016 among various  
12 health care professionals observed rather low acceptance rates for electronic health  
13 interventions[32]. According to a recent study, psychotherapists exhibited mixed  
14 acceptance of blended care (a combination of internet and mobile based interventions and  
15 face-to-face therapy)[33]. However, the aforementioned study was conducted several years  
16 ago and perceptions of eHealth may have changed in the meantime. In particular, the  
17 COVID-19 pandemic may have influenced opinions about electronic health  
18 interventions[54]. Also, unlike the studies mentioned above, we specifically asked about  
19 health apps in our survey.  
20  
21  
22  
23

24 Our results indicate that brief, visually appealing educational videos may be an effective  
25 acceptance-facilitating intervention for physicians. Results from acceptance-enhancing  
26 interventions in other studies were inconclusive. Some researchers demonstrated positive  
27 effects[33], while others identified no effects[41,42]. Most researchers employed video  
28 interventions to increase acceptance toward eHealth interventions in general (e.g. online  
29 interventions) but not by focusing on apps in particular. Another potential explanation of  
30 our positive findings is the specific focus on chronic pain, as the perceived usefulness of  
31 e- and mHealth interventions could be disorder-specific.  
32  
33  
34  
35

36 However, the higher effect sizes of the student sample lead us to cautiously conclude that  
37 the intervention may be more effective with students. Young professionals thus appear to  
38 be more receptive to interventions promoting the acceptance of health apps. This could be  
39 due to a generally higher level of skill and familiarity among the younger sample in using  
40 mobile technologies. Since high acceptance does not automatically lead to action[55], long-  
41 term studies examining the actual use of health apps among (prospective) physicians would  
42 be worthwhile.  
43  
44  
45  
46

47 The strong association we detected between performance expectancy and acceptance is in  
48 line with other research findings. Across studies, performance expectancy has consistently  
49 shown to be one of the most important predictors of acceptance of new technologies in the  
50 healthcare sector[32,37]. This strong association between performance expectancy and  
51 acceptance suggests that physicians' acceptance can be increased by highlighting the  
52 benefits of health apps for their patients and themselves. This is also supported by a study  
53 which found that physicians are more likely to use mobile devices with drug reference  
54  
55  
56  
57  
58  
59  
60

1  
2  
3 software if they believe it will help their patients[56]. In contrast to Hennemann and  
4 colleagues[32], we found no impact of social influence on acceptance, nor did we find any  
5 influence of facilitating conditions as Liu and colleagues did[37]. Note that the subjects in  
6 those two studies were surveyed in inpatient settings. We mainly surveyed physicians in  
7 an outpatient setting. Accordingly, our physicians were probably relying less on their  
8 employer's facilitation because they are often self-employed. The same might apply to  
9 social support: Medical practices employ much less staff than hospitals, a fact that may  
10 have contributed to this construct being less significant in this survey. Additionally, it is  
11 worth mentioning that the two studies above did not specifically survey acceptance towards  
12 health apps and that they were conducted a few years ago. The relevance of certain  
13 constructs like facilitating conditions may have lessened since then.  
14  
15  
16  
17  
18

19 The association we found between credibility and acceptance also concurs with previous  
20 research findings. A study with college students concluded that credibility influences the  
21 perceptions of health apps positively[57]. The credibility of new technologies in the  
22 healthcare field is important[58] as it increases the likelihood that the technology will be  
23 used in the short and long term[59,60]. Accordingly, the low prescription rates (or the  
24 paucity of recommendations) of health apps by physicians could be partly attributable to  
25 their lack of credibility. One potential reason for this is the low quality of many health apps  
26 on the market[61]. Important to the credibility of information about new electronic health  
27 measures is the source of the information. Websites controlled by editors are perceived to  
28 be more credible, as is information from independent medical experts[62]. Because the  
29 source of the material appears to be more important than its design[63], independent  
30 research institutes can play an important role in disseminating evidence-based information  
31 about electronic health care interventions. By including highly visible videos on their  
32 websites, they could increase both the acceptance and awareness of health apps. Our results  
33 indicate that such an approach holds particular promise for medical students, highlighting  
34 the call for establishing eHealth curricula in education[58,64].  
35  
36  
37  
38  
39  
40  
41

42 Technological influences will continue to make strong inroads into medicine[65], which  
43 requires that health care professionals are able to adapt new technologies flexibly.  
44 Especially considering the rapid technological progress in this area, the evidence from  
45 earlier studies and from ours provide valuable information about the importance of  
46 communicating with physicians, psychotherapists, and other professional groups in the  
47 health care sector about eHealth in general and health apps in particular. Video  
48 interventions can be an effective and cost-saving method of communicating the potential,  
49 opportunities, and limitations of these new technologies. They reach the target group at a  
50 low threshold, for example, by being included on informational websites, newsletters or at  
51 training courses. This informational material should emphasize both performance  
52 expectancy and the credibility of the intervention being addressed.  
53  
54  
55  
56  
57  
58  
59  
60

1  
2  
3  
4  
5  
6  
7  
8  
9  
10  
11  
12  
13  
14  
15  
16  
17  
18  
19  
20  
21  
22  
23  
24  
25  
26  
27  
28  
29  
30  
31  
32  
33  
34  
35  
36  
37  
38  
39  
40  
41  
42  
43  
44  
45  
46  
47  
48  
49  
50  
51  
52  
53  
54  
55  
56  
57  
58  
59  
60

In addition to raising acceptance towards health apps, it is also important to provide physicians with specific recommendations on which apps are best to use with which patients. Due to the volume of the still growing market, it is hardly possible for an individual to get a profound overview of the range of health apps available. It therefore seems sensible to establish guidelines for physicians about which apps can be helpful for which problems - just as there are guidelines for medications for diseases. To achieve this, a recent study suggests specific recommendations from medical associations or scientific societies, as well as specialized training in this field[66]. In this way, physicians could be helped to integrate health apps into their workflows[67].

### Limitations

Our study has some limitations. First, there may have been a selection bias due to the data collection method. Thus, physicians who were already open and interested in mHealth may have participated, which would restrict the generalizability of our results. Furthermore, our results relied solely on self-reporting. Most of our items were adaptations of already tested items or scales on questionnaires. This approach was necessary due to the lack of appropriate health app-specific questionnaires, but it remains a limitation. In addition, the scale facilitating conditions had low correlation measures, accordingly results of this scale should be interpreted with caution. Because of the survey's brevity, we could not collect many other potentially relevant constructs like technologization threat[47] or previous experience with health apps. As acceptance due to self-regulatory deficits[68] does not guarantee that intention becomes an action in the future[55], longitudinal surveys to examine whether video interventions increase the actual recommendations or prescriptions of the respective technologies should be one of the next steps in research.

### Strengths

To our knowledge, this is the first study that investigated and increased physicians' acceptance of health apps for managing chronic pain. This professional group is of particular interest due to the gatekeeper role they play in the healthcare system. Furthermore, we based the UTAUT questionnaires on predecessor studies, to increase comparability. In addition, we engaged a strong control group whose intervention was timed, visually, and audibly matched to the intervention video. Despite the brevity of the survey and our strong control group, we identified a superior effect of the intervention video. The video intervention was very short and can be integrated at a low-threshold within different platforms.

### Conclusion

Our results show that physicians are open to using health apps for chronic pain patients as they demonstrated moderate to high acceptance rates. Our study also shows that

1  
2  
3 performance expectancy and credibility had the strongest influence on acceptance. As low-  
4 threshold entities, brief video interventions are useful tools that can strengthen these  
5 constructs and reach a high number of health professionals. They can thus be helpful in  
6 overcoming certain barriers to implementing mobile health interventions in clinical  
7 practice. Future studies should examine the long-term effect of acceptance facilitating  
8 interventions and their impact on behavioral measures.  
9  
10

### 11 12 **Acknowledgements**

13 We would like to thank Nora Jander for her excellent voice-over on the video and Benno  
14 Glöckler and Kari Fuhrmann for their support in recruiting the physicians.  
15  
16

### 17 18 **Disclosure of Interest**

19 None declared.  
20  
21

### 22 23 **Funding**

24 This research received no specific grant from any funding agency in the public, commercial  
25 or not-for-profit sectors.  
26  
27

### 28 29 **Author Contributions**

30 HJH, JAG, WR, JR: Conception and design of the study; HJH: data collection, analysis,  
31 and interpretation, manuscript preparation; JAG, WR, JR: supervision, manuscript editing  
32 and reviewing; JR: project administration. All authors approved the final manuscript.  
33  
34

### 35 36 **Data sharing statement**

37 Data can be shared upon reasonable request. A request can be made to the corresponding  
38 author.  
39  
40

### 41 42 **Legends of the figures**

43 **Figure 1** Flowchart.  
44  
45

46 **Figure 2** Screenshots of the video interventions. Left: Video of the EG describing  
47 possible applications of pain apps; Right: Video of the CG describing psychosocial  
48 consequences of chronic pain.  
49  
50

51 **Figure 3** Level of acceptance. Left: Physicians; Right: Medical students;  
52 EG=Experimental Group; CG=Control Group; pre=Measurement before the video;  
53 post=Measurement after the video; Error bars indicate standard errors; \* $p<.05$ ; \*\* $p<.005$ .  
54  
55  
56  
57  
58  
59  
60

**Figure 4** Level of credibility. Left: Physicians; Right: Medical students; EG=Experimental Group; CG=Control Group; pre=Measurement before the video; post=Measurement after the video; Error bars indicate standard errors; \*\* $p<.001$ .

## References

1. Vos T, Allen C, Arora M, Barber RM, Bhutta ZA, Brown A, et al. Global, regional, and national incidence, prevalence, and years lived with disability for 310 diseases and injuries, 1990–2015: a systematic analysis for the Global Burden of Disease Study 2015. *Lancet* 2016;388:1545–602. [https://doi.org/10.1016/S0140-6736\(16\)31678-6](https://doi.org/10.1016/S0140-6736(16)31678-6).
2. Graham JE, Streitel KL. Sleep quality and acute pain severity among young adults with and without chronic pain: the role of biobehavioral factors. *J Behav Med* 2010;33:335–45. <https://doi.org/10.1007/s10865-010-9263-y>.
3. Ratcliffe GE, Enns MW, Belik S-L, Sareen J. Chronic Pain Conditions and Suicidal Ideation and Suicide Attempts: An Epidemiologic Perspective. *Clin J Pain* 2008;24:204–10. <https://doi.org/10.1097/AJP.0b013e31815ca2a3>.
4. Ryan S, Hill J, Thwaites C, Dawes P. Assessing the effect of fibromyalgia on patients' sexual activity. *Nurs Stand* 2008;23:35–41. <https://doi.org/10.7748/ns2008.09.23.2.35.c6669>.
5. Veehof MM, Trompetter HR, Bohlmeijer ET, Schreurs KMG. Acceptance- and mindfulness-based interventions for the treatment of chronic pain: a meta-analytic review. *Cogn Behav Ther* 2016;45:5–31. <https://doi.org/10.1080/16506073.2015.1098724>.
6. Glombiewski JA, Holzappel S, Riecke J, Vlaeyen JWS, de Jong J, Lemmer G, et al. Exposure and CBT for chronic back pain: An RCT on differential efficacy and optimal length of treatment. *J Consult Clin Psychol* 2018;86:533–45. <https://doi.org/10.1037/ccp0000298>.
7. Williams AC de C, Fisher E, Hearn L, Eccleston C. Psychological therapies for the management of chronic pain (excluding headache) in adults. *Cochrane Database Syst Rev* 2020;2021. <https://doi.org/10.1002/14651858.CD007407.pub4>.
8. Morley S. Relapse prevention: Still neglected after all these years. *Pain* 2008;134:239–40. <https://doi.org/10.1016/j.pain.2007.12.004>.
9. Gaskin DJ, Richard P. The Economic Costs of Pain in the United States. *J Pain* 2012;13:715–24. <https://doi.org/10.1016/j.jpain.2012.03.009>.
10. Leadley RM, Armstrong N, Lee YC, Allen A, Kleijnen J. Chronic Diseases in the European Union: The Prevalence and Health Cost Implications of Chronic Pain. *J Pain Palliat Care Pharmacother* 2012;26:310–25. <https://doi.org/10.3109/15360288.2012.736933>.
11. Landmark T, Romundstad P, Dale O, Borchgrevink PC, Vatten L, Kaasa S. Chronic pain: One year prevalence and associated characteristics (the HUNT pain study). *Scand J Pain* 2013;4:182–7. <https://doi.org/10.1016/j.sjpain.2013.07.022>.
12. Patel S, Greasley K, Watson PJ. Barriers to rehabilitation and return to work for unemployed chronic pain patients: A qualitative study. *Eur J Pain* 2007;11:831–40. <https://doi.org/10.1016/j.ejpain.2006.12.011>.



13. Turner JA. Pain and disability. Clinical, behavioral, and public policy perspectives (Institute of Medicine Committee on pain, disability, and chronic illness behavior). *Pain* 1988;32:385–6. [https://doi.org/10.1016/0304-3959\(88\)90054-1](https://doi.org/10.1016/0304-3959(88)90054-1).
14. Austrian JS, Kerns RD, Carrington Reid M. Perceived Barriers to Trying Self-Management Approaches for Chronic Pain in Older Persons. *J Am Geriatr Soc* 2005;53:856–61. <https://doi.org/10.1111/j.1532-5415.2005.53268.x>.
15. Becker WC, Dorflinger L, Edmond SN, Islam L, Heapy AA, Fraenkel L. Barriers and facilitators to use of non-pharmacological treatments in chronic pain. *BMC Fam Pract* 2017;18:41. <https://doi.org/10.1186/s12875-017-0608-2>.
16. International Pain Summit of the In. Declaration of Montréal: Declaration That Access to Pain Management Is a Fundamental Human Right. *J Pain Palliat Care Pharmacother* 2011;25:29–31. <https://doi.org/10.3109/15360288.2010.547560>.
17. Holmes EA, Ghaderi A, Harmer CJ, Ramchandani PG, Cuijpers P, Morrison AP, et al. The Lancet Psychiatry Commission on psychological treatments research in tomorrow's science. *The Lancet Psychiatry* 2018;5:237–86. [https://doi.org/10.1016/S2215-0366\(17\)30513-8](https://doi.org/10.1016/S2215-0366(17)30513-8).
18. Luxton DD, McCann RA, Bush NE, Mishkind MC, Reger GM. mHealth for mental health: Integrating smartphone technology in behavioral healthcare. *Prof Psychol Res Pract* 2011;42:505–12. <https://doi.org/10.1037/a0024485>.
19. Demiris G, Afrin LB, Speedie S, Courtney KL, Sondhi M, Vimarlund V, et al. Patient-centered Applications: Use of Information Technology to Promote Disease Management and Wellness. A White Paper by the AMIA Knowledge in Motion Working Group. *J Am Med Informatics Assoc* 2008;15:8–13. <https://doi.org/10.1197/jamia.M2492>.
20. Alexander J, Joshi G. Smartphone applications for chronic pain management: a critical appraisal. *J Pain Res* 2016;Volume 9:731–4. <https://doi.org/10.2147/JPR.S119966>.
21. Chhabra HS, Sharma S, Verma S. Smartphone app in self-management of chronic low back pain: a randomized controlled trial. *Eur Spine J* 2018;27:2862–74. <https://doi.org/10.1007/s00586-018-5788-5>.
22. Toelle TR, Utpadel-Fischler DA, Haas K-K, Priebe JA. App-based multidisciplinary back pain treatment versus combined physiotherapy plus online education: a randomized controlled trial. *Npj Digit Med* 2019;2:34. <https://doi.org/10.1038/s41746-019-0109-x>.
23. Pfeifer A-C, Uddin R, Schröder-Pfeifer P, Holl F, Swoboda W, Schiltenswolf M. Mobile Application-Based Interventions for Chronic Pain Patients: A Systematic Review and Meta-Analysis of Effectiveness. *J Clin Med* 2020;9:3557. <https://doi.org/10.3390/jcm9113557>.
24. Moman RN, Dvorkin J, Pollard EM, Wanderman R, Murad MH, Warner DO, et al. A Systematic Review and Meta-analysis of Unguided Electronic and Mobile Health Technologies for Chronic Pain—Is It Time to Start Prescribing Electronic Health Applications? *Pain Med* 2019;20:2238–55. <https://doi.org/10.1093/pm/pnz164>.
25. Terhorst Y, Messner E-M, Schultchen D, Paganini S, Portenhausner A, Eder A-S, et al. Systematic evaluation of content and quality of English and German pain apps in European app stores. *Internet Interv* 2021;24:100376.

- 1  
2  
3  
4  
5  
6  
7  
8  
9  
10  
11  
12  
13  
14  
15  
16  
17  
18  
19  
20  
21  
22  
23  
24  
25  
26  
27  
28  
29  
30  
31  
32  
33  
34  
35  
36  
37  
38  
39  
40  
41  
42  
43  
44  
45  
46  
47  
48  
49  
50  
51  
52  
53  
54  
55  
56  
57  
58  
59  
60
- <https://doi.org/10.1016/j.invent.2021.100376>.
26. Cowan KE, McKean AJ, Gentry MT, Hilty DM. Barriers to Use of Telepsychiatry: Clinicians as Gatekeepers. *Mayo Clin Proc* 2019;94:2510–23. <https://doi.org/10.1016/j.mayocp.2019.04.018>.
27. Kayyali R, Peletidi A, Ismail M, Hashim Z, Bandeira P, Bonnah J. Awareness and Use of mHealth Apps: A Study from England. *Pharmacy* 2017;5:33. <https://doi.org/10.3390/pharmacy5020033>.
28. Anastasiadou D, Folkvord F, Serrano-Troncoso E, Lupiañez-Villanueva F. Mobile Health Adoption in Mental Health: User Experience of a Mobile Health App for Patients With an Eating Disorder. *JMIR MHealth UHealth* 2019;7:e12920. <https://doi.org/10.2196/12920>.
29. Parker SJ, Jessel S, Richardson JE, Reid MC. Older adults are mobile too! Identifying the barriers and facilitators to older adults' use of mHealth for pain management. *BMC Geriatr* 2013;13:43. <https://doi.org/10.1186/1471-2318-13-43>.
30. Byambasuren O, Beller E, Glasziou P. Current Knowledge and Adoption of Mobile Health Apps Among Australian General Practitioners: Survey Study. *JMIR MHealth UHealth* 2019;7:e13199. <https://doi.org/10.2196/13199>.
31. Ross EL, Jamison RN, Nicholls L, Perry BaM, Nolen KD. Clinical Integration of a Smartphone App for Patients With Chronic Pain: Retrospective Analysis of Predictors of Benefits and Patient Engagement Between Clinic Visits. *J Med Internet Res* 2020;22:e16939. <https://doi.org/10.2196/16939>.
32. Hennemann S, Beutel ME, Zwerenz R. Ready for eHealth? Health Professionals' Acceptance and Adoption of eHealth Interventions in Inpatient Routine Care. *J Health Commun* 2017;22:274–84. <https://doi.org/10.1080/10810730.2017.1284286>.
33. Baumeister H, Terhorst Y, Grässle C, Freudenstein M, Nübling R, Ebert DD. Impact of an acceptance facilitating intervention on psychotherapists' acceptance of blended therapy. *PLoS One* 2020;15:e0236995. <https://doi.org/10.1371/journal.pone.0236995>.
34. Venkatesh, Morris, Davis, Davis. User Acceptance of Information Technology: Toward a Unified View. *MIS Q* 2003;27:425. <https://doi.org/10.2307/30036540>.
35. Gagnon M-P, Ngangue P, Payne-Gagnon J, Desmartis M. m-Health adoption by healthcare professionals: a systematic review. *J Am Med Informatics Assoc* 2016;23:212–20. <https://doi.org/10.1093/jamia/ocv052>.
36. Lazuras L, Dokou A. Mental health professionals' acceptance of online counseling. *Technol Soc* 2016;44:10–4. <https://doi.org/10.1016/j.techsoc.2015.11.002>.
37. Liu L, Miguel Cruz A, Rios Rincon A, Buttar V, Ranson Q, Goertzen D. What factors determine therapists' acceptance of new technologies for rehabilitation – a study using the Unified Theory of Acceptance and Use of Technology (UTAUT). *Disabil Rehabil* 2015;37:447–55. <https://doi.org/10.3109/09638288.2014.923529>.
38. Sezgin E, Özkan-Yildirim S, Yildirim S. Investigation of physicians' awareness and use of mHealth apps: A mixed method study. *Heal Policy Technol* 2017;6:251–67. <https://doi.org/10.1016/j.hlpt.2017.07.007>.
39. Baumeister H, Seiffert H, Lin J, Nowoczin L, Lüking M, Ebert D. Impact of an Acceptance Facilitating Intervention on Patients' Acceptance of Internet-based



- 1  
2  
3 Pain Interventions. *Clin J Pain* 2015;31:528–35.  
4 <https://doi.org/10.1097/AJP.000000000000118>.
- 5 40. Lin J, Faust B, Ebert DD, Krämer L, Baumeister H. A Web-Based Acceptance-  
6 Facilitating Intervention for Identifying Patients' Acceptance, Uptake, and  
7 Adherence of Internet- and Mobile-Based Pain Interventions: Randomized  
8 Controlled Trial. *J Med Internet Res* 2018;20:e244.  
9 <https://doi.org/10.2196/jmir.9925>.
- 10 41. Donovan CL, Poole C, Boyes N, Redgate J, March S. Australian mental health  
11 worker attitudes towards cCBT: What is the role of knowledge? Are there  
12 differences? Can we change them? *Internet Interv* 2015;2:372–81.  
13 <https://doi.org/10.1016/j.invent.2015.09.001>.
- 14 42. Schuster R, Pokorny R, Berger T, Topooco N, Laireiter A-R. The Advantages and  
15 Disadvantages of Online and Blended Therapy: Survey Study Amongst Licensed  
16 Psychotherapists in Austria. *J Med Internet Res* 2018;20:e11007.  
17 <https://doi.org/10.2196/11007>.
- 18 43. Faul F, Erdfelder E, Lang A-G, Buchner A. G\*Power 3: A flexible statistical  
19 power analysis program for the social, behavioral, and biomedical sciences. *Behav*  
20 *Res Methods* 2007;39:175–91. <https://doi.org/10.3758/BF03193146>.
- 21 44. Devilly GJ, Borkovec TD. Psychometric properties of the credibility/expectancy  
22 questionnaire. *J Behav Ther Exp Psychiatry* 2000;31:73–86.  
23 [https://doi.org/10.1016/S0005-7916\(00\)00012-4](https://doi.org/10.1016/S0005-7916(00)00012-4).
- 24 45. Baumeister H, Nowoczin L, Lin J, Seifferth H, Seufert J, Laubner K, et al. Impact  
25 of an acceptance facilitating intervention on diabetes patients' acceptance of  
26 Internet-based interventions for depression: A randomized controlled trial.  
27 *Diabetes Res Clin Pract* 2014;105:30–9.  
28 <https://doi.org/10.1016/j.diabres.2014.04.031>.
- 29 46. Ebert DD, Berking M, Cuijpers P, Lehr D, Pörtner M, Baumeister H. Increasing  
30 the acceptance of internet-based mental health interventions in primary care  
31 patients with depressive symptoms. A randomized controlled trial. *J Affect Disord*  
32 2015;176:9–17. <https://doi.org/10.1016/j.jad.2015.01.056>.
- 33 47. Schröder J, Sautier L, Kriston L, Berger T, Meyer B, Späth C, et al. Development  
34 of a questionnaire measuring Attitudes towards Psychological Online  
35 Interventions-the APOI. *J Affect Disord* 2015;187:136–41.  
36 <https://doi.org/10.1016/j.jad.2015.08.044>.
- 37 48. Rye M, Torres EM, Friborg O, Skre I, Aarons GA. The Evidence-based Practice  
38 Attitude Scale-36 (EBPAS-36): A brief and pragmatic measure of attitudes to  
39 evidence-based practice validated in US and Norwegian samples. *Implement Sci*  
40 2017;12:1–11. <https://doi.org/10.1186/s13012-017-0573-0>.
- 41 49. Pituch KA, Stevens JP. Applied multivariate statistics for the social sciences:  
42 Analyses with SAS and IBM's SPSS. 2016.
- 43 50. Richardson JTE. Eta squared and partial eta squared as measures of effect size in  
44 educational research. *Educ Res Rev* 2011;6:135–47.  
45 <https://doi.org/10.1016/j.edurev.2010.12.001>.
- 46 51. Cohen J. *Statistical power analysis for the behavioural sciences*. New York:  
47 Academic Press; 1969.
- 48 52. Armstrong RA. When to use the Bonferroni correction. *Ophthalmic Physiol Opt*  
49  
50  
51  
52  
53  
54  
55  
56  
57  
58  
59  
60

- 2014;34:502–8. <https://doi.org/10.1111/opo.12131>.
53. Miles J. R. -Squared, Adjusted R -Squared. *Encycl. Stat. Behav. Sci.*, vol. 4, Chichester, UK: John Wiley & Sons, Ltd; 2005, p. 1655–7. <https://doi.org/10.1002/0470013192.bsa526>.
54. Wind TR, Rijkeboer M, Andersson G, Riper H. The COVID-19 pandemic: The ‘black swan’ for mental health care and a turning point for e-health. *Internet Interv* 2020;20:100317. <https://doi.org/10.1016/j.invent.2020.100317>.
55. Sheeran P, Webb TL. The Intention-Behavior Gap. *Soc Personal Psychol Compass* 2016;10:503–18. <https://doi.org/10.1111/spc3.12265>.
56. Handler SM, Boyce RD, Ligons FM, Perera S, Nace DA, Hochheiser H. Use and Perceived Benefits of Mobile Devices by Physicians in Preventing Adverse Drug Events in the Nursing Home. *J Am Med Dir Assoc* 2013;14:906–10. <https://doi.org/10.1016/j.jamda.2013.08.014>.
57. Cho J, Lee HE, Quinlan M. Complementary Relationships Between Traditional Media and Health Apps Among American College Students. *J Am Coll Heal* 2015;63:248–57. <https://doi.org/10.1080/07448481.2015.1015025>.
58. van Gemert-Pinjen J, Wynchank S, Covvey H, Ossebaard H. Improving the credibility of electronic health technologies. *Bull World Health Organ* 2012;90:323–323. <https://doi.org/10.2471/BLT.11.099804>.
59. Shin D-H, Lee S, Hwang Y. How do credibility and utility play in the user experience of health informatics services? *Comput Human Behav* 2017;67:292–302. <https://doi.org/10.1016/j.chb.2016.11.007>.
60. Lin J, Wang B, Wang N, Lu Y. Understanding the evolution of consumer trust in mobile commerce: a longitudinal study. *Inf Technol Manag* 2014;15:37–49. <https://doi.org/10.1007/s10799-013-0172-y>.
61. Reynoldson C, Stones C, Allsop M, Gardner P, Bennett MI, Closs SJ, et al. Assessing the Quality and Usability of Smartphone Apps for Pain Self-Management. *Pain Med* 2014;15:898–909. <https://doi.org/10.1111/pme.12327>.
62. Hu Y, Shyam Sundar S. Effects of Online Health Sources on Credibility and Behavioral Intentions. *Communic Res* 2010;37:105–32. <https://doi.org/10.1177/0093650209351512>.
63. Chang Y-S, Zhang Y, Gwizdka J. The effects of information source and eHealth literacy on consumer health information credibility evaluation behavior. *Comput Human Behav* 2021;115:106629. <https://doi.org/10.1016/j.chb.2020.106629>.
64. Gordon WJ, Landman A, Zhang H, Bates DW. Beyond validation: getting health apps into clinical practice. *Npj Digit Med* 2020;3:14. <https://doi.org/10.1038/s41746-019-0212-z>.
65. Seyhan AA, Carini C. Are innovation and new technologies in precision medicine paving a new era in patients centric care? *J Transl Med* 2019;17:114. <https://doi.org/10.1186/s12967-019-1864-9>.
66. Jacob C, Sanchez-Vazquez A, Ivory C. Social, Organizational, and Technological Factors Impacting Clinicians’ Adoption of Mobile Health Tools: Systematic Literature Review. *JMIR MHealth UHealth* 2020;8:e15935. <https://doi.org/10.2196/15935>.
67. Dahlhausen F, Zinner M, Bieske L, Ehlers JP, Boehme P, Fehring L. Physicians’ Attitudes Toward Prescribable mHealth Apps and Implications for Adoption in

- 1  
2  
3 Germany: Mixed Methods Study. JMIR MHealth UHealth 2021;9:e33012.  
4 <https://doi.org/10.2196/33012>.  
5 68. Gollwitzer PM, Sheeran P. Implementation Intentions and Goal Achievement: A  
6 Meta-analysis of Effects and Processes. Adv. Exp. Soc. Psychol., vol. 38, 2006, p.  
7 69–119. [https://doi.org/10.1016/S0065-2601\(06\)38002-1](https://doi.org/10.1016/S0065-2601(06)38002-1).  
8  
9  
10  
11  
12  
13  
14  
15  
16  
17  
18  
19  
20  
21  
22  
23  
24  
25  
26  
27  
28  
29  
30  
31  
32  
33  
34  
35  
36  
37  
38  
39  
40  
41  
42  
43  
44  
45  
46  
47  
48  
49  
50  
51  
52  
53  
54  
55  
56  
57  
58  
59  
60

For peer review only

1  
2  
3  
4  
5  
6  
7  
8  
9  
10  
11  
12  
13  
14  
15  
16  
17  
18  
19  
20  
21  
22  
23  
24  
25  
26  
27  
28  
29  
30  
31

Participants (354)

Exclusion (Survey not completed) (97)

Randomization (257)

Experimental Group (127)

Control Group (130)

Analysis with post data (124)  
- Exclusion due to the profession specified (3)

Analysis with post data (124)  
- Exclusion due to the profession specified (5)  
Other exclusion (1)

1  
2  
3  
4  
5  
6  
7  
8  
9  
10

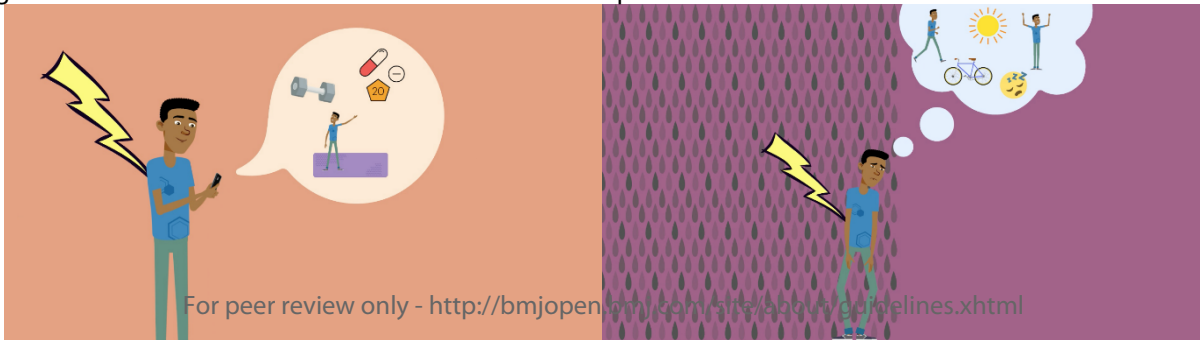

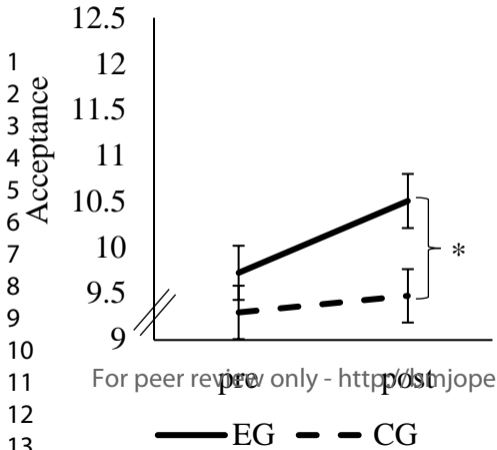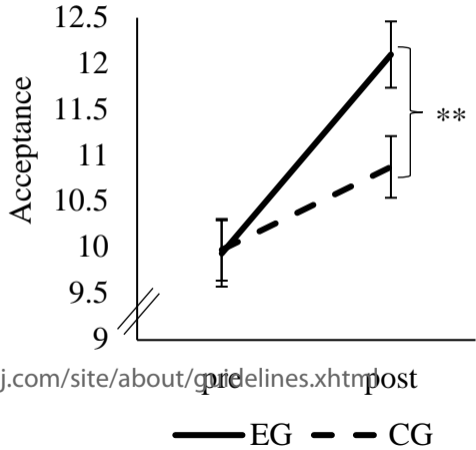

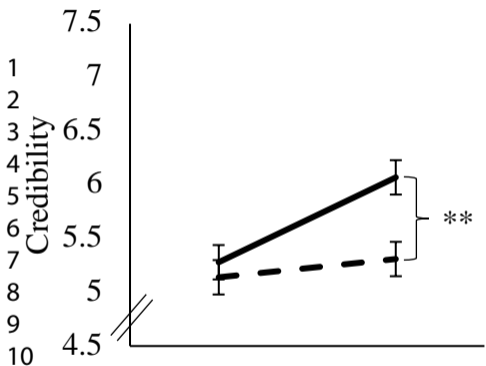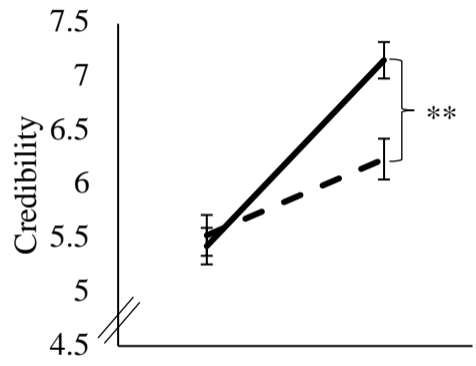

For peer review only - <http://mjoopen.bmj.com/site/about/guidelines.xhtml>

— EG - - CG

— EG - - CG

## SUPPLEMENTARY MATERIAL

### Transcripts and English translations of the video interventions

German transcript of the health app-video

#### Seite 0

Gesundheits-Apps für chronische Schmerzpatient\*innen

#### Seite 1

In diesem Video geht es um Gesundheits-Apps für chronische Schmerzpatient\*innen. Darum, was sie sind, welchen Nutzen Patient\*innen aus ihnen ziehen können und wie der aktuelle Wissenschaftsstand zu ihrer Wirksamkeit aussieht.

#### Seite 2

Ende des Jahres 2019 trat das „Digitale Versorgungs-Gesetz“ in Kraft. Es ermöglicht Ärztinnen und Ärzten ihren Patient\*innen zertifizierte Gesundheits-Apps auf Rezept zu verschreiben.

#### Seite 3

Das Einsatzgebiet von Gesundheits-Apps ist vielfältig.

Sie können etwa nach einem klinischen Aufenthalt zur Nachsorge oder in der ambulanten Versorgung als Therapiebegleitung eingesetzt werden.

Gerade bei chronischen Schmerzen erscheinen Gesundheits-Apps sinnvoll. Sie stehen Patient\*innen jederzeit bei der Bewältigung ihrer Beschwerden zur Verfügung und können beispielsweise bei einem Schmerzschub direkt zur Hand genommen werden.

#### Seite 4

Ziele solcher Apps sind vor allem der Aufbau und die Aufrechterhaltung von Bewältigungsstrategien für den Umgang mit Schmerzen.

Sie können Patient\*innen dabei unterstützen, hinsichtlich ihrer Gesundheitsziele am Ball zu bleiben und ihre mit ihrer Ärztin oder ihrem Arzt vereinbarten Vorsätze zu erreichen. Das kann mittels einer Erinnerungsfunktion, aufgestellten Bewegungsplänen oder ähnlichen geschehen.

Weiterhin können Schmerztagebücher geführt werden, die Patient\*in und Behandler\*in einen visuellen Überblick über den Schmerzverlauf geben.

Darüber hinaus helfen Gesundheits-Apps Patient\*innen dabei, körperliche Übungen durchzuführen – beispielsweise mit unterstützenden Videos.

Sie können auch einen Überblick über die aktuelle Medikation geben. Ebenfalls hilfreich sind vertiefende Hintergrundinformationen, geleitete Entspannungsverfahren oder eine Schritt für Schritt durchgeführte gedankliche Neubewertung der Schmerzsymptome.

#### Seite 5

Mittlerweile gibt es eine ganze Reihe von Studien, die sich mit der Wirksamkeit von Gesundheits-Apps befassen haben.



**Seite 6**

Bereits 2013 zeigten Parker und Kollegen, dass auch ältere, technisch weniger versierte, Patient\*innen an der Nutzung von Gesundheits-Apps zur Unterstützung ihrer Krankheitsbewältigung interessiert sind.

**Seite 7**

Eine Studie aus Norwegen zeigt, dass Patient\*innen, die zusätzlich zur ärztlichen Behandlung eine Smartphone-Intervention nutzten, ihre chronischen Schmerzen eher akzeptieren können und weniger negative Gedanken ihnen gegenüber haben.

**Seite 8**

Toelle und Kollegen zeigten 2019, dass die Behandlung mit einer Gesundheits-App zu einer geringeren Schmerzintensität führt.

**Seite 9**

Weitere Studien zeigen, dass Patient\*innen, die zusätzlich zu ihrer Behandlung Gesundheits-Apps nutzen, zufriedener mit ihrer Behandlung sind... ihren Alltag aktiver gestalten... und ein effektiveres Selbstmanagement haben.

**Seite 10**

Neben diesen Ergebnissen gibt es viele weitere Studien, die sich mit Gesundheits-Apps auseinandersetzen und unser Wissen zu diesem Thema erweitern.

**Seite 11**

Auch wenn es weiterer Forschung bedarf, um das Wirksamkeitspotential von Gesundheits-Apps abschließend einschätzen zu können, sind die bisherigen Studienergebnisse sehr vielversprechend.

Wichtig dabei ist, dass Apps in eine Behandlung eingebunden werden und diese nicht ersetzen sollen.

Ist das gegeben können Apps eine wertvolle Therapiebereicherung sein.

English translation

**Page 0**

Health apps for chronic pain patients

**Page 1**

This video is about health apps for chronic pain patients: what they are, how patients can benefit from them, and what the current state of science is regarding their effectiveness.

**Page 2**

At the end of 2019, the "Digital Care Act" came into force. It enables doctors to prescribe certified health apps to their patients.

**Page 3**

Health apps can be used in a variety of ways.

1  
2  
3 For example, they can be used after a clinical stay for follow-up care or in outpatient care as  
4 therapy support.  
5

6 In the case of chronic pain in particular, health apps seem to be useful. They are available to  
7 patients at any time to help them cope with their symptoms and can, for example, help  
8 immediately in the event of a pain attack.  
9

#### 10 **Page 4**

11 The main aim of such apps is to establish and maintain coping strategies for dealing with pain.  
12

13 They can help patients stay on track with their health goals and achieve the resolutions they  
14 have agreed on with their doctor. This can be done via a reminder function, established  
15 exercise plans, or similar.  
16

17 Furthermore, pain diaries can be used to give patients and doctors a visual overview of their  
18 patient's pain course.  
19

20 In addition, health apps help patients do physical exercises - for example, through supporting  
21 videos.  
22

23 They can also provide an overview of current medication. Other helpful features include in-  
24 depth background information, guided relaxation procedures, or a step-by-step mental re-  
25 evaluation of pain symptoms.  
26

#### 27 **Page 5**

28 Quite a few studies have investigated the effectiveness of health apps.  
29

#### 30 **Page 6**

31 As early as 2013, Parker and colleagues showed that older, less tech-savvy patients are  
32 interested in using health apps to assist with their disease management.  
33

#### 34 **Page 7**

35 A study from Norway showed that patients who used a smartphone intervention in addition to  
36 medical treatment were more likely to accept their chronic pain and have fewer negative  
37 thoughts about it.  
38

#### 39 **Page 8**

40 Toelle and colleagues showed in 2019 that treatment with a health app led to lower pain  
41 intensity.  
42

#### 43 **Page 9**

44 Other studies show that patients who use health apps in addition to their treatment are more  
45 satisfied with their treatment... are more active in their daily lives... and have more effective  
46 self-management.  
47

#### 48 **Page 10**

49 In addition to these findings, many other studies have addressed health apps and deepened our  
50 knowledge on this topic.  
51

#### 52 **Page 11**

1  
2  
3 Although more research is needed to conclusively assess the potential effectiveness of health  
4 apps, the study results to date are very promising.  
5

6 It is important to note that apps should be integrated within treatment and not replace it.  
7

8 If that is the case, apps can be a valuable supplement to therapy.  
9  
10  
11  
12  
13

14 German transcript of the control-video  
15

## 16 Seite 0

17 Chronische Schmerzen  
18

## 19 Seite 1

20 In diesem Video geht es um chronische Schmerzen: Was sie sind und welche Ursachen sie  
21 haben; wie stark ihre Verbreitung in der Bevölkerung ist und welche  
22 Behandlungsmöglichkeiten es gibt.  
23  
24

## 25 Seite 2

26 Von chronischen Schmerzen wird gesprochen, sobald man länger als 6 Monate anhaltende  
27 Schmerzen hat.  
28  
29

30 Chronische Schmerzen können in allen Körperregionen entstehen. Mit Abstand am häufigsten  
31 treten sie jedoch im Rücken auf. Aber auch chronische Kopf- oder Gelenkschmerzen sind keine  
32 Seltenheit.  
33  
34

## 35 Seite 3

36 In der Bevölkerung sind chronische Schmerzen weit verbreitet:  
37

38 Von 900 Patient\*innen in ambulanten Arztpraxen haben 327 chronische Schmerzen – das  
39 entspricht über 36% der Patient\*innen. Insgesamt leiden 12 bis 15 Millionen Menschen in  
40 Deutschland an anhaltenden oder wiederkehrenden Schmerzen. Häufig führen Schmerzen zu  
41 anhaltenden Einschränkungen ihres Arbeits- oder Privatlebens.  
42  
43

44 Gerade Rückenschmerzen stellen ein zentrales Problem dar.  
45

## 46 Seite 4

47 Rückenschmerzen im Allgemeinen und chronische Rückenschmerzen im Speziellen sind der  
48 häufigste Grund für Arbeitsausfälle. Über 12% der deutschen Bevölkerung sieht sich  
49 aufgrund ihrer Rückenschmerzen in ihrer Lebensführung eingeschränkt.  
50  
51

52 Diese Zahlen machen chronische Rückenschmerzen zur teuersten Krankheit der westlichen  
53 Industrieländer.  
54

55 Rückenschmerzen sind also im wortwörtlichen Sinne das Volksleiden Nummer 1 – und das  
56 obwohl die körperliche Belastung der Arbeitnehmer\*innen immer geringer wird.  
57  
58

## 59 Seite 5

Zur Diagnostik chronischer Schmerzen verwendet man unter anderem spezifische Schmerzfragebögen, die die Schmerzintensität, -qualität und -lokalisierung erfassen. Weiterhin wird erhoben, wie stark die Beeinträchtigung in der alltäglichen Lebensführung durch die Schmerzen ist.

Eine gute Diagnostik ist wichtig, da chronische Schmerzen viele Ursachen haben können, wie zum Beispiel:

Nervenschädigungen; Veränderungen in der knöchernen Struktur; psychische Belastungen; Entzündungen; muskuläre Prozesse und weitere.

## Seite 6

Abgesehen davon, dass chronische Schmerzen ein hohes Maß an körperlichen Unbehagen verursachen, können sie entsprechend ihrer vielseitigen Ursachen, sehr unterschiedliche psycho-soziale Folgen haben.

Diese reichen von einem andauernden Gefühl der körperlichen Unsicherheit; Einschränkungen der Bewegungsfreiheit und des Autonomiegefühls bis hin zu einem verringerten Selbstwert- oder Kontrollgefühl. Auch Schlafstörungen sind eine häufige Folge chronischer Schmerzen.

Aufgrund des hohen Leidensdruck betroffener Patient\*innen, ist eine gut eingebundene Behandlung der Schmerzen von hoher Wichtigkeit.

## Seite 7

Ganz allgemein wird eine multimodale Behandlung empfohlen, also eine Behandlung die von verschiedenen Gruppen von Behandler\*innen durchgeführt wird.

Ärzt\*innen untersuchen dabei, welche körperlichen Ursachen die Schmerzen erklären können und stehen Patient\*innen für die medizinische Behandlung zur Seite.

Physiotherapeut\*innen können Bewegungsübungen mit den Patient\*innen einüben, die sie im Alltag z. B. mobiler machen können.

Und Psychotherapeut\*innen erarbeiten Möglichkeiten, die Lebensqualität der Schmerz-Patient\*innen zu verbessern.

Die Therapiekonzepte für die Behandlung chronischer Schmerzen haben sich in den letzten Jahren stetig weiterentwickelt. Die multimodale Einbindung der Patient\*innen in die unterschiedlichen Behandlungsgruppen bleibt aber ein zentrales Konzept.

English translation

## Page 0

Chronic pain

## Page 1

This video is about chronic pain: what it is and what causes it; how prevalent it is in the population; and what treatment options are available.

**Page 2**

Chronic pain is defined as pain that lasts longer than 6 months.

Chronic pain can occur in all regions of the body. However, it occurs by far most frequently in the back. But chronic headaches and joint pain are not uncommon either.

**Page 3**

Chronic pain is widespread in the population:

Out of 900 patients\* in outpatient medical practices, 327 have chronic pain - this corresponds to over 36% of patients. In total, 12 to 15 million people in Germany suffer from persistent or recurring pain. Pain often leads to persistent restrictions in their work or private life.

Back pain in particular is a major problem.

**Page 4**

Back pain in general and chronic back pain in particular are the most common reason for lost work days. More than 12% of the German population feels that their lifestyle is restricted because of their back pain.

These figures make chronic back pain the most expensive disease in Western industrialized countries.

Back pain is therefore literally the number one health problem among the population - despite the fact that the amount of physical strain on employees keeps dropping.

**Page 5**

To diagnose chronic pain, specific pain questionnaires are used that record pain intensity, quality and location. The extent to which the pain interferes with everyday life is also assessed.

A good diagnosis is important, because chronic pain can have many causes, such as: nerve damage, anomalies in the bony structure, psychological stress, inflammation, muscular processes, etc.

**Page 6**

Apart from the fact that chronic pain causes such physical discomfort, it can have very different psycho-social consequences according to its multifaceted causes.

These range from a persistent feeling of physical insecurity; restrictions in freedom of movement and sense of autonomy; to a diminished sense of self-worth or control. Sleep disturbances are also a frequent consequence of chronic pain.

Due to the high level of suffering of affected patients, well-integrated pain therapy is essential.

**Page 7**

In general, a multimodal treatment is recommended, i.e. a treatment carried out by different groups of practitioners.

1  
2  
3 Physicians investigate the physical causes of the pain and assist patients with medical  
4 treatment.  
5

6 Physiotherapists can practice movement exercises with patients that can enhance their  
7 mobility in everyday life, for example.  
8

9 And psychotherapists work out ways to improve the quality of life of pain patients.  
10

11 Therapy concepts for treating chronic pain continue to develop. However, the multimodal  
12 integration of patients within various treatment groups remains a central concept.  
13  
14  
15  
16  
17  
18  
19  
20  
21  
22  
23  
24  
25  
26  
27  
28  
29  
30  
31  
32  
33  
34  
35  
36  
37  
38  
39  
40  
41  
42  
43  
44  
45  
46  
47  
48  
49  
50  
51  
52  
53  
54  
55  
56  
57  
58  
59  
60

## SUPPLEMENTARY MATERIAL

### Student results

Student demographic characteristics

Demographic data of the students can be found in table 3.

**Table 3.** Demographic characteristics of the student sample

| Variables           | Experimental Group | Control Group |
|---------------------|--------------------|---------------|
| Age                 | 23.53 (3.10)       | 23.37 (2.91)  |
| Number (% female)   | 49 (73.47)         | 52 (76.92)    |
| Study time in years | 3.00 (1.69)        | 2.99 (1.49)   |

Results of the repeated-measures ANOVA among students

#### Acceptance

Student's acceptance could be increased as a result of the video. The 2 x 2 ANOVA revealed a significant main effect of time ( $F(1, 99)=88.95, p<.001, \eta_p^2=.48$ ) as well as a significant time x condition interaction ( $F(1, 99)=15.17, p<.001, \eta_p^2=.13$ ). There was no significant main effect of condition ( $F(1, 99)=1.61, p=.21, \eta_p^2=.02$ ). Table 4 shows the descriptive values of the sample.

**Table 4.** Descriptive representation of the acceptance values.

| Measurement time | Condition | $M^a$ | $SD$ |
|------------------|-----------|-------|------|
| Pre values       | EG        | 9.94  | 2.54 |
|                  | CG        | 9.98  | 2.42 |
| Post values      | EG        | 12.10 | 2.24 |
|                  | CG        | 10.88 | 2.62 |

*Notes.* <sup>a</sup>Values range between 3 and 15;  $M$  = Mean;  $SD$  = Standard deviation; EG = Experimental Group; CG = Control Group.

#### Performance Expectancy

We found a similar pattern of results for performance expectancy. There was a significant effect of time ( $F(1, 99)=81.96, p<.001, \eta_p^2=.45$ ) and a significant time x condition interaction ( $F(1, 99)=10.14, p=.002, \eta_p^2=.09$ ). The main effect of condition got not significant ( $F(1, 99)=1.17, p=.28, \eta_p^2=0.1$ ). Table 5 shows the descriptive values of the sample.

**Table 5.** Descriptive representation of the performance expectancy values.

| Measurement time | Condition       | $M^{ab}$ | $SD^c$ |
|------------------|-----------------|----------|--------|
| Pre values       | EG <sup>d</sup> | 9.86     | 2.57   |
|                  | CG <sup>e</sup> | 9.98     | 2.26   |
| Post values      | EG              | 12.14    | 2.02   |
|                  | CG              | 11.08    | 2.61   |

*Notes.* <sup>a</sup>Values range between 3 and 15;  $M$  = Mean;  $SD$  = Standard deviation; EG = Experimental Group; CG = Control Group.

### *Credibility*

The pattern of results for credibility reflects the above as well. We found a significant main effect of time ( $F(1, 99)=149.72, p<.001, \eta_p^2=.60$ ) and a significant time x condition effect ( $F(1, 99)=25.99, p<.001, \eta_p^2=.21$ ). We found no significant main effect of condition ( $F(1, 99)=2.45, p=.12, \eta_p^2=.02$ ). Table 6 shows the descriptive values of the sample.

**Table 6.** Descriptive representation of the credibility values.

| Measurement time | Condition       | $M^{ab}$ | $SD^c$ |
|------------------|-----------------|----------|--------|
| Pre values       | EG <sup>d</sup> | 5.43     | 1.48   |
|                  | CG <sup>e</sup> | 5.53     | 1.37   |
| Post values      | EG              | 7.16     | 1.26   |
|                  | CG              | 6.24     | 1.44   |

*Notes.* <sup>a</sup>Values range between 1 and 10;  $M$  = Mean;  $SD$  = Standard deviation; EG = Experimental Group; CG = Control Group.



1  
2  
3 **SUPPLEMENTARY MATERIAL**  
4

5 **Summary of linear regression**  
6  
7

8 **Table 7.** Summary of linear regression predicting acceptance towards pain apps.  
9

10

| 11 <b>Predictor</b>                                   | 12 <b><i>B</i></b> | 13 <b><i>SE</i><sup>a</sup></b> | 14 <b><math>\beta</math></b> | 15 <b><i>t</i></b> | 16 <b><i>p</i></b> |
|-------------------------------------------------------|--------------------|---------------------------------|------------------------------|--------------------|--------------------|
| 17 Block 1                                            |                    |                                 |                              |                    |                    |
| 18 Age                                                | -.01               | .01                             | -.03                         | -.73               | .47                |
| 19 Sex                                                | .09                | .26                             | .01                          | .36                | .72                |
| 20 Daily Smartphone time                              | -.01               | .20                             | -.002                        | -.04               | .96                |
| 21 Professional smartphone use                        | .18                | .11                             | .06                          | 1.63               | .10                |
| 22 Block 2                                            |                    |                                 |                              |                    |                    |
| 23 Scepticism and Perception<br>of Risks <sup>b</sup> | -.82               | .20                             | -.18                         | -4.13              | >.001              |
| 24 Openness <sup>c</sup>                              | .19                | .16                             | .05                          | 1.17               | .25                |
| 25 Intuitive Appeal <sup>c</sup>                      | .432               | .20                             | .11                          | 2.15               | .03                |
| 26 Credibility <sup>d</sup>                           | .64                | .11                             | .34                          | 5.71               | >.001              |
| 27 Block 3                                            |                    |                                 |                              |                    |                    |
| 28 Performance Expectancy                             | .34                | .07                             | .30                          | 5.32               | >.001              |
| 29 Effort Expectancy                                  | .07                | .07                             | .05                          | 1.00               | .32                |
| 30 Social Influence                                   | -.06               | .07                             | -.03                         | -.77               | .44                |
| 31 Facilitating Conditions                            | -.001              | .08                             | .00                          | -.01               | .99                |

32

33 *Notes.* <sup>a</sup>Standard error; <sup>b</sup>Attitudes toward Psychological Online Interventions questionnaire;  
34 <sup>c</sup>Evidence-based Practice Attitude Scale-36; <sup>d</sup>Credibility/Expectancy Questionnaire.  
35  
36  
37  
38  
39  
40  
41  
42  
43  
44  
45  
46  
47  
48  
49  
50  
51  
52  
53  
54  
55  
56  
57  
58  
59  
60

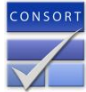

## CONSORT 2010 checklist of information to include when reporting a randomised trial\*

| Section/Topic                    | Item No | Checklist item                                                                                                                                                                              | Reported on page No |
|----------------------------------|---------|---------------------------------------------------------------------------------------------------------------------------------------------------------------------------------------------|---------------------|
| <b>Title and abstract</b>        |         |                                                                                                                                                                                             |                     |
|                                  | 1a      | Identification as a randomised trial in the title                                                                                                                                           | 1                   |
|                                  | 1b      | Structured summary of trial design, methods, results, and conclusions (for specific guidance see CONSORT for abstracts)                                                                     | 2                   |
| <b>Introduction</b>              |         |                                                                                                                                                                                             |                     |
| Background and objectives        | 2a      | Scientific background and explanation of rationale                                                                                                                                          | 3                   |
|                                  | 2b      | Specific objectives or hypotheses                                                                                                                                                           | 4                   |
| <b>Methods</b>                   |         |                                                                                                                                                                                             |                     |
| Trial design                     | 3a      | Description of trial design (such as parallel, factorial) including allocation ratio                                                                                                        | 4                   |
|                                  | 3b      | Important changes to methods after trial commencement (such as eligibility criteria), with reasons                                                                                          | -                   |
| Participants                     | 4a      | Eligibility criteria for participants                                                                                                                                                       | 4                   |
|                                  | 4b      | Settings and locations where the data were collected                                                                                                                                        | 4                   |
| Interventions                    | 5       | The interventions for each group with sufficient details to allow replication, including how and when they were actually administered                                                       | 5                   |
| Outcomes                         | 6a      | Completely defined pre-specified primary and secondary outcome measures, including how and when they were assessed                                                                          | 5                   |
|                                  | 6b      | Any changes to trial outcomes after the trial commenced, with reasons                                                                                                                       | -                   |
| Sample size                      | 7a      | How sample size was determined                                                                                                                                                              | 4                   |
|                                  | 7b      | When applicable, explanation of any interim analyses and stopping guidelines                                                                                                                | -                   |
| <b>Randomisation:</b>            |         |                                                                                                                                                                                             |                     |
| Sequence generation              | 8a      | Method used to generate the random allocation sequence                                                                                                                                      | 4                   |
|                                  | 8b      | Type of randomisation; details of any restriction (such as blocking and block size)                                                                                                         | -                   |
| Allocation concealment mechanism | 9       | Mechanism used to implement the random allocation sequence (such as sequentially numbered containers), describing any steps taken to conceal the sequence until interventions were assigned |                     |
| Implementation                   | 10      | Who generated the random allocation sequence, who enrolled participants, and who assigned participants to interventions                                                                     | 4                   |
| Blinding                         | 11a     | If done, who was blinded after assignment to interventions (for example, participants, care providers, those                                                                                | -                   |

|    |                          |                                                             |                                                                                                                  |
|----|--------------------------|-------------------------------------------------------------|------------------------------------------------------------------------------------------------------------------|
| 1  |                          | assessing outcomes) and how                                 |                                                                                                                  |
| 2  | 11b                      | If relevant, description of the similarity of interventions | 7                                                                                                                |
| 3  | Statistical methods      | 12a                                                         | Statistical methods used to compare groups for primary and secondary outcomes                                    |
| 4  |                          | 12b                                                         | Methods for additional analyses, such as subgroup analyses and adjusted analyses                                 |
| 5  |                          |                                                             |                                                                                                                  |
| 6  | <b>Results</b>           |                                                             |                                                                                                                  |
| 7  | Participant flow (a      | 13a                                                         | For each group, the numbers of participants who were randomly assigned, received intended treatment, and         |
| 8  | diagram is strongly      |                                                             | were analysed for the primary outcome                                                                            |
| 9  | recommended)             | 13b                                                         | For each group, losses and exclusions after randomisation, together with reasons                                 |
| 10 | Recruitment              | 14a                                                         | Dates defining the periods of recruitment and follow-up                                                          |
| 11 |                          | 14b                                                         | Why the trial ended or was stopped                                                                               |
| 12 | Baseline data            | 15                                                          | A table showing baseline demographic and clinical characteristics for each group                                 |
| 13 | Numbers analysed         | 16                                                          | For each group, number of participants (denominator) included in each analysis and whether the analysis was      |
| 14 |                          |                                                             | by original assigned groups                                                                                      |
| 15 | Outcomes and             | 17a                                                         | For each primary and secondary outcome, results for each group, and the estimated effect size and its            |
| 16 | estimation               |                                                             | precision (such as 95% confidence interval)                                                                      |
| 17 |                          | 17b                                                         | For binary outcomes, presentation of both absolute and relative effect sizes is recommended                      |
| 18 | Ancillary analyses       | 18                                                          | Results of any other analyses performed, including subgroup analyses and adjusted analyses, distinguishing       |
| 19 |                          |                                                             | pre-specified from exploratory                                                                                   |
| 20 | Harms                    | 19                                                          | All important harms or unintended effects in each group (for specific guidance see CONSORT for harms)            |
| 21 |                          |                                                             |                                                                                                                  |
| 22 | <b>Discussion</b>        |                                                             |                                                                                                                  |
| 23 | Limitations              | 20                                                          | Trial limitations, addressing sources of potential bias, imprecision, and, if relevant, multiplicity of analyses |
| 24 | Generalisability         | 21                                                          | Generalisability (external validity, applicability) of the trial findings                                        |
| 25 | Interpretation           | 22                                                          | Interpretation consistent with results, balancing benefits and harms, and considering other relevant evidence    |
| 26 |                          |                                                             |                                                                                                                  |
| 27 | <b>Other information</b> |                                                             |                                                                                                                  |
| 28 | Registration             | 23                                                          | Registration number and name of trial registry                                                                   |
| 29 | Protocol                 | 24                                                          | Where the full trial protocol can be accessed, if available                                                      |
| 30 | Funding                  | 25                                                          | Sources of funding and other support (such as supply of drugs), role of funders                                  |
| 31 |                          |                                                             |                                                                                                                  |
| 32 |                          |                                                             |                                                                                                                  |
| 33 |                          |                                                             |                                                                                                                  |
| 34 |                          |                                                             |                                                                                                                  |
| 35 |                          |                                                             |                                                                                                                  |
| 36 |                          |                                                             |                                                                                                                  |
| 37 |                          |                                                             |                                                                                                                  |
| 38 |                          |                                                             |                                                                                                                  |
| 39 |                          |                                                             |                                                                                                                  |
| 40 |                          |                                                             |                                                                                                                  |
| 41 |                          |                                                             |                                                                                                                  |
| 42 |                          |                                                             |                                                                                                                  |
| 43 |                          |                                                             |                                                                                                                  |
| 44 |                          |                                                             |                                                                                                                  |
| 45 |                          |                                                             |                                                                                                                  |
| 46 |                          |                                                             |                                                                                                                  |

\*We strongly recommend reading this statement in conjunction with the CONSORT 2010 Explanation and Elaboration for important clarifications on all the items. If relevant, we also recommend reading CONSORT extensions for cluster randomised trials, non-inferiority and equivalence trials, non-pharmacological treatments, herbal interventions, and pragmatic trials. Additional extensions are forthcoming: for those and for up to date references relevant to this checklist, see [www.consort-statement.org](http://www.consort-statement.org).

# BMJ Open

## Effects of a video intervention on physicians' acceptance of pain apps: a randomized controlled trial

|                                 |                                                                                                                                                                                                                                                                                                                                                                                                           |
|---------------------------------|-----------------------------------------------------------------------------------------------------------------------------------------------------------------------------------------------------------------------------------------------------------------------------------------------------------------------------------------------------------------------------------------------------------|
| Journal:                        | <i>BMJ Open</i>                                                                                                                                                                                                                                                                                                                                                                                           |
| Manuscript ID                   | bmjopen-2021-060020.R2                                                                                                                                                                                                                                                                                                                                                                                    |
| Article Type:                   | Original research                                                                                                                                                                                                                                                                                                                                                                                         |
| Date Submitted by the Author:   | 21-Mar-2022                                                                                                                                                                                                                                                                                                                                                                                               |
| Complete List of Authors:       | Hein, Hauke; University of Marburg, Department of Clinical Psychology and Psychotherapy<br>Glombiewski, Julia Anna; University Koblenz - Landau, Department of Psychology, Pain and Psychotherapy Research Lab<br>Rief, Winfried; University of Marburg, Department of Clinical Psychology and Psychotherapy<br>Riecke, Jenny; University of Marburg, Department of Clinical Psychology and Psychotherapy |
| <b>Primary Subject Heading</b>: | Medical education and training                                                                                                                                                                                                                                                                                                                                                                            |
| Secondary Subject Heading:      | Communication                                                                                                                                                                                                                                                                                                                                                                                             |
| Keywords:                       | PAIN MANAGEMENT, MEDICAL EDUCATION & TRAINING, EDUCATION & TRAINING (see Medical Education & Training)                                                                                                                                                                                                                                                                                                    |
|                                 |                                                                                                                                                                                                                                                                                                                                                                                                           |

SCHOLARONE™  
Manuscripts



I, the Submitting Author has the right to grant and does grant on behalf of all authors of the Work (as defined in the below author licence), an exclusive licence and/or a non-exclusive licence for contributions from authors who are: i) UK Crown employees; ii) where BMJ has agreed a CC-BY licence shall apply, and/or iii) in accordance with the terms applicable for US Federal Government officers or employees acting as part of their official duties; on a worldwide, perpetual, irrevocable, royalty-free basis to BMJ Publishing Group Ltd ("BMJ") its licensees and where the relevant Journal is co-owned by BMJ to the co-owners of the Journal, to publish the Work in this journal and any other BMJ products and to exploit all rights, as set out in our [licence](#).

The Submitting Author accepts and understands that any supply made under these terms is made by BMJ to the Submitting Author unless you are acting as an employee on behalf of your employer or a postgraduate student of an affiliated institution which is paying any applicable article publishing charge ("APC") for Open Access articles. Where the Submitting Author wishes to make the Work available on an Open Access basis (and intends to pay the relevant APC), the terms of reuse of such Open Access shall be governed by a Creative Commons licence – details of these licences and which [Creative Commons](#) licence will apply to this Work are set out in our licence referred to above.

Other than as permitted in any relevant BMJ Author's Self Archiving Policies, I confirm this Work has not been accepted for publication elsewhere, is not being considered for publication elsewhere and does not duplicate material already published. I confirm all authors consent to publication of this Work and authorise the granting of this licence.

**Title**

Effects of a video intervention on physicians' acceptance of pain apps: a randomized controlled trial

**Corresponding author**

Jenny Riecke  
Gutenbergstraße 18  
Marburg, 35032  
jenny.riecke@staff.uni-marburg.de

**Authors**

Hauke Jeldrik Hein  
Department of Clinical Psychology and Psychotherapy, Philipps-University Marburg

Julia Anna Glombiewski  
Department of Psychology, Pain and Psychotherapy Research Lab, University of Koblenz-Landau

Winfried Rief  
Department of Clinical Psychology and Psychotherapy, Philipps-University Marburg

Jenny Riecke  
Department of Clinical Psychology and Psychotherapy, Philipps-University Marburg

**Word count**

3932

**Keywords**

mHealth; health apps; acceptance; performance expectancy; credibility; chronic pain; physicians

**Abstract****Objectives**

The aim of our study was to determine and enhance physicians' acceptance, performance expectancy and credibility of health apps for chronic pain patients. We further investigated predictors of acceptance.

**Design**

Randomized experimental trial with a parallel-group repeated measures design.

**Setting and participants**

248 physicians working in various, mainly outpatient settings in Germany.

**Intervention and outcome**

Physicians were randomly assigned to either an experimental group (short video about health apps) or a control group (short video about chronic pain). Primary outcome measure was acceptance. Performance expectancy and credibility of health apps were secondary outcomes. In addition, we assessed 101 medical students to evaluate the effectiveness of the video intervention in young professionals.

**Results**

In general, physicians' acceptance of health apps for chronic pain patients was moderate ( $M=9.51$ ,  $SD=3.53$ , scale ranges from 3-15). All primary and secondary outcomes were enhanced by the video intervention: A repeated-measures ANOVA yielded a significant interaction effect for acceptance ( $F(1, 246)=15.28$ ,  $p=.01$ ), performance expectancy ( $F(1, 246)=6.10$ ,  $p=.01$ ) and credibility ( $F(1, 246)=25.61$ ,  $p<.001$ ). The same pattern of results was evident among medical students.

Linear regression analysis revealed credibility ( $\beta=.34$ ,  $p<.001$ ) and performance expectancy ( $\beta .30$ ,  $p<.001$ ) as the two strongest factors influencing acceptance, followed by skepticism ( $\beta=-.18$ ,  $p<.001$ ) and intuitive appeal ( $\beta=.11$ ,  $p=.03$ ).

**Conclusions and recommendations**

Physicians' acceptance of health apps was moderate, and was strengthened by a three minute video. Besides performance expectancy, credibility seems to be a promising factor associated with acceptance. Future research should focus on ways to implement acceptability-increasing interventions into routine care.

**Trial registration:** <https://osf.io/x693r>

**Strengths and limitations of this study**

- This is the first study to examine physicians' acceptance and expectations about health apps for chronic pain.

- 1 - A strength of the study is the investigation of both practitioners and medical students as
- 2 future physicians.
- 3 - The study has a strong active control group.
- 4 - A limitation is the online-only data collection, due to which a selection bias may have
- 5 occurred.
- 6
- 7
- 8
- 9

## 10 INTRODUCTION

11 Since the Global Burden of Disease Study was first conducted in the 1990s, chronic pain  
12 has been identified as the leading cause of years lived with disability[1]. Chronic pain has  
13 various negative health consequences and adverse impacts on quality of life[2–4].  
14 Although there are effective treatments for chronic pain[5,6], effect sizes tend to be  
15 small[7]. Further, the sustained efficacy of treatments is uncertain[8]. This is problematic,  
16 because chronic pain raises costs dramatically for health care systems[9,10] and is a  
17 significant contributor to work disability[11]. The likelihood of returning to work  
18 correlates with the duration of pain: the longer patients are out of work, the less likely they  
19 are to return to full-time employment[12,13]. Therefore, the principle for treating pain is  
20 that it should start as early as possible. However, many people, especially in rural areas,  
21 have no access to adequate pain treatment[14,15], even though it is considered a human  
22 right[16].

23  
24  
25  
26  
27  
28  
29  
30  
31 Electronic health (eHealth) offerings can help to alleviate these problems and provide  
32 patients with evidence-based interventions[17]. Smartphone apps, falling under the mobile  
33 health (mHealth) category, especially have great potential for both practitioners and  
34 patients[18]: First, because of the widespread use of smartphones, they can reach patients  
35 with chronic pain at a low threshold[19]. Second, they can help patients better manage their  
36 pain, for example as a treatment adjunct or in the absence of a pain expert[20–22]. Pain  
37 apps offer a wide range of application possibilities ranging from diary functions for  
38 monitoring pain to specific interventions. Two recent meta-analyses concluded that pain  
39 apps can reduce patients' pain by a small effect[23] and have a small positive effect on  
40 depression and short-term pain catastrophizing[24]. However, despite their positive  
41 potential, it should be mentioned that most pain apps have not been scientifically evaluated  
42 yet and privacy protection is often not sufficiently guaranteed[25]. Besides these problems,  
43 there are various other barriers to the implementation of health apps into clinical practice.

44  
45  
46  
47  
48 One barrier on the practitioners' side is that they play a gatekeeping role in electronic  
49 treatment forms[26]. Even if physicians consider health apps to be helpful[27], integrating  
50 health apps into their daily work is slow[28]. Although many patients are eager to try health  
51 apps[29] health professionals recommend them seldom[30,31]. One potential reason for  
52 this is their moderate acceptance of eHealth[32]. There is ample evidence that acceptance  
53 is an important prerequisite for implementing new technologies into practice[33,34].  
54  
55  
56  
57  
58  
59  
60



1  
2  
3 Across studies, an important factor influencing acceptance (respective the intention to  
4 apply new technology) is performance expectancy[32,35–38].  
5  
6

7 To increase acceptance, acceptance-enhancing video interventions have proven to be  
8 effective in patients and health practitioners[33,39,40]. However, not all studies were able  
9 to increase practitioners' acceptance [41,42], suggesting that the presentation and content  
10 of educational videos are relevant[33].  
11  
12

13 Since previous research mainly investigated eHealth in general focusing on internet  
14 interventions, little is known about the acceptance of mobile health apps. The main aims  
15 of this study were to assess physicians' acceptance of health apps and to increase their  
16 acceptance, performance expectancy and credibility via a short video intervention. Our  
17 further aim was to identify variables that influence physicians' acceptance of health apps  
18 for chronic pain. To the best of our knowledge, this is the first experimental study assessing  
19 and modifying physicians' acceptance of health apps in the context of chronic pain.  
20  
21  
22  
23

## 24 **METHODS**

### 25 **Study Design**

26 The present study is a web-based experimental trial with a parallel-group design using  
27 simple randomization procedure (1:1 allocation ratio). Self-rating questionnaires were used  
28 to assess pre- and post-intervention outcomes.  
29  
30

31 The study was preregistered with the Open Science Framework on 12/17/2020 (Trial  
32 Registration Number: <https://osf.io/x693r>). All study participants gave their informed  
33 consent. The survey was approved by the Ethics Committee of Philipps University of  
34 Marburg (reference 2020-72k-2). Completing the survey took an average of 14 minutes.  
35 Measurements were collected online via the software platform Unipark (Enterprise  
36 Feedback Suite survey, version Fall 2020, Questback). Randomization was performed  
37 within the Unipark software. All procedures complied with the German Psychological  
38 Society's ethical guidelines.  
39  
40  
41  
42

### 43 **Participants**

44 Data collection was performed between December 2020 and April 2021. The sample size  
45 was determined using an a priori power analysis with G\*Power version 3.1.9.3[43].  
46 Following a similar preceding study[33], we based our calculations on a small effect  
47 between groups (expected  $f=.16$ ; power=.8; alpha error probability of .05), resulting in a  
48 necessary sample size of 230. Because we assumed a 10% dropout rate, we planned to  
49 survey 253 subjects. We recruited physicians via email distribution lists, physician  
50 networks, and emails to practices. Due to the different recruitment methods, we can only  
51 estimate the number of physicians contacted. We assume that we reached approximately  
52 10000 physicians, of whom 354 started the survey. The response rate is comparable to a  
53  
54  
55  
56  
57  
58  
59

1  
2  
3 similar study[33]. 257 participants completed the questionnaires at post-intervention,  
4 yielding a completion rate of 73% (Figure 1). Inclusion criteria were being employed as a  
5 physician and sufficient knowledge of the German language. Study participants were  
6 collected online through practices, hospitals and medical communities. In addition, we  
7 recruited a sample of 101 medical students via Facebook groups for medical students as  
8 well as email distribution lists of medical schools.  
9

10  
11  
12 *[Please insert figure 1 about here]*  
13

## 14 **Measures**

### 15 **Primary Outcome**

16  
17 Acceptance of the Unified Theory of Acceptance and Use of Technology model  
18 (UTAUT)[34] was our primary outcome. Acceptance according to the UTAUT model is  
19 conceived as the intention to use (new) technologies. The three acceptance items (table 1)  
20 were added together as a cumulative score, giving a range of 3 – 15. To make our data  
21 easier to interpret, we considered values as low (3 – 6), moderate (7 – 11) and high (12 –  
22 15). This classification is similar to other studies[32,33]. Cronbach's alpha was .93.  
23  
24  
25

### 26 **Secondary Outcomes**

27  
28 Performance expectancy of the UTAUT model was our secondary outcome. It was  
29 surveyed by means of 3 items (Table 1). Performance expectancy is conceptualized as the  
30 expectation that an intervention will be beneficial.  
31

32 An additional secondary outcome was the credibility of health apps, which we assessed via  
33 the credibility/expectancy questionnaire (CEQ)[44]. The credibility scale (e.g., “*How*  
34 *logical does the medical use of health apps for chronic pain seem to you?*”), includes 3  
35 items and asks about treatment credibility on a 9-point response scale (ranging from 1=not  
36 at all useful to 9=very useful). Cronbach's alpha for the credibility scale was .91.  
37

38 Primary and secondary outcomes were measured both before and after the intervention.  
39 With our cohort of medical students, only the primary and secondary outcomes were  
40 assessed, but not the predictors of acceptance.  
41  
42  
43

### 44 **Predictors of acceptance**

45 Predictors of acceptance were examined. For this purpose, we used the baseline variable  
46 of acceptance as dependent variable and multiple predictors as independent variables (see  
47 Statistical Analysis).  
48

49 Socio-demographic variables included age, gender, daily smartphone time and smartphone  
50 use in a professional context. All of the following items had to be slightly adapted for the  
51 purpose of this study.  
52

53 We assessed the four main constructs of UTAUT model[34]. The UTAUT model is an  
54 established model which states that the four constructs performance expectancy  
55  
56  
57  
58  
59

(Cronbach's alpha of .94); effort expectancy (Cronbach's alpha of .84); facilitating conditions (Spearman's correlation of .17); and social influence (Spearman's correlation of .79) have an effect on the acceptance and intention to use (new) technologies. The scales consist of statements (table 1) that can be agreed to on a 5-point response scale (answers ranging from 1=totally disagree to 5=totally agree). Higher values indicate a higher level of the construct. Items were adapted from different studies[39,45,46].

From the Attitudes toward Psychological Online Interventions questionnaire (APOI)[47], we used the skepticism and perception of risks scale, which contains 4 statements (e.g., *"It is difficult for patients to effectively integrate health apps into their daily lives."*) that can be agreed on a 5-point scale (ranging from 1=totally agree to 5=totally disagree). We excluded 1 item because its content did not fit the survey (*"By using a POI [Psychological Online Interventions], I do not receive professional support."*). Cronbach's alpha for this scale was .57.

Openness (e.g., *"I would use new treatments to help my patients."*) and intuitive appeal (e.g., *"If you learned about a new health app, how likely would you be to use it if it appealed to you intuitively?"*) were assessed with the Evidence-based Practice Attitude Scale-36 (EBPAS)[48]. The EBPAS measures difficulties and supportive factors in implementing evidence-based treatment approaches. Both scales consist of 4 statements or questions that can be agreed to on a 5-point response scale (ranging from 0=not at all to 4=to a very great extent). Cronbach's alpha of .84 (openness) and .87 (intuitive appeal). Before starting the survey, we gave participants a brief definition of health apps and instructed them that all questions are related to health apps for chronic pain patients.

**Table 1** UTAUT Items.

| UTAUT Scale            | Items                                                                                                                                                                                                                                                                     |
|------------------------|---------------------------------------------------------------------------------------------------------------------------------------------------------------------------------------------------------------------------------------------------------------------------|
| Acceptance             | <ol style="list-style-type: none"> <li>1. I can basically imagine prescribing a health app.</li> <li>2. I would prescribe health apps regularly.</li> <li>3. I would recommend health apps to colleagues.</li> </ol>                                                      |
| Performance Expectancy | <ol style="list-style-type: none"> <li>1. Using health apps would improve the effectiveness of my work.</li> <li>2. Using health apps would help me in my work and increase my productivity.</li> <li>3. Overall, health apps would help me treat my patients.</li> </ol> |
| Effort Expectancy      | <ol style="list-style-type: none"> <li>1. Using health apps would be easy.</li> <li>2. Using health apps would be easy for me.</li> <li>3. The use of health apps would be clear and understandable to me.</li> </ol>                                                     |
| Social Influence       | <ol style="list-style-type: none"> <li>1. Colleagues would advise me to use health apps.</li> </ol>                                                                                                                                                                       |

|                         |                                                                                                                                 |
|-------------------------|---------------------------------------------------------------------------------------------------------------------------------|
|                         | 2. My supervisors and/or experienced colleagues would recommend that I use health apps.                                         |
| Facilitating Conditions | 1. I would get support for technical problems with health apps.<br>2. I have the necessary technical skills to use health apps. |

*Notes.* Items are adapted from[39,45,46].

### **Intervention**

The control group (CG) watched a video (3:10 minutes) providing general information about chronic pain (e.g., prevalence and costs for the health care system and psychosocial consequences for people suffering from chronic pain). The experimental group (EG) watched a video (3:23 minutes) that discussed the content of health apps (e.g., how they can be used and the results of recent studies). We kept the information of both videos in simple language. In terms of content, the videos only gave a general overview of the topic without going into too much detail. Both videos were matched in terms of visuals (Figure 2). Skipping the video was not possible due to the survey software. We produced the video with the commercial software Powtoon (2012–2021 Powtoon Limited). A professional narrator recorded the audio track. An English translation of the spoken text is in the supplementary material.

*[Please insert figure 2 about here]*

### **Statistical Analysis**

We used the 26th version of IBM SPSS Statistics software for statistical analyses. There were no missing data due to the software (participants had to answer all questions to get to the next page). For all analyses, we used a type-1 error level of 5%.

Both Mahalanobis distance and Cook's distance were used to detect multivariate outliers[49]. According to the suggestion of Pituch and Stevens (2016), univariate outliers were calculated using standardized values[49]. We checked data for plausibility before exclusion. In addition, we checked subjects' comments at the end of the survey for possible bias.

To detect any differences between baseline values, we conducted a multivariate analysis of variance (MANOVA) for age; APOI; EBPAS; CEQ; and the UTAUT variables. We assessed gender differences using a chi-square test.

The video's influence on our primary and secondary outcomes was assessed via a 2 (condition) x 2 (time) repeated measures analysis of variance (ANOVA). Partial eta squared was used as the effect size measure, as suggested by Richardson (2011). Effect sizes were classified according to Richardson[50] based on Cohen[51]. To reduce inflation of the alpha error, we applied Bonferroni correction to secondary outcomes[52].

The variables influencing health apps' acceptance were calculated using linear regression, in which we added predictor groups blockwise: first, demographic variables (age; gender; daily smartphone time; smartphone use in a working context). The APOI, EBPAS, and CEQ scales were then added. Last, the four UTAUT predictors were added to the model. Acceptance from the pre-measurement was the dependent variable[32]. Because of the large number of predictors and resulting overestimation of  $R^2$ , we referred to an adjusted  $R^2$  as the outcome[53].

### Patient and public involvement

No patient involved.

## RESULTS

### Sample Characteristics

After inspecting the data, there was one exclusion because the subject stated that he had filled in the questionnaires arbitrarily. 8 subjects were excluded because they had stated "psychological psychotherapist" as their specialist direction, which in Germany indicates that they were not physicians but psychologists. This reduced our sample to 248 (38.71% female) ( $n_{EG}=124$ ;  $n_{CG}=124$ ). The average age was 49.56 years ( $SD=11.51$ ). There were no baseline differences between conditions. The most common fields of specialization were general practitioners (89); surgeons (39); anesthesiologists (29); neurologists and psychiatrists (23). Acceptance levels at baseline across both conditions were moderate ( $M=9.51$ ,  $SD=3.53$ ) with 21.4% in the low range, 47.1% in the moderate range, and 31.5% in the high range. See table 2 for a complete list of specialty directions, additional demographic variables as well as pre-values of the baseline measures.

**Table 2** Demographic characteristics.

| Variables                          | Experimental Group | Control Group |
|------------------------------------|--------------------|---------------|
| Age                                | 49.65 ± 11.57      | 49.47 ± 11.49 |
| Number (% female)                  | 124 (35.50)        | 124 (41.90)   |
| Professional environment (%)       |                    |               |
| Outpatient                         | 89 (71.8)          | 77 (62.1)     |
| Inpatient                          | 30 (24.2)          | 33 (26.6)     |
| Other                              | 5 (4.0)            | 14 (11.3)     |
| Medical Specialty (%) <sup>a</sup> |                    |               |
| General medicine                   | 49 (39.5)          | 40 (32.3)     |
| Surgery                            | 17 (13.7)          | 22 (17.7)     |
| Neurology                          | 17 (13.7)          | 6 (4.8)       |
| Anesthesiology                     | 11 (8.9)           | 18 (14.5)     |
| Orthopedics                        | 6 (4.8)            | 8 (6.5)       |

|                                       |              |              |
|---------------------------------------|--------------|--------------|
| Pediatrics                            | 5 (4)        | 8 (6.5)      |
| Other                                 | 19 (15.4)    | 22 (17.7)    |
| <hr/>                                 |              |              |
| CEQ                                   |              |              |
| Credibility                           | 5.28 ± 1.78  | 5.14 ± 1.96  |
| <hr/>                                 |              |              |
| APOI                                  |              |              |
| Scepticism and Perception<br>of Risks | 2.66 ± 0.74  | 2.68 ± 0.81  |
| <hr/>                                 |              |              |
| EBPAS                                 |              |              |
| Openness                              | 3.65 ± 0.87  | 3.66 ± 0.93  |
| Intuitive Appeal                      | 3.64 ± 0.88  | 3.57 ± 0.93  |
| <hr/>                                 |              |              |
| UTAUT                                 |              |              |
| Acceptance                            | 9.73 ± 3.33  | 9.30 ± 3.72  |
| Performance Expectancy                | 8.60 ± 3.00  | 8.30 ± 3.10  |
| Effort Expectancy                     | 11.03 ± 2.47 | 10.73 ± 2.42 |
| Social Influence                      | 5.80 ± 2.10  | 5.40 ± 1.95  |
| Facilitating Conditions               | 7.60 ± 1.71  | 7.48 ± 1.95  |

*Notes.* Values represent averages ( $\pm$  standard deviation), frequency or percentages; CEQ=credibility/expectancy questionnaire (range: 1-9); APOI=Attitudes toward Psychological Online Interventions questionnaire (range:1-5); EBPAS=Evidence-based Practice Attitude Scale-36 (range: 0-4); UTAUT=Unified Theory of Acceptance and Use of Technology (Acceptance, Performance Expectancy, Effort Expectancy range: 3-15, Social Influence and Facilitating Conditions range 2-10); <sup>a</sup>Only those medical specialties are listed that were represented by more than 5% in one of the two groups.

### Primary Outcome

Our subjects' acceptance was increased by means of the video (significant main effect of time ( $F(1, 246)=15.28, p<.001, \eta^2_p=.06$ )). Further subjects of the EG showed higher increases than those of the CG (significant time x condition interaction ( $F(1, 246)=15.28, p=.01, \eta^2_p=.02$ )). After the intervention, the EG ( $M=10.51, SD=3.28$ ) had higher post-acceptance scores than the CG ( $M=9.48, SD=3.57$ ) ( $t(246)=-2.37, p=.01$ ). Group comparison of post-assessment data revealed a small effect (Cohen's  $d=.30$ ). Figure 3 shows a comparison between the medical student sample and the physicians.

*[please insert figure 3 about here]*

### Secondary Outcomes

Performance expectancy could also be increased by the video (main effect of time ( $F(1, 246)=66.85, p<.001, \eta^2_p=.21$ )). Again, the increase was higher in the EG than in the CG (significant time x condition interaction ( $F(1, 246)=6.10, p=.01, \eta^2_p=.02$ )). The EG ( $M=9.94, SD=3.16$ ) had higher post-performance expectancy scores than the CG ( $M=9.02,$



1  
2  
3  $SD=3.34$ ) ( $t(246)=-2.23, p=.01$ ). Again, group comparison of the post-assessment data  
4 revealed a small effect (Cohen's  $d=.28$ ).  
5

6 We found the same pattern of results for credibility. It was increased by the video  
7 (significant effect of time ( $F(1, 246)=64.47, p<.001, \eta^2_p=.21$ ), with a higher increase in the  
8 EG (significant time x condition interaction ( $F(1, 246)=25.61, p<.001, \eta^2_p=.09$ )). Post  
9 values of the EG ( $M=6.07, SD=1.87$ ) were higher than those of the CG ( $M=5.31, SD=2.14$ )  
10 ( $t(246)=-2.95, p=.002$ ). Post-assessment group comparison revealed a small to moderate  
11 effect for credibility (Cohen's  $d=.38$ ). Figure 4 shows a comparison between the medical  
12 student sample and the physicians in terms of credibility.  
13  
14

15  
16 *[Please insert figure 4 about here]*  
17  
18

19 The medical students' pattern of results was identical to those illustrated above (see  
20 supplementary material for a detailed presentation of results and demographic variables).  
21 The time x condition interaction effect for acceptance had an effect size of  $\eta^2_p=.13$  (Figure  
22 2); for performance expectancy an effect size of  $\eta^2_p=.09$ ; and for credibility an effect size  
23 of  $\eta^2_p=.21$  (Figure 3).  
24  
25

### 26 27 **Predictors of acceptance**

28 Linear regression with the predictors from the first block was significant ( $R^2_{adj}=.14, F(4,$   
29  $242)=11.01, p<.001$ ). Age ( $\beta=-.23, p=.001$ ) and smartphone use in a professional context  
30 ( $\beta=.20, p=.002$ ) were related to acceptance.  
31

32 The model improved when we added the second block with APOI, EBPAS as well as CEQ  
33 scales ( $R^2_{adj}=.70, F(8, 238)=72.35, p<.001$ ). Credibility ( $\beta=.51, p<.001$ ) was the strongest  
34 predictor followed by skepticism ( $\beta=-.24, p<.001$ ) and intuitive appeal ( $\beta=.13, p=.01$ ).  
35 None of the predictors from the first block were significant.  
36

37 The model improved marginally after adding the UTAUT variables ( $R^2_{adj}=.73, F(12,$   
38  $234)=56.24, p<.001$ ). Again, credibility was the best predictor ( $\beta=.34, p<.001$ ), followed  
39 by performance expectancy ( $\beta=.30, p<.001$ ), skepticism ( $\beta=-.18, p<.001$ ) and intuitive  
40 appeal ( $\beta=.11, p=.03$ ). None of the other predictors were significant. A table with all  
41 predictors is provided in the supplementary material.  
42  
43  
44

### 45 46 **DISCUSSION**

47 The current study is the first to explicitly investigate physicians' acceptance of health apps  
48 focusing on chronic pain. Our results complement preceding studies by adding the  
49 physicians' perspective within an outpatient setting. The main aims of this study were to  
50 survey physicians' current acceptance of health apps for patients with chronic pain and to  
51 increase their acceptance. In general, physicians' and medical students' acceptance for  
52 health apps was moderate, which indicates a higher openness than previous studies[32].  
53 The experimental intervention successfully increased acceptance, performance expectancy  
54  
55  
56  
57  
58  
59  
60

1  
2  
3 and credibility of health apps among physicians and medical students. Our additional study  
4 aim was to identify variables that influence acceptance. Credibility and performance  
5 expectancy were the strongest predictors of acceptance, followed by skepticism and  
6 intuitive appeal.  
7  
8

9  
10 We found that our physicians' moderate acceptance of health apps was higher than that  
11 reported in previous studies: A survey conducted between 2015 and 2016 among various  
12 health care professionals observed rather low acceptance rates for electronic health  
13 interventions[32]. According to a recent study, psychotherapists exhibited mixed  
14 acceptance of blended care (a combination of internet and mobile based interventions and  
15 face-to-face therapy)[33]. However, the aforementioned study was conducted several years  
16 ago and perceptions of eHealth may have changed in the meantime. In particular, the  
17 COVID-19 pandemic may have influenced opinions about electronic health  
18 interventions[54]. Also, unlike the studies mentioned above, we specifically asked about  
19 health apps in our survey.  
20  
21  
22  
23

24 Our results indicate that brief, visually appealing educational videos may be an effective  
25 acceptance-facilitating intervention for physicians. Results from acceptance-enhancing  
26 interventions in other studies were inconclusive. Some researchers demonstrated positive  
27 effects[33], while others identified no effects[41,42]. Most researchers employed video  
28 interventions to increase acceptance toward eHealth interventions in general (e.g. online  
29 interventions) but not by focusing on apps in particular. Another potential explanation of  
30 our positive findings is the specific focus on chronic pain, as the perceived usefulness of  
31 e- and mHealth interventions could be disorder-specific.  
32  
33  
34  
35

36 However, the higher effect sizes of the student sample lead us to cautiously conclude that  
37 the intervention may be more effective with students. Although young age does not  
38 automatically lead to higher digital health competencies[55], young professionals appear  
39 to be more receptive to interventions that promote the acceptance of health apps. This could  
40 be due to a generally higher familiarity of younger people in using smartphones and their  
41 preference for this medium for obtaining health information[56]. Since high acceptance  
42 does not automatically lead to action[57], long-term studies examining the actual use of  
43 health apps among (prospective) physicians would be worthwhile.  
44  
45  
46  
47

48 The strong association we detected between performance expectancy and acceptance is in  
49 line with other research findings. Across studies, performance expectancy has consistently  
50 shown to be one of the most important predictors of acceptance of new technologies in the  
51 healthcare sector[32,37]. This strong association between performance expectancy and  
52 acceptance suggests that physicians' acceptance can be increased by highlighting the  
53 benefits of health apps for their patients and themselves. This is also supported by a study  
54  
55  
56  
57  
58  
59



1  
2  
3 which found that physicians are more likely to use mobile devices with drug reference  
4 software if they believe it will help their patients[58]. In contrast to Hennemann and  
5 colleagues[32], we found no impact of social influence on acceptance, nor did we find any  
6 influence of facilitating conditions as Liu and colleagues did[37]. Note that the subjects in  
7 those two studies were surveyed in inpatient settings. We mainly surveyed physicians in  
8 an outpatient setting. Accordingly, our physicians were probably relying less on their  
9 employer's facilitation because they are often self-employed. The same might apply to  
10 social support: Medical practices employ much less staff than hospitals, a fact that may  
11 have contributed to this construct being less significant in this survey. Additionally, it is  
12 worth mentioning that the two studies above did not specifically survey acceptance towards  
13 health apps and that they were conducted a few years ago. The relevance of certain  
14 constructs like facilitating conditions may have lessened since then.  
15  
16  
17  
18  
19

20 The association we found between credibility and acceptance also concurs with previous  
21 research findings. A study with college students concluded that credibility influences the  
22 perceptions of health apps positively[59]. The credibility of new technologies in the  
23 healthcare field is important[60] as it increases the likelihood that the technology will be  
24 used in the short and long term[61,62]. Accordingly, the low prescription rates (or the  
25 paucity of recommendations) of health apps by physicians could be partly attributable to  
26 their lack of credibility. One potential reason for this is the low quality of many health apps  
27 on the market[63]. Important to the credibility of information about new electronic health  
28 measures is the source of the information. Websites controlled by editors are perceived to  
29 be more credible, as is information from independent medical experts[64]. Because the  
30 source of the material appears to be more important than its design[65], independent  
31 research institutes can play an important role in disseminating evidence-based information  
32 about electronic health care interventions. By including highly visible videos on their  
33 websites, they could increase both the acceptance and awareness of health apps. Our results  
34 indicate that such an approach holds particular promise for medical students, highlighting  
35 the call for establishing eHealth curricula in education[60,66].  
36  
37  
38  
39  
40  
41  
42

43 Technological influences will continue to make strong inroads into medicine[67], which  
44 requires that health care professionals are able to adapt new technologies flexibly.  
45 Especially considering the rapid technological progress in this area, the evidence from  
46 earlier studies and from ours provide valuable information about the importance of  
47 communicating with physicians, psychotherapists, and other professional groups in the  
48 health care sector about eHealth in general and health apps in particular. Video  
49 interventions can be an effective and cost-saving method of communicating the potential,  
50 opportunities, and limitations of these new technologies. They reach the target group at a  
51 low threshold, for example, by being included on informational websites, newsletters or at  
52  
53  
54  
55  
56  
57  
58  
59  
60

1  
2  
3 training courses. This informational material should emphasize both performance  
4 expectancy and the credibility of the intervention being addressed.  
5  
6

7 In addition to increasing acceptance of health apps, it is also important to provide  
8 physicians with specific recommendations on which apps are best to use for which patients.  
9 Due to the volume of the still growing market, it is hardly possible for individuals to get a  
10 comprehensive overview of the range of health apps available. It therefore seems sensible  
11 to establish guidelines for physicians on which apps can be helpful for which problems -  
12 just as there are guidelines for medications for diseases. To achieve this, a recent study  
13 suggests specific recommendations from medical associations or scientific societies, as  
14 well as special training in this area[68]. This could help physicians integrate health apps  
15 into their workflows[69].  
16  
17  
18

### 19 20 **Limitations**

21 Our study has some limitations. First, due to our broad definition of pain apps, participants  
22 may have assumed different usage scenarios for health apps. This could have influenced  
23 their acceptance. Accordingly, future studies could investigate attitudes toward specific  
24 apps, e.g. psychological intervention apps. There may have been a selection bias due to the  
25 data collection method. Thus, physicians who were already open and interested in mHealth  
26 may have participated, which would restrict the generalizability of our results.  
27 Furthermore, our results relied solely on self-reporting. Most of our items were adaptations  
28 of already tested items or scales on questionnaires. This approach was necessary due to the  
29 lack of appropriate health app-specific questionnaires, but it remains a limitation. In  
30 addition, the scale facilitating conditions had low correlation measures, accordingly results  
31 of this scale should be interpreted with caution. Because of the survey's brevity, we could  
32 not collect many other potentially relevant constructs like technologization threat[47] or  
33 previous experience with health apps. As acceptance due to self-regulatory deficits[70]  
34 does not guarantee that intention becomes an action in the future[57], longitudinal surveys  
35 to examine whether video interventions increase the actual recommendations or  
36 prescriptions of the respective technologies should be one of the next steps in research.  
37  
38  
39  
40  
41  
42  
43

### 44 **Strengths**

45 To our knowledge, this is the first study that investigated and increased physicians'  
46 acceptance of health apps for managing chronic pain. This professional group is of  
47 particular interest due to the gatekeeper role they play in the healthcare system.  
48 Furthermore, we based the UTAUT questionnaires on predecessor studies, to increase  
49 comparability. In addition, we engaged a strong control group whose intervention was  
50 timed, visually, and audibly matched to the intervention video. Despite the brevity of the  
51 survey and our strong control group, we identified a superior effect of the intervention  
52  
53  
54  
55  
56  
57  
58  
59  
60

1  
2  
3 video. The video intervention was very short and can be integrated at a low-threshold  
4 within different platforms.  
5

### 6 7 **Conclusion**

8 Our results show that physicians are open to using health apps for chronic pain patients as  
9 they demonstrated moderate to high acceptance rates. Our study also shows that  
10 performance expectancy and credibility had the strongest influence on acceptance. As low-  
11 threshold entities, brief video interventions are useful tools that can strengthen these  
12 constructs and reach a high number of health professionals. They can thus be helpful in  
13 overcoming certain barriers to implementing mobile health interventions in clinical  
14 practice. Future studies should examine the long-term effect of acceptance facilitating  
15 interventions and their impact on behavioral measures.  
16  
17  
18

### 19 20 **Acknowledgements**

21 We would like to thank Nora Jander for her excellent voice-over on the video and Benno  
22 Glöckler and Kari Fuhrmann for their support in recruiting the physicians.  
23  
24

### 25 26 **Disclosure of Interest**

27 None declared.  
28

### 29 30 **Funding**

31 This research received no specific grant from any funding agency in the public, commercial  
32 or not-for-profit sectors.  
33  
34

### 35 36 **Author Contributions**

37 HJH, JAG, WR, JR: Conception and design of the study; HJH: data collection, analysis,  
38 and interpretation, manuscript preparation; JAG, WR, JR: supervision, manuscript editing  
39 and reviewing; JR: project administration. All authors approved the final manuscript.  
40

### 41 42 **Data sharing statement**

43 Data can be shared upon reasonable request. A request can be made to the corresponding  
44 author.  
45

### 46 47 **Legends of the figures**

48 **Figure 1** Flowchart.  
49

50  
51 **Figure 2** Screenshots of the video interventions. Left: Video of the EG describing  
52 possible applications of pain apps; Right: Video of the CG describing psychosocial  
53 consequences of chronic pain.  
54  
55  
56  
57  
58  
59

**Figure 3** Change in acceptance. EG=Experimental Group; CG=Control Group; pre=measurement before the video; post=measurement after the video; Error bars indicate standard errors; \* $p < .05$ ; \*\* $p < .005$ .

**Figure 4** Change in credibility. EG=Experimental Group; CG=Control Group; pre=measurement before the video; post=measurement after the video; Error bars indicate standard errors; \*\* $p < .001$ .

## References

1. Vos T, Allen C, Arora M, Barber RM, Bhutta ZA, Brown A, et al. Global, regional, and national incidence, prevalence, and years lived with disability for 310 diseases and injuries, 1990–2015: a systematic analysis for the Global Burden of Disease Study 2015. *Lancet* 2016;388:1545–602. [https://doi.org/10.1016/S0140-6736\(16\)31678-6](https://doi.org/10.1016/S0140-6736(16)31678-6).
2. Graham JE, Streitel KL. Sleep quality and acute pain severity among young adults with and without chronic pain: the role of biobehavioral factors. *J Behav Med* 2010;33:335–45. <https://doi.org/10.1007/s10865-010-9263-y>.
3. Ratcliffe GE, Enns MW, Belik S-L, Sareen J. Chronic Pain Conditions and Suicidal Ideation and Suicide Attempts: An Epidemiologic Perspective. *Clin J Pain* 2008;24:204–10. <https://doi.org/10.1097/AJP.0b013e31815ca2a3>.
4. Ryan S, Hill J, Thwaites C, Dawes P. Assessing the effect of fibromyalgia on patients' sexual activity. *Nurs Stand* 2008;23:35–41. <https://doi.org/10.7748/ns2008.09.23.2.35.c6669>.
5. Veehof MM, Trompetter HR, Bohlmeijer ET, Schreurs KMG. Acceptance- and mindfulness-based interventions for the treatment of chronic pain: a meta-analytic review. *Cogn Behav Ther* 2016;45:5–31. <https://doi.org/10.1080/16506073.2015.1098724>.
6. Glombiewski JA, Holzappel S, Riecke J, Vlaeyen JWS, de Jong J, Lemmer G, et al. Exposure and CBT for chronic back pain: An RCT on differential efficacy and optimal length of treatment. *J Consult Clin Psychol* 2018;86:533–45. <https://doi.org/10.1037/ccp0000298>.
7. Williams AC de C, Fisher E, Hearn L, Eccleston C. Psychological therapies for the management of chronic pain (excluding headache) in adults. *Cochrane Database Syst Rev* 2020;2021. <https://doi.org/10.1002/14651858.CD007407.pub4>.
8. Morley S. Relapse prevention: Still neglected after all these years. *Pain* 2008;134:239–40. <https://doi.org/10.1016/j.pain.2007.12.004>.
9. Gaskin DJ, Richard P. The Economic Costs of Pain in the United States. *J Pain* 2012;13:715–24. <https://doi.org/10.1016/j.jpain.2012.03.009>.
10. Leadley RM, Armstrong N, Lee YC, Allen A, Kleijnen J. Chronic Diseases in the European Union: The Prevalence and Health Cost Implications of Chronic Pain. *J Pain Palliat Care Pharmacother* 2012;26:310–25. <https://doi.org/10.3109/15360288.2012.736933>.
11. Landmark T, Romundstad P, Dale O, Borchgrevink PC, Vatten L, Kaasa S.

- 1  
2  
3  
4  
5  
6  
7  
8  
9  
10  
11  
12  
13  
14  
15  
16  
17  
18  
19  
20  
21  
22  
23  
24  
25  
26  
27  
28  
29  
30  
31  
32  
33  
34  
35  
36  
37  
38  
39  
40  
41  
42  
43  
44  
45  
46  
47  
48  
49  
50  
51  
52  
53  
54  
55  
56  
57  
58  
59  
60
- Chronic pain: One year prevalence and associated characteristics (the HUNT pain study). *Scand J Pain* 2013;4:182–7. <https://doi.org/10.1016/j.sjpain.2013.07.022>.
12. Patel S, Greasley K, Watson PJ. Barriers to rehabilitation and return to work for unemployed chronic pain patients: A qualitative study. *Eur J Pain* 2007;11:831–40. <https://doi.org/10.1016/j.ejpain.2006.12.011>.
13. Turner JA. Pain and disability. Clinical, behavioral, and public policy perspectives (Institute of Medicine Committee on pain, disability, and chronic illness behavior). *Pain* 1988;32:385–6. [https://doi.org/10.1016/0304-3959\(88\)90054-1](https://doi.org/10.1016/0304-3959(88)90054-1).
14. Austrian JS, Kerns RD, Carrington Reid M. Perceived Barriers to Trying Self-Management Approaches for Chronic Pain in Older Persons. *J Am Geriatr Soc* 2005;53:856–61. <https://doi.org/10.1111/j.1532-5415.2005.53268.x>.
15. Becker WC, Dorflinger L, Edmond SN, Islam L, Heapy AA, Fraenkel L. Barriers and facilitators to use of non-pharmacological treatments in chronic pain. *BMC Fam Pract* 2017;18:41. <https://doi.org/10.1186/s12875-017-0608-2>.
16. International Pain Summit of the In. Declaration of Montréal: Declaration That Access to Pain Management Is a Fundamental Human Right. *J Pain Palliat Care Pharmacother* 2011;25:29–31. <https://doi.org/10.3109/15360288.2010.547560>.
17. Holmes EA, Ghaderi A, Harmer CJ, Ramchandani PG, Cuijpers P, Morrison AP, et al. The Lancet Psychiatry Commission on psychological treatments research in tomorrow's science. *The Lancet Psychiatry* 2018;5:237–86. [https://doi.org/10.1016/S2215-0366\(17\)30513-8](https://doi.org/10.1016/S2215-0366(17)30513-8).
18. Luxton DD, McCann RA, Bush NE, Mishkind MC, Reger GM. mHealth for mental health: Integrating smartphone technology in behavioral healthcare. *Prof Psychol Res Pract* 2011;42:505–12. <https://doi.org/10.1037/a0024485>.
19. Demiris G, Afrin LB, Speedie S, Courtney KL, Sondhi M, Vimarlund V, et al. Patient-centered Applications: Use of Information Technology to Promote Disease Management and Wellness. A White Paper by the AMIA Knowledge in Motion Working Group. *J Am Med Informatics Assoc* 2008;15:8–13. <https://doi.org/10.1197/jamia.M2492>.
20. Alexander J, Joshi G. Smartphone applications for chronic pain management: a critical appraisal. *J Pain Res* 2016;Volume 9:731–4. <https://doi.org/10.2147/JPR.S119966>.
21. Chhabra HS, Sharma S, Verma S. Smartphone app in self-management of chronic low back pain: a randomized controlled trial. *Eur Spine J* 2018;27:2862–74. <https://doi.org/10.1007/s00586-018-5788-5>.
22. Toelle TR, Utpadel-Fischler DA, Haas K-K, Priebe JA. App-based multidisciplinary back pain treatment versus combined physiotherapy plus online education: a randomized controlled trial. *Npj Digit Med* 2019;2:34. <https://doi.org/10.1038/s41746-019-0109-x>.
23. Pfeifer A-C, Uddin R, Schröder-Pfeifer P, Holl F, Swoboda W, Schiltenwolf M. Mobile Application-Based Interventions for Chronic Pain Patients: A Systematic Review and Meta-Analysis of Effectiveness. *J Clin Med* 2020;9:3557. <https://doi.org/10.3390/jcm9113557>.
24. Moman RN, Dvorkin J, Pollard EM, Wanderman R, Murad MH, Warner DO, et al. A Systematic Review and Meta-analysis of Unguided Electronic and Mobile Health Technologies for Chronic Pain—Is It Time to Start Prescribing Electronic



- 1  
2  
3 Health Applications? *Pain Med* 2019;20:2238–55.  
4 <https://doi.org/10.1093/pm/pnz164>.
- 5 25. Terhorst Y, Messner E-M, Schultchen D, Paganini S, Portenhauser A, Eder A-S, et  
6 al. Systematic evaluation of content and quality of English and German pain apps  
7 in European app stores. *Internet Interv* 2021;24:100376.  
8 <https://doi.org/10.1016/j.invent.2021.100376>.
- 9 26. Cowan KE, McKean AJ, Gentry MT, Hilty DM. Barriers to Use of Telepsychiatry:  
10 Clinicians as Gatekeepers. *Mayo Clin Proc* 2019;94:2510–23.  
11 <https://doi.org/10.1016/j.mayocp.2019.04.018>.
- 12 27. Kayyali R, Peletidi A, Ismail M, Hashim Z, Bandeira P, Bonnah J. Awareness and  
13 Use of mHealth Apps: A Study from England. *Pharmacy* 2017;5:33.  
14 <https://doi.org/10.3390/pharmacy5020033>.
- 15 28. Anastasiadou D, Folkvord F, Serrano-Troncoso E, Lupiañez-Villanueva F. Mobile  
16 Health Adoption in Mental Health: User Experience of a Mobile Health App for  
17 Patients With an Eating Disorder. *JMIR MHealth UHealth* 2019;7:e12920.  
18 <https://doi.org/10.2196/12920>.
- 19 29. Parker SJ, Jessel S, Richardson JE, Reid MC. Older adults are mobile  
20 too! Identifying the barriers and facilitators to older adults' use of mHealth for pain  
21 management. *BMC Geriatr* 2013;13:43. <https://doi.org/10.1186/1471-2318-13-43>.
- 22 30. Byambasuren O, Beller E, Glasziou P. Current Knowledge and Adoption of  
23 Mobile Health Apps Among Australian General Practitioners: Survey Study. *JMIR*  
24 *MHealth UHealth* 2019;7:e13199. <https://doi.org/10.2196/13199>.
- 25 31. Ross EL, Jamison RN, Nicholls L, Perry BaM, Nolen KD. Clinical Integration of a  
26 Smartphone App for Patients With Chronic Pain: Retrospective Analysis of  
27 Predictors of Benefits and Patient Engagement Between Clinic Visits. *J Med*  
28 *Internet Res* 2020;22:e16939. <https://doi.org/10.2196/16939>.
- 29 32. Hennemann S, Beutel ME, Zwerenz R. Ready for eHealth? Health Professionals'  
30 Acceptance and Adoption of eHealth Interventions in Inpatient Routine Care. *J*  
31 *Health Commun* 2017;22:274–84.  
32 <https://doi.org/10.1080/10810730.2017.1284286>.
- 33 33. Baumeister H, Terhorst Y, Grässle C, Freudenstein M, Nübling R, Ebert DD.  
34 Impact of an acceptance facilitating intervention on psychotherapists' acceptance  
35 of blended therapy. *PLoS One* 2020;15:e0236995.  
36 <https://doi.org/10.1371/journal.pone.0236995>.
- 37 34. Venkatesh, Morris, Davis, Davis. User Acceptance of Information Technology:  
38 Toward a Unified View. *MIS Q* 2003;27:425. <https://doi.org/10.2307/30036540>.
- 39 35. Gagnon M-P, Ngangue P, Payne-Gagnon J, Desmartis M. m-Health adoption by  
40 healthcare professionals: a systematic review. *J Am Med Informatics Assoc*  
41 2016;23:212–20. <https://doi.org/10.1093/jamia/ocv052>.
- 42 36. Lazuras L, Dokou A. Mental health professionals' acceptance of online  
43 counseling. *Technol Soc* 2016;44:10–4.  
44 <https://doi.org/10.1016/j.techsoc.2015.11.002>.
- 45 37. Liu L, Miguel Cruz A, Rios Rincon A, Buttar V, Ranson Q, Goertzen D. What  
46 factors determine therapists' acceptance of new technologies for rehabilitation – a  
47 study using the Unified Theory of Acceptance and Use of Technology (UTAUT).  
48 *Disabil Rehabil* 2015;37:447–55. <https://doi.org/10.3109/09638288.2014.923529>.
- 49  
50  
51  
52  
53  
54  
55  
56  
57  
58  
59  
60

- 1
  - 2
  - 3
  - 4
  - 5
  - 6
  - 7
  - 8
  - 9
  - 10
  - 11
  - 12
  - 13
  - 14
  - 15
  - 16
  - 17
  - 18
  - 19
  - 20
  - 21
  - 22
  - 23
  - 24
  - 25
  - 26
  - 27
  - 28
  - 29
  - 30
  - 31
  - 32
  - 33
  - 34
  - 35
  - 36
  - 37
  - 38
  - 39
  - 40
  - 41
  - 42
  - 43
  - 44
  - 45
  - 46
  - 47
  - 48
  - 49
  - 50
  - 51
  - 52
  - 53
  - 54
  - 55
  - 56
  - 57
  - 58
  - 59
  - 60
38. Sezgin E, Özkan-Yildirim S, Yildirim S. Investigation of physicians' awareness and use of mHealth apps: A mixed method study. *Heal Policy Technol* 2017;6:251–67. <https://doi.org/10.1016/j.hlpt.2017.07.007>.
39. Baumeister H, Seiffert H, Lin J, Nowoczin L, Lüking M, Ebert D. Impact of an Acceptance Facilitating Intervention on Patients' Acceptance of Internet-based Pain Interventions. *Clin J Pain* 2015;31:528–35. <https://doi.org/10.1097/AJP.000000000000118>.
40. Lin J, Faust B, Ebert DD, Krämer L, Baumeister H. A Web-Based Acceptance-Facilitating Intervention for Identifying Patients' Acceptance, Uptake, and Adherence of Internet- and Mobile-Based Pain Interventions: Randomized Controlled Trial. *J Med Internet Res* 2018;20:e244. <https://doi.org/10.2196/jmir.9925>.
41. Donovan CL, Poole C, Boyes N, Redgate J, March S. Australian mental health worker attitudes towards cCBT: What is the role of knowledge? Are there differences? Can we change them? *Internet Interv* 2015;2:372–81. <https://doi.org/10.1016/j.invent.2015.09.001>.
42. Schuster R, Pokorny R, Berger T, Topooco N, Laireiter A-R. The Advantages and Disadvantages of Online and Blended Therapy: Survey Study Amongst Licensed Psychotherapists in Austria. *J Med Internet Res* 2018;20:e11007. <https://doi.org/10.2196/11007>.
43. Faul F, Erdfelder E, Lang A-G, Buchner A. G\*Power 3: A flexible statistical power analysis program for the social, behavioral, and biomedical sciences. *Behav Res Methods* 2007;39:175–91. <https://doi.org/10.3758/BF03193146>.
44. Devilly GJ, Borkovec TD. Psychometric properties of the credibility/expectancy questionnaire. *J Behav Ther Exp Psychiatry* 2000;31:73–86. [https://doi.org/10.1016/S0005-7916\(00\)00012-4](https://doi.org/10.1016/S0005-7916(00)00012-4).
45. Baumeister H, Nowoczin L, Lin J, Seiffert H, Seufert J, Laubner K, et al. Impact of an acceptance facilitating intervention on diabetes patients' acceptance of Internet-based interventions for depression: A randomized controlled trial. *Diabetes Res Clin Pract* 2014;105:30–9. <https://doi.org/10.1016/j.diabres.2014.04.031>.
46. Ebert DD, Berking M, Cuijpers P, Lehr D, Pörtner M, Baumeister H. Increasing the acceptance of internet-based mental health interventions in primary care patients with depressive symptoms. A randomized controlled trial. *J Affect Disord* 2015;176:9–17. <https://doi.org/10.1016/j.jad.2015.01.056>.
47. Schröder J, Sautier L, Kriston L, Berger T, Meyer B, Späth C, et al. Development of a questionnaire measuring Attitudes towards Psychological Online Interventions-the APOI. *J Affect Disord* 2015;187:136–41. <https://doi.org/10.1016/j.jad.2015.08.044>.
48. Rye M, Torres EM, Friberg O, Skre I, Aarons GA. The Evidence-based Practice Attitude Scale-36 (EBPAS-36): A brief and pragmatic measure of attitudes to evidence-based practice validated in US and Norwegian samples. *Implement Sci* 2017;12:1–11. <https://doi.org/10.1186/s13012-017-0573-0>.
49. Pituch KA, Stevens JP. *Applied multivariate statistics for the social sciences: Analyses with SAS and IBM's SPSS*. 2016.
50. Richardson JTE. Eta squared and partial eta squared as measures of effect size in

- educational research. *Educ Res Rev* 2011;6:135–47.  
<https://doi.org/10.1016/j.edurev.2010.12.001>.
51. Cohen J. *Statistical power analysis for the behavioural sciences*. New York: Academic Press; 1969.
52. Armstrong RA. When to use the Bonferroni correction. *Ophthalmic Physiol Opt* 2014;34:502–8. <https://doi.org/10.1111/opo.12131>.
53. Miles J. R -Squared, Adjusted R -Squared. *Encycl. Stat. Behav. Sci.*, vol. 4, Chichester, UK: John Wiley & Sons, Ltd; 2005, p. 1655–7.  
<https://doi.org/10.1002/0470013192.bsa526>.
54. Wind TR, Rijkeboer M, Andersson G, Riper H. The COVID-19 pandemic: The ‘black swan’ for mental health care and a turning point for e-health. *Internet Interv* 2020;20:100317. <https://doi.org/10.1016/j.invent.2020.100317>.
55. Machleid F, Kaczmarczyk R, Johann D, Balčiūnas J, Atienza-Carbonell B, von Maltzahn F, et al. Perceptions of Digital Health Education Among European Medical Students: Mixed Methods Survey. *J Med Internet Res* 2020;22:e19827. <https://doi.org/10.2196/19827>.
56. Granger D, Vandelanotte C, Duncan MJ, Alley S, Schoeppe S, Short C, et al. Is preference for mHealth intervention delivery platform associated with delivery platform familiarity? *BMC Public Health* 2016;16:619. <https://doi.org/10.1186/s12889-016-3316-2>.
57. Sheeran P, Webb TL. The Intention-Behavior Gap. *Soc Personal Psychol Compass* 2016;10:503–18. <https://doi.org/10.1111/spc3.12265>.
58. Handler SM, Boyce RD, Ligons FM, Perera S, Nace DA, Hochheiser H. Use and Perceived Benefits of Mobile Devices by Physicians in Preventing Adverse Drug Events in the Nursing Home. *J Am Med Dir Assoc* 2013;14:906–10. <https://doi.org/10.1016/j.jamda.2013.08.014>.
59. Cho J, Lee HE, Quinlan M. Complementary Relationships Between Traditional Media and Health Apps Among American College Students. *J Am Coll Heal* 2015;63:248–57. <https://doi.org/10.1080/07448481.2015.1015025>.
60. van Gemert-Pinjen J, Wynchank S, Covvey H, Ossebaard H. Improving the credibility of electronic health technologies. *Bull World Health Organ* 2012;90:323–323. <https://doi.org/10.2471/BLT.11.099804>.
61. Shin D-H, Lee S, Hwang Y. How do credibility and utility play in the user experience of health informatics services? *Comput Human Behav* 2017;67:292–302. <https://doi.org/10.1016/j.chb.2016.11.007>.
62. Lin J, Wang B, Wang N, Lu Y. Understanding the evolution of consumer trust in mobile commerce: a longitudinal study. *Inf Technol Manag* 2014;15:37–49. <https://doi.org/10.1007/s10799-013-0172-y>.
63. Reynoldson C, Stones C, Allsop M, Gardner P, Bennett MI, Closs SJ, et al. Assessing the Quality and Usability of Smartphone Apps for Pain Self-Management. *Pain Med* 2014;15:898–909. <https://doi.org/10.1111/pme.12327>.
64. Hu Y, Shyam Sundar S. Effects of Online Health Sources on Credibility and Behavioral Intentions. *Communic Res* 2010;37:105–32. <https://doi.org/10.1177/0093650209351512>.
65. Chang Y-S, Zhang Y, Gwizdka J. The effects of information source and eHealth literacy on consumer health information credibility evaluation behavior. *Comput*



- 1  
2  
3 Human Behav 2021;115:106629. <https://doi.org/10.1016/j.chb.2020.106629>.
- 4 66. Gordon WJ, Landman A, Zhang H, Bates DW. Beyond validation: getting health  
5 apps into clinical practice. *Npj Digit Med* 2020;3:14.  
6 <https://doi.org/10.1038/s41746-019-0212-z>.
- 7 67. Seyhan AA, Carini C. Are innovation and new technologies in precision medicine  
8 paving a new era in patients centric care? *J Transl Med* 2019;17:114.  
9 <https://doi.org/10.1186/s12967-019-1864-9>.
- 10 68. Jacob C, Sanchez-Vazquez A, Ivory C. Social, Organizational, and Technological  
11 Factors Impacting Clinicians' Adoption of Mobile Health Tools: Systematic  
12 Literature Review. *JMIR MHealth UHealth* 2020;8:e15935.  
13 <https://doi.org/10.2196/15935>.
- 14 69. Dahlhausen F, Zinner M, Bieske L, Ehlers JP, Boehme P, Fehring L. Physicians'  
15 Attitudes Toward Prescribable mHealth Apps and Implications for Adoption in  
16 Germany: Mixed Methods Study. *JMIR MHealth UHealth* 2021;9:e33012.  
17 <https://doi.org/10.2196/33012>.
- 18 70. Gollwitzer PM, Sheeran P. Implementation Intentions and Goal Achievement: A  
19 Meta-analysis of Effects and Processes. *Adv. Exp. Soc. Psychol.*, vol. 38, 2006, p.  
20 69–119. [https://doi.org/10.1016/S0065-2601\(06\)38002-1](https://doi.org/10.1016/S0065-2601(06)38002-1).
- 21  
22  
23  
24  
25  
26  
27  
28  
29  
30  
31  
32  
33  
34  
35  
36  
37  
38  
39  
40  
41  
42  
43  
44  
45  
46  
47  
48  
49  
50  
51  
52  
53  
54  
55  
56  
57  
58  
59  
60

1  
2  
3  
4  
5  
6  
7  
8  
9  
10  
11  
12  
13  
14  
15  
16  
17  
18  
19  
20  
21  
22  
23  
24  
25  
26  
27  
28  
29  
30  
31

Participants (354)

Exclusion (Survey not completed) (97)

Randomization (257)

Experimental Group (127)

Control Group (130)

Analysis with post data (124)  
- Exclusion due to the profession specified (3)

Analysis with post data (124)  
- Exclusion due to the profession specified (5)  
Other exclusion (1)

1  
2  
3  
4  
5  
6  
7  
8  
9  
10

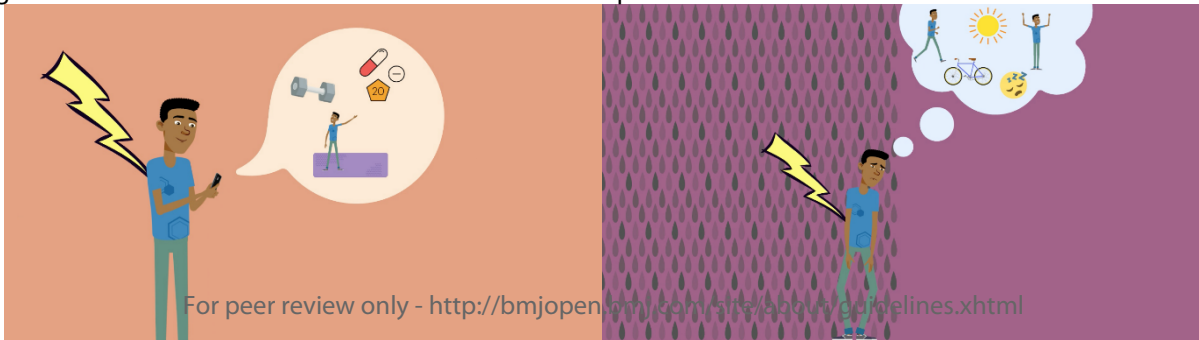

For peer review only - <http://bmjopen.bmj.com/site/about/guidelines.xhtml>

## Physicians

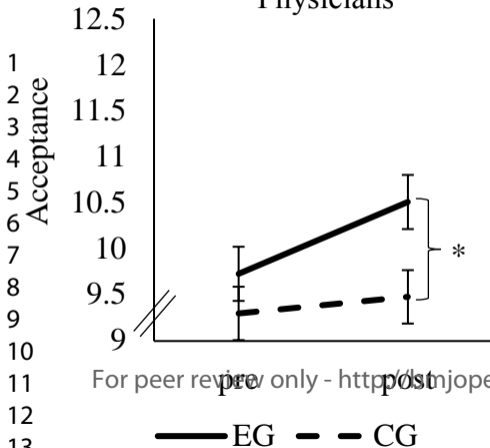

## Students

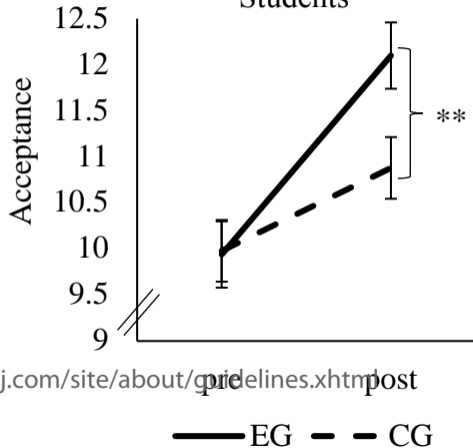

### Physicians

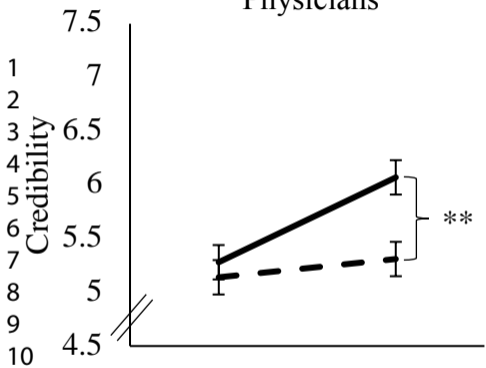

### Students

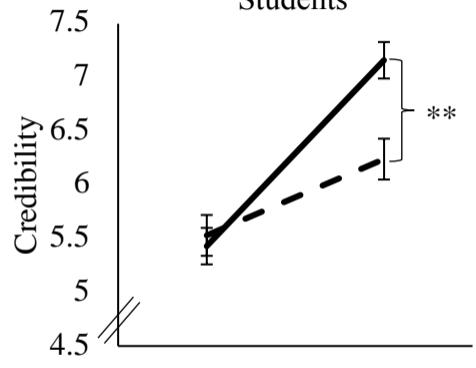

For peer review only - <http://bmjopen.bmj.com/site/about/guidelines.xhtml>

— EG    - - CG

— EG    - - CG

## SUPPLEMENTARY MATERIAL

### Transcripts and English translations of the video interventions

German transcript of the health app-video

#### Seite 0

Gesundheits-Apps für chronische Schmerzpatient\*innen

#### Seite 1

In diesem Video geht es um Gesundheits-Apps für chronische Schmerzpatient\*innen. Darum, was sie sind, welchen Nutzen Patient\*innen aus ihnen ziehen können und wie der aktuelle Wissenschaftsstand zu ihrer Wirksamkeit aussieht.

#### Seite 2

Ende des Jahres 2019 trat das „Digitale Versorgungs-Gesetz“ in Kraft. Es ermöglicht Ärztinnen und Ärzten ihren Patient\*innen zertifizierte Gesundheits-Apps auf Rezept zu verschreiben.

#### Seite 3

Das Einsatzgebiet von Gesundheits-Apps ist vielfältig.

Sie können etwa nach einem klinischen Aufenthalt zur Nachsorge oder in der ambulanten Versorgung als Therapiebegleitung eingesetzt werden.

Gerade bei chronischen Schmerzen erscheinen Gesundheits-Apps sinnvoll. Sie stehen Patient\*innen jederzeit bei der Bewältigung ihrer Beschwerden zur Verfügung und können beispielsweise bei einem Schmerzschub direkt zur Hand genommen werden.

#### Seite 4

Ziele solcher Apps sind vor allem der Aufbau und die Aufrechterhaltung von Bewältigungsstrategien für den Umgang mit Schmerzen.

Sie können Patient\*innen dabei unterstützen, hinsichtlich ihrer Gesundheitsziele am Ball zu bleiben und ihre mit ihrer Ärztin oder ihrem Arzt vereinbarten Vorsätze zu erreichen. Das kann mittels einer Erinnerungsfunktion, aufgestellten Bewegungsplänen oder ähnlichen geschehen.

Weiterhin können Schmerztagebücher geführt werden, die Patient\*in und Behandler\*in einen visuellen Überblick über den Schmerzverlauf geben.

Darüber hinaus helfen Gesundheits-Apps Patient\*innen dabei, körperliche Übungen durchzuführen – beispielsweise mit unterstützenden Videos.

Sie können auch einen Überblick über die aktuelle Medikation geben. Ebenfalls hilfreich sind vertiefende Hintergrundinformationen, geleitete Entspannungsverfahren oder eine Schritt für Schritt durchgeführte gedankliche Neubewertung der Schmerzsymptome.

#### Seite 5

Mittlerweile gibt es eine ganze Reihe von Studien, die sich mit der Wirksamkeit von Gesundheits-Apps befassen haben.

**Seite 6**

Bereits 2013 zeigten Parker und Kollegen, dass auch ältere, technisch weniger versierte, Patient\*innen an der Nutzung von Gesundheits-Apps zur Unterstützung ihrer Krankheitsbewältigung interessiert sind.

**Seite 7**

Eine Studie aus Norwegen zeigt, dass Patient\*innen, die zusätzlich zur ärztlichen Behandlung eine Smartphone-Intervention nutzten, ihre chronischen Schmerzen eher akzeptieren können und weniger negative Gedanken ihnen gegenüber haben.

**Seite 8**

Toelle und Kollegen zeigten 2019, dass die Behandlung mit einer Gesundheits-App zu einer geringeren Schmerzintensität führt.

**Seite 9**

Weitere Studien zeigen, dass Patient\*innen, die zusätzlich zu ihrer Behandlung Gesundheits-Apps nutzen, zufriedener mit ihrer Behandlung sind... ihren Alltag aktiver gestalten... und ein effektiveres Selbstmanagement haben.

**Seite 10**

Neben diesen Ergebnissen gibt es viele weitere Studien, die sich mit Gesundheits-Apps auseinandersetzen und unser Wissen zu diesem Thema erweitern.

**Seite 11**

Auch wenn es weiterer Forschung bedarf, um das Wirksamkeitspotential von Gesundheits-Apps abschließend einschätzen zu können, sind die bisherigen Studienergebnisse sehr vielversprechend.

Wichtig dabei ist, dass Apps in eine Behandlung eingebunden werden und diese nicht ersetzen sollen.

Ist das gegeben können Apps eine wertvolle Therapiebereicherung sein.

English translation

**Page 0**

Health apps for chronic pain patients

**Page 1**

This video is about health apps for chronic pain patients: what they are, how patients can benefit from them, and what the current state of science is regarding their effectiveness.

**Page 2**

At the end of 2019, the "Digital Care Act" came into force. It enables doctors to prescribe certified health apps to their patients.

**Page 3**

Health apps can be used in a variety of ways.

1  
2  
3 For example, they can be used after a clinical stay for follow-up care or in outpatient care as  
4 therapy support.  
5

6 In the case of chronic pain in particular, health apps seem to be useful. They are available to  
7 patients at any time to help them cope with their symptoms and can, for example, help  
8 immediately in the event of a pain attack.  
9

#### 10 **Page 4**

11 The main aim of such apps is to establish and maintain coping strategies for dealing with pain.  
12

13 They can help patients stay on track with their health goals and achieve the resolutions they  
14 have agreed on with their doctor. This can be done via a reminder function, established  
15 exercise plans, or similar.  
16

17 Furthermore, pain diaries can be used to give patients and doctors a visual overview of their  
18 patient's pain course.  
19

20 In addition, health apps help patients do physical exercises - for example, through supporting  
21 videos.  
22

23 They can also provide an overview of current medication. Other helpful features include in-  
24 depth background information, guided relaxation procedures, or a step-by-step mental re-  
25 evaluation of pain symptoms.  
26

#### 27 **Page 5**

28 Quite a few studies have investigated the effectiveness of health apps.  
29

#### 30 **Page 6**

31 As early as 2013, Parker and colleagues showed that older, less tech-savvy patients are  
32 interested in using health apps to assist with their disease management.  
33

#### 34 **Page 7**

35 A study from Norway showed that patients who used a smartphone intervention in addition to  
36 medical treatment were more likely to accept their chronic pain and have fewer negative  
37 thoughts about it.  
38

#### 39 **Page 8**

40 Toelle and colleagues showed in 2019 that treatment with a health app led to lower pain  
41 intensity.  
42

#### 43 **Page 9**

44 Other studies show that patients who use health apps in addition to their treatment are more  
45 satisfied with their treatment... are more active in their daily lives... and have more effective  
46 self-management.  
47

#### 48 **Page 10**

49 In addition to these findings, many other studies have addressed health apps and deepened our  
50 knowledge on this topic.  
51

#### 52 **Page 11**



1  
2  
3 Although more research is needed to conclusively assess the potential effectiveness of health  
4 apps, the study results to date are very promising.  
5

6 It is important to note that apps should be integrated within treatment and not replace it.  
7

8 If that is the case, apps can be a valuable supplement to therapy.  
9  
10  
11  
12  
13

14 German transcript of the control-video  
15

## 16 Seite 0

17 Chronische Schmerzen  
18

## 19 Seite 1

20 In diesem Video geht es um chronische Schmerzen: Was sie sind und welche Ursachen sie  
21 haben; wie stark ihre Verbreitung in der Bevölkerung ist und welche  
22 Behandlungsmöglichkeiten es gibt.  
23  
24

## 25 Seite 2

26 Von chronischen Schmerzen wird gesprochen, sobald man länger als 6 Monate anhaltende  
27 Schmerzen hat.  
28  
29

30 Chronische Schmerzen können in allen Körperregionen entstehen. Mit Abstand am häufigsten  
31 treten sie jedoch im Rücken auf. Aber auch chronische Kopf- oder Gelenkschmerzen sind keine  
32 Seltenheit.  
33  
34

## 35 Seite 3

36 In der Bevölkerung sind chronische Schmerzen weit verbreitet:  
37

38 Von 900 Patient\*innen in ambulanten Arztpraxen haben 327 chronische Schmerzen – das  
39 entspricht über 36% der Patient\*innen. Insgesamt leiden 12 bis 15 Millionen Menschen in  
40 Deutschland an anhaltenden oder wiederkehrenden Schmerzen. Häufig führen Schmerzen zu  
41 anhaltenden Einschränkungen ihres Arbeits- oder Privatlebens.  
42  
43

44 Gerade Rückenschmerzen stellen ein zentrales Problem dar.  
45

## 46 Seite 4

47 Rückenschmerzen im Allgemeinen und chronische Rückenschmerzen im Speziellen sind der  
48 häufigste Grund für Arbeitsausfälle. Über 12% der deutschen Bevölkerung sieht sich  
49 aufgrund ihrer Rückenschmerzen in ihrer Lebensführung eingeschränkt.  
50  
51

52 Diese Zahlen machen chronische Rückenschmerzen zur teuersten Krankheit der westlichen  
53 Industrieländer.  
54

55 Rückenschmerzen sind also im wortwörtlichen Sinne das Volksleiden Nummer 1 – und das  
56 obwohl die körperliche Belastung der Arbeitnehmer\*innen immer geringer wird.  
57  
58

## 59 Seite 5

1  
2  
3 Zur Diagnostik chronischer Schmerzen verwendet man unter anderem spezifische  
4 Schmerzfragebögen, die die Schmerzintensität, -qualität und -lokalisation erfassen. Weiterhin  
5 wird erhoben, wie stark die Beeinträchtigung in der alltäglichen Lebensführung durch die  
6 Schmerzen ist.  
7

8 Eine gute Diagnostik ist wichtig, da chronische Schmerzen viele Ursachen haben können, wie  
9 zum Beispiel:

10 Nervenschädigungen; Veränderungen in der knöchernen Struktur; psychische Belastungen;  
11 Entzündungen; muskuläre Prozesse und weitere.  
12  
13  
14

## 15 Seite 6

16 Abgesehen davon, dass chronische Schmerzen ein hohes Maß an körperlichen Unbehagen  
17 verursachen, können sie entsprechend ihrer vielseitigen Ursachen, sehr unterschiedliche  
18 psycho-soziale Folgen haben.  
19

20 Diese reichen von einem andauernden Gefühl der körperlichen Unsicherheit;  
21 Einschränkungen der Bewegungsfreiheit und des Autonomiegefühls bis hin zu einem  
22 verringerten Selbstwert- oder Kontrollgefühl. Auch Schlafstörungen sind eine häufige Folge  
23 chronischer Schmerzen.  
24  
25

26 Aufgrund des hohen Leidensdruck betroffener Patient\*innen, ist eine gut eingebundene  
27 Behandlung der Schmerzen von hoher Wichtigkeit.  
28  
29

## 30 Seite 7

31 Ganz allgemein wird eine multimodale Behandlung empfohlen, also eine Behandlung die von  
32 verschiedenen Gruppen von Behandler\*innen durchgeführt wird.  
33  
34

35 Ärzt\*innen untersuchen dabei, welche körperlichen Ursachen die Schmerzen erklären können  
36 und stehen Patient\*innen für die medizinische Behandlung zur Seite.  
37

38 Physiotherapeut\*innen können Bewegungsübungen mit den Patient\*innen einüben, die sie im  
39 Alltag z. B. mobiler machen können.  
40

41 Und Psychotherapeut\*innen erarbeiten Möglichkeiten, die Lebensqualität der Schmerz-  
42 Patient\*innen zu verbessern.  
43

44 Die Therapiekonzepte für die Behandlung chronischer Schmerzen haben sich in den letzten  
45 Jahren stetig weiterentwickelt. Die multimodale Einbindung der Patient\*innen in die  
46 unterschiedlichen Behandlungsgruppen bleibt aber ein zentrales Konzept.  
47  
48  
49  
50

51 English translation

## 52 Page 0

53 Chronic pain

## 54 Page 1

55 This video is about chronic pain: what it is and what causes it; how prevalent it is in the  
56 population; and what treatment options are available.  
57  
58  
59  
60

**Page 2**

Chronic pain is defined as pain that lasts longer than 6 months.

Chronic pain can occur in all regions of the body. However, it occurs by far most frequently in the back. But chronic headaches and joint pain are not uncommon either.

**Page 3**

Chronic pain is widespread in the population:

Out of 900 patients\* in outpatient medical practices, 327 have chronic pain - this corresponds to over 36% of patients. In total, 12 to 15 million people in Germany suffer from persistent or recurring pain. Pain often leads to persistent restrictions in their work or private life.

Back pain in particular is a major problem.

**Page 4**

Back pain in general and chronic back pain in particular are the most common reason for lost work days. More than 12% of the German population feels that their lifestyle is restricted because of their back pain.

These figures make chronic back pain the most expensive disease in Western industrialized countries.

Back pain is therefore literally the number one health problem among the population - despite the fact that the amount of physical strain on employees keeps dropping.

**Page 5**

To diagnose chronic pain, specific pain questionnaires are used that record pain intensity, quality and location. The extent to which the pain interferes with everyday life is also assessed.

A good diagnosis is important, because chronic pain can have many causes, such as: nerve damage, anomalies in the bony structure, psychological stress, inflammation, muscular processes, etc.

**Page 6**

Apart from the fact that chronic pain causes such physical discomfort, it can have very different psycho-social consequences according to its multifaceted causes.

These range from a persistent feeling of physical insecurity; restrictions in freedom of movement and sense of autonomy; to a diminished sense of self-worth or control. Sleep disturbances are also a frequent consequence of chronic pain.

Due to the high level of suffering of affected patients, well-integrated pain therapy is essential.

**Page 7**

In general, a multimodal treatment is recommended, i.e. a treatment carried out by different groups of practitioners.

1  
2  
3 Physicians investigate the physical causes of the pain and assist patients with medical  
4 treatment.  
5

6 Physiotherapists can practice movement exercises with patients that can enhance their  
7 mobility in everyday life, for example.  
8

9 And psychotherapists work out ways to improve the quality of life of pain patients.  
10

11 Therapy concepts for treating chronic pain continue to develop. However, the multimodal  
12 integration of patients within various treatment groups remains a central concept.  
13  
14  
15  
16  
17  
18  
19  
20  
21  
22  
23  
24  
25  
26  
27  
28  
29  
30  
31  
32  
33  
34  
35  
36  
37  
38  
39  
40  
41  
42  
43  
44  
45  
46  
47  
48  
49  
50  
51  
52  
53  
54  
55  
56  
57  
58  
59  
60

## SUPPLEMENTARY MATERIAL

### Student results

Student demographic characteristics

Demographic data of the students can be found in table 3.

**Table 3.** Demographic characteristics of the student sample

| Variables           | Experimental Group | Control Group |
|---------------------|--------------------|---------------|
| Age                 | 23.53 (3.10)       | 23.37 (2.91)  |
| Number (% female)   | 49 (73.47)         | 52 (76.92)    |
| Study time in years | 3.00 (1.69)        | 2.99 (1.49)   |

Results of the repeated-measures ANOVA among students

#### Acceptance

Student's acceptance could be increased as a result of the video. The 2 x 2 ANOVA revealed a significant main effect of time ( $F(1, 99)=88.95, p<.001, \eta_p^2=.48$ ) as well as a significant time x condition interaction ( $F(1, 99)=15.17, p<.001, \eta_p^2=.13$ ). There was no significant main effect of condition ( $F(1, 99)=1.61, p=.21, \eta_p^2=.02$ ). Table 4 shows the descriptive values of the sample.

**Table 4.** Descriptive representation of the acceptance values.

| Measurement time | Condition | $M^a$ | $SD$ |
|------------------|-----------|-------|------|
| Pre values       | EG        | 9.94  | 2.54 |
|                  | CG        | 9.98  | 2.42 |
| Post values      | EG        | 12.10 | 2.24 |
|                  | CG        | 10.88 | 2.62 |

*Notes.* <sup>a</sup>Values range between 3 and 15;  $M$  = Mean;  $SD$  = Standard deviation; EG = Experimental Group; CG = Control Group.

#### Performance Expectancy

We found a similar pattern of results for performance expectancy. There was a significant effect of time ( $F(1, 99)=81.96, p<.001, \eta_p^2=.45$ ) and a significant time x condition interaction ( $F(1, 99)=10.14, p=.002, \eta_p^2=.09$ ). The main effect of condition got not significant ( $F(1, 99)=1.17, p=.28, \eta_p^2=0.1$ ). Table 5 shows the descriptive values of the sample.

**Table 5.** Descriptive representation of the performance expectancy values.

| Measurement time | Condition       | $M^{ab}$ | $SD^c$ |
|------------------|-----------------|----------|--------|
| Pre values       | EG <sup>d</sup> | 9.86     | 2.57   |
|                  | CG <sup>e</sup> | 9.98     | 2.26   |
| Post values      | EG              | 12.14    | 2.02   |
|                  | CG              | 11.08    | 2.61   |

*Notes.* <sup>a</sup>Values range between 3 and 15;  $M$  = Mean;  $SD$  = Standard deviation; EG = Experimental Group; CG = Control Group.

### *Credibility*

The pattern of results for credibility reflects the above as well. We found a significant main effect of time ( $F(1, 99)=149.72, p<.001, \eta_p^2=.60$ ) and a significant time x condition effect ( $F(1, 99)=25.99, p<.001, \eta_p^2=.21$ ). We found no significant main effect of condition ( $F(1, 99)=2.45, p=.12, \eta_p^2=.02$ ). Table 6 shows the descriptive values of the sample.

**Table 6.** Descriptive representation of the credibility values.

| Measurement time | Condition       | $M^{ab}$ | $SD^c$ |
|------------------|-----------------|----------|--------|
| Pre values       | EG <sup>d</sup> | 5.43     | 1.48   |
|                  | CG <sup>e</sup> | 5.53     | 1.37   |
| Post values      | EG              | 7.16     | 1.26   |
|                  | CG              | 6.24     | 1.44   |

*Notes.* <sup>a</sup>Values range between 1 and 10;  $M$  = Mean;  $SD$  = Standard deviation; EG = Experimental Group; CG = Control Group.

## SUPPLEMENTARY MATERIAL

### Summary of linear regression

**Table 7.** Summary of linear regression predicting acceptance towards pain apps.

| Predictor                                       | <i>B</i> | <i>SE</i> <sup>a</sup> | $\beta$ | <i>t</i> | <i>p</i> |
|-------------------------------------------------|----------|------------------------|---------|----------|----------|
| Block 1                                         |          |                        |         |          |          |
| Age                                             | -.01     | .01                    | -.03    | -.73     | .47      |
| Sex                                             | .09      | .26                    | .01     | .36      | .72      |
| Daily Smartphone time                           | -.01     | .20                    | -.002   | -.04     | .96      |
| Professional smartphone use                     | .18      | .11                    | .06     | 1.63     | .10      |
| Block 2                                         |          |                        |         |          |          |
| Scepticism and Perception of Risks <sup>b</sup> | -.82     | .20                    | -.18    | -4.13    | >.001    |
| Openness <sup>c</sup>                           | .19      | .16                    | .05     | 1.17     | .25      |
| Intuitive Appeal <sup>c</sup>                   | .432     | .20                    | .11     | 2.15     | .03      |
| Credibility <sup>d</sup>                        | .64      | .11                    | .34     | 5.71     | >.001    |
| Block 3                                         |          |                        |         |          |          |
| Performance Expectancy                          | .34      | .07                    | .30     | 5.32     | >.001    |
| Effort Expectancy                               | .07      | .07                    | .05     | 1.00     | .32      |
| Social Influence                                | -.06     | .07                    | -.03    | -.77     | .44      |
| Facilitating Conditions                         | -.001    | .08                    | .00     | -.01     | .99      |

*Notes.* <sup>a</sup>Standard error; <sup>b</sup>Attitudes toward Psychological Online Interventions questionnaire; <sup>c</sup>Evidence-based Practice Attitude Scale-36; <sup>d</sup>Credibility/Expectancy Questionnaire.





## CONSORT 2010 checklist of information to include when reporting a randomised trial\*

| Section/Topic                    | Item No | Checklist item                                                                                                                                                                              | Reported on page No |
|----------------------------------|---------|---------------------------------------------------------------------------------------------------------------------------------------------------------------------------------------------|---------------------|
| <b>Title and abstract</b>        |         |                                                                                                                                                                                             |                     |
|                                  | 1a      | Identification as a randomised trial in the title                                                                                                                                           | 1                   |
|                                  | 1b      | Structured summary of trial design, methods, results, and conclusions (for specific guidance see CONSORT for abstracts)                                                                     | 2                   |
| <b>Introduction</b>              |         |                                                                                                                                                                                             |                     |
| Background and objectives        | 2a      | Scientific background and explanation of rationale                                                                                                                                          | 3                   |
|                                  | 2b      | Specific objectives or hypotheses                                                                                                                                                           | 4                   |
| <b>Methods</b>                   |         |                                                                                                                                                                                             |                     |
| Trial design                     | 3a      | Description of trial design (such as parallel, factorial) including allocation ratio                                                                                                        | 4                   |
|                                  | 3b      | Important changes to methods after trial commencement (such as eligibility criteria), with reasons                                                                                          | -                   |
| Participants                     | 4a      | Eligibility criteria for participants                                                                                                                                                       | 4                   |
|                                  | 4b      | Settings and locations where the data were collected                                                                                                                                        | 4                   |
| Interventions                    | 5       | The interventions for each group with sufficient details to allow replication, including how and when they were actually administered                                                       | 5                   |
| Outcomes                         | 6a      | Completely defined pre-specified primary and secondary outcome measures, including how and when they were assessed                                                                          | 5                   |
|                                  | 6b      | Any changes to trial outcomes after the trial commenced, with reasons                                                                                                                       | -                   |
| Sample size                      | 7a      | How sample size was determined                                                                                                                                                              | 4                   |
|                                  | 7b      | When applicable, explanation of any interim analyses and stopping guidelines                                                                                                                | -                   |
| <b>Randomisation:</b>            |         |                                                                                                                                                                                             |                     |
| Sequence generation              | 8a      | Method used to generate the random allocation sequence                                                                                                                                      | 4                   |
|                                  | 8b      | Type of randomisation; details of any restriction (such as blocking and block size)                                                                                                         | -                   |
| Allocation concealment mechanism | 9       | Mechanism used to implement the random allocation sequence (such as sequentially numbered containers), describing any steps taken to conceal the sequence until interventions were assigned |                     |
| Implementation                   | 10      | Who generated the random allocation sequence, who enrolled participants, and who assigned participants to interventions                                                                     | 4                   |
| Blinding                         | 11a     | If done, who was blinded after assignment to interventions (for example, participants, care providers, those                                                                                | -                   |

|    |                          |                                                                                                                     |    |
|----|--------------------------|---------------------------------------------------------------------------------------------------------------------|----|
| 1  |                          | assessing outcomes) and how                                                                                         |    |
| 2  |                          | 11b If relevant, description of the similarity of interventions                                                     | 7  |
| 3  | Statistical methods      | 12a Statistical methods used to compare groups for primary and secondary outcomes                                   | 7  |
| 4  |                          | 12b Methods for additional analyses, such as subgroup analyses and adjusted analyses                                | 7  |
| 5  |                          |                                                                                                                     |    |
| 6  | <b>Results</b>           |                                                                                                                     |    |
| 7  | Participant flow (a      | 13a For each group, the numbers of participants who were randomly assigned, received intended treatment, and        |    |
| 8  | diagram is strongly      | were analysed for the primary outcome                                                                               | 8  |
| 9  | recommended)             | 13b For each group, losses and exclusions after randomisation, together with reasons                                | 8  |
| 10 | Recruitment              | 14a Dates defining the periods of recruitment and follow-up                                                         | 4  |
| 11 |                          | 14b Why the trial ended or was stopped                                                                              | -  |
| 12 | Baseline data            | 15 A table showing baseline demographic and clinical characteristics for each group                                 | 8  |
| 13 | Numbers analysed         | 16 For each group, number of participants (denominator) included in each analysis and whether the analysis was      |    |
| 14 |                          | by original assigned groups                                                                                         | 7  |
| 15 | Outcomes and             | 17a For each primary and secondary outcome, results for each group, and the estimated effect size and its           |    |
| 16 | estimation               | precision (such as 95% confidence interval)                                                                         | 7  |
| 17 |                          | 17b For binary outcomes, presentation of both absolute and relative effect sizes is recommended                     | -  |
| 18 | Ancillary analyses       | 18 Results of any other analyses performed, including subgroup analyses and adjusted analyses, distinguishing       |    |
| 19 |                          | pre-specified from exploratory                                                                                      | -  |
| 20 | Harms                    | 19 All important harms or unintended effects in each group (for specific guidance see CONSORT for harms)            | -  |
| 21 |                          |                                                                                                                     |    |
| 22 | <b>Discussion</b>        |                                                                                                                     |    |
| 23 | Limitations              | 20 Trial limitations, addressing sources of potential bias, imprecision, and, if relevant, multiplicity of analyses | 13 |
| 24 | Generalisability         | 21 Generalisability (external validity, applicability) of the trial findings                                        | 13 |
| 25 | Interpretation           | 22 Interpretation consistent with results, balancing benefits and harms, and considering other relevant evidence    | 11 |
| 26 |                          |                                                                                                                     |    |
| 27 | <b>Other information</b> |                                                                                                                     |    |
| 28 | Registration             | 23 Registration number and name of trial registry                                                                   | 3  |
| 29 | Protocol                 | 24 Where the full trial protocol can be accessed, if available                                                      | -  |
| 30 | Funding                  | 25 Sources of funding and other support (such as supply of drugs), role of funders                                  | 14 |

36  
37 \*We strongly recommend reading this statement in conjunction with the CONSORT 2010 Explanation and Elaboration for important clarifications on all the items. If relevant, we also  
38 recommend reading CONSORT extensions for cluster randomised trials, non-inferiority and equivalence trials, non-pharmacological treatments, herbal interventions, and pragmatic trials.  
39 Additional extensions are forthcoming: for those and for up to date references relevant to this checklist, see [www.consort-statement.org](http://www.consort-statement.org).  
40  
41  
42
