# Supplementary material for: Effects of a video intervention on physicians’ acceptance of pain apps: a randomised controlled trial
Source: PubMed Central journal article supplement — BMJ Open. 2022 Apr 25;12(4):e060020. doi: 10.1136/bmjopen-2021-060020 (PMC9039411; doi:10.1136/bmjopen-2021-060020), 2022-04-25
Supplement: bmjopen-2021-060020supp001.pdf [file bmjopen-2021-060020supp001.pdf]

## SUPPLEMENTARY MATERIAL

### Transcripts and English translations of the video interventions

German transcript of the health app-video

#### Seite 0

Gesundheits-Apps für chronische Schmerzpatient\*innen

#### Seite 1

In diesem Video geht es um Gesundheits-Apps für chronische Schmerzpatient\*innen. Darum, was sie sind, welchen Nutzen Patient\*innen aus ihnen ziehen können und wie der aktuelle Wissenschaftsstand zu ihrer Wirksamkeit aussieht.

#### Seite 2

Ende des Jahres 2019 trat das „Digitale Versorgungs-Gesetz“ in Kraft. Es ermöglicht Ärztinnen und Ärzten ihren Patient\*innen zertifizierte Gesundheits-Apps auf Rezept zu verschreiben.

#### Seite 3

Das Einsatzgebiet von Gesundheits-Apps ist vielfältig.

Sie können etwa nach einem klinischen Aufenthalt zur Nachsorge oder in der ambulanten Versorgung als Therapiebegleitung eingesetzt werden.

Gerade bei chronischen Schmerzen erscheinen Gesundheits-Apps sinnvoll. Sie stehen Patient\*innen jederzeit bei der Bewältigung ihrer Beschwerden zur Verfügung und können beispielsweise bei einem Schmerzschub direkt zur Hand genommen werden.

#### Seite 4

Ziele solcher Apps sind vor allem der Aufbau und die Aufrechterhaltung von Bewältigungsstrategien für den Umgang mit Schmerzen.

Sie können Patient\*innen dabei unterstützen, hinsichtlich ihrer Gesundheitsziele am Ball zu bleiben und ihre mit ihrer Ärztin oder ihrem Arzt vereinbarten Vorsätze zu erreichen. Das kann mittels einer Erinnerungsfunktion, aufgestellten Bewegungsplänen oder ähnlichen geschehen.

Weiterhin können Schmerztagebücher geführt werden, die Patient\*in und Behandler\*in einen visuellen Überblick über den Schmerzverlauf geben.

Darüber hinaus helfen Gesundheits-Apps Patient\*innen dabei, körperliche Übungen durchzuführen – beispielsweise mit unterstützenden Videos.

Sie können auch einen Überblick über die aktuelle Medikation geben. Ebenfalls hilfreich sind vertiefende Hintergrundinformationen, geleitete Entspannungsverfahren oder eine Schritt für Schritt durchgeführte gedankliche Neubewertung der Schmerzsymptome.

#### Seite 5

Mittlerweile gibt es eine ganze Reihe von Studien, die sich mit der Wirksamkeit von Gesundheits-Apps befassen haben.

**Seite 6**

Bereits 2013 zeigten Parker und Kollegen, dass auch ältere, technisch weniger versierte, Patient\*innen an der Nutzung von Gesundheits-Apps zur Unterstützung ihrer Krankheitsbewältigung interessiert sind.

**Seite 7**

Eine Studie aus Norwegen zeigt, dass Patient\*innen, die zusätzlich zur ärztlichen Behandlung eine Smartphone-Intervention nutzten, ihre chronischen Schmerzen eher akzeptieren können und weniger negative Gedanken ihnen gegenüber haben.

**Seite 8**

Toelle und Kollegen zeigten 2019, dass die Behandlung mit einer Gesundheits-App zu einer geringeren Schmerzintensität führt.

**Seite 9**

Weitere Studien zeigen, dass Patient\*innen, die zusätzlich zu ihrer Behandlung Gesundheits-Apps nutzen, zufriedener mit ihrer Behandlung sind... ihren Alltag aktiver gestalten... und ein effektiveres Selbstmanagement haben.

**Seite 10**

Neben diesen Ergebnissen gibt es viele weitere Studien, die sich mit Gesundheits-Apps auseinandersetzen und unser Wissen zu diesem Thema erweitern.

**Seite 11**

Auch wenn es weiterer Forschung bedarf, um das Wirksamkeitspotential von Gesundheits-Apps abschließend einschätzen zu können, sind die bisherigen Studienergebnisse sehr vielversprechend.

Wichtig dabei ist, dass Apps in eine Behandlung eingebunden werden und diese nicht ersetzen sollen.

Ist das gegeben können Apps eine wertvolle Therapiebereicherung sein.

English translation

**Page 0**

Health apps for chronic pain patients

**Page 1**

This video is about health apps for chronic pain patients: what they are, how patients can benefit from them, and what the current state of science is regarding their effectiveness.

**Page 2**

At the end of 2019, the "Digital Care Act" came into force. It enables doctors to prescribe certified health apps to their patients.

**Page 3**

Health apps can be used in a variety of ways.

For example, they can be used after a clinical stay for follow-up care or in outpatient care as therapy support.

In the case of chronic pain in particular, health apps seem to be useful. They are available to patients at any time to help them cope with their symptoms and can, for example, help immediately in the event of a pain attack.

#### **Page 4**

The main aim of such apps is to establish and maintain coping strategies for dealing with pain.

They can help patients stay on track with their health goals and achieve the resolutions they have agreed on with their doctor. This can be done via a reminder function, established exercise plans, or similar.

Furthermore, pain diaries can be used to give patients and doctors a visual overview of their patient's pain course.

In addition, health apps help patients do physical exercises - for example, through supporting videos.

They can also provide an overview of current medication. Other helpful features include in-depth background information, guided relaxation procedures, or a step-by-step mental re-evaluation of pain symptoms.

#### **Page 5**

Quite a few studies have investigated the effectiveness of health apps.

#### **Page 6**

As early as 2013, Parker and colleagues showed that older, less tech-savvy patients are interested in using health apps to assist with their disease management.

#### **Page 7**

A study from Norway showed that patients who used a smartphone intervention in addition to medical treatment were more likely to accept their chronic pain and have fewer negative thoughts about it.

#### **Page 8**

Toelle and colleagues showed in 2019 that treatment with a health app led to lower pain intensity.

#### **Page 9**

Other studies show that patients who use health apps in addition to their treatment are more satisfied with their treatment... are more active in their daily lives... and have more effective self-management.

#### **Page 10**

In addition to these findings, many other studies have addressed health apps and deepened our knowledge on this topic.

#### **Page 11**

Although more research is needed to conclusively assess the potential effectiveness of health apps, the study results to date are very promising.

It is important to note that apps should be integrated within treatment and not replace it.

If that is the case, apps can be a valuable supplement to therapy.

German transcript of the control-video

#### **Seite 0**

Chronische Schmerzen

#### **Seite 1**

In diesem Video geht es um chronische Schmerzen: Was sie sind und welche Ursachen sie haben; wie stark ihre Verbreitung in der Bevölkerung ist und welche Behandlungsmöglichkeiten es gibt.

#### **Seite 2**

Von chronischen Schmerzen wird gesprochen, sobald man länger als 6 Monate anhaltende Schmerzen hat.

Chronische Schmerzen können in allen Körperregionen entstehen. Mit Abstand am häufigsten treten sie jedoch im Rücken auf. Aber auch chronische Kopf- oder Gelenkschmerzen sind keine Seltenheit.

#### **Seite 3**

In der Bevölkerung sind chronische Schmerzen weit verbreitet:

Von 900 Patient\*innen in ambulanten Arztpraxen haben 327 chronische Schmerzen – das entspricht über 36% der Patient\*innen. Insgesamt leiden 12 bis 15 Millionen Menschen in Deutschland an anhaltenden oder wiederkehrenden Schmerzen. Häufig führen Schmerzen zu anhaltenden Einschränkungen ihres Arbeits- oder Privatlebens.

Gerade Rückenschmerzen stellen ein zentrales Problem dar.

#### **Seite 4**

Rückenschmerzen im Allgemeinen und chronische Rückenschmerzen im Speziellen sind der häufigste Grund für Arbeitsausfälle. Über 12% der deutschen Bevölkerung sieht sich aufgrund ihrer Rückenschmerzen in ihrer Lebensführung eingeschränkt.

Diese Zahlen machen chronische Rückenschmerzen zur teuersten Krankheit der westlichen Industrieländer.

Rückenschmerzen sind also im wortwörtlichen Sinne das Volksleiden Nummer 1 – und das obwohl die körperliche Belastung der Arbeitnehmer\*innen immer geringer wird.

#### **Seite 5**

Zur Diagnostik chronischer Schmerzen verwendet man unter anderem spezifische Schmerzfragebögen, die die Schmerzintensität, -qualität und -lokalisation erfassen. Weiterhin wird erhoben, wie stark die Beeinträchtigung in der alltäglichen Lebensführung durch die Schmerzen ist.

Eine gute Diagnostik ist wichtig, da chronische Schmerzen viele Ursachen haben können, wie zum Beispiel:

Nervenschädigungen; Veränderungen in der knöchernen Struktur; psychische Belastungen; Entzündungen; muskuläre Prozesse und weitere.

## Seite 6

Abgesehen davon, dass chronische Schmerzen ein hohes Maß an körperlichen Unbehagen verursachen, können sie entsprechend ihrer vielseitigen Ursachen, sehr unterschiedliche psycho-soziale Folgen haben.

Diese reichen von einem andauernden Gefühl der körperlichen Unsicherheit; Einschränkungen der Bewegungsfreiheit und des Autonomiegefühls bis hin zu einem verringerten Selbstwert- oder Kontrollgefühl. Auch Schlafstörungen sind eine häufige Folge chronischer Schmerzen.

Aufgrund des hohen Leidensdruck betroffener Patient\*innen, ist eine gut eingebundene Behandlung der Schmerzen von hoher Wichtigkeit.

## Seite 7

Ganz allgemein wird eine multimodale Behandlung empfohlen, also eine Behandlung die von verschiedenen Gruppen von Behandler\*innen durchgeführt wird.

Ärzt\*innen untersuchen dabei, welche körperlichen Ursachen die Schmerzen erklären können und stehen Patient\*innen für die medizinische Behandlung zur Seite.

Physiotherapeut\*innen können Bewegungsübungen mit den Patient\*innen einüben, die sie im Alltag z. B. mobiler machen können.

Und Psychotherapeut\*innen erarbeiten Möglichkeiten, die Lebensqualität der Schmerz-Patient\*innen zu verbessern.

Die Therapiekonzepte für die Behandlung chronischer Schmerzen haben sich in den letzten Jahren stetig weiterentwickelt. Die multimodale Einbindung der Patient\*innen in die unterschiedlichen Behandlungsgruppen bleibt aber ein zentrales Konzept.

English translation

## Page 0

Chronic pain

## Page 1

This video is about chronic pain: what it is and what causes it; how prevalent it is in the population; and what treatment options are available.

**Page 2**

Chronic pain is defined as pain that lasts longer than 6 months.

Chronic pain can occur in all regions of the body. However, it occurs by far most frequently in the back. But chronic headaches and joint pain are not uncommon either.

**Page 3**

Chronic pain is widespread in the population:

Out of 900 patients\* in outpatient medical practices, 327 have chronic pain - this corresponds to over 36% of patients. In total, 12 to 15 million people in Germany suffer from persistent or recurring pain. Pain often leads to persistent restrictions in their work or private life.

Back pain in particular is a major problem.

**Page 4**

Back pain in general and chronic back pain in particular are the most common reason for lost work days. More than 12% of the German population feels that their lifestyle is restricted because of their back pain.

These figures make chronic back pain the most expensive disease in Western industrialized countries.

Back pain is therefore literally the number one health problem among the population - despite the fact that the amount of physical strain on employees keeps dropping.

**Page 5**

To diagnose chronic pain, specific pain questionnaires are used that record pain intensity, quality and location. The extent to which the pain interferes with everyday life is also assessed.

A good diagnosis is important, because chronic pain can have many causes, such as:

nerve damage, anomalies in the bony structure, psychological stress, inflammation, muscular processes, etc.

**Page 6**

Apart from the fact that chronic pain causes such physical discomfort, it can have very different psycho-social consequences according to its multifaceted causes.

These range from a persistent feeling of physical insecurity; restrictions in freedom of movement and sense of autonomy; to a diminished sense of self-worth or control. Sleep disturbances are also a frequent consequence of chronic pain.

Due to the high level of suffering of affected patients, well-integrated pain therapy is essential.

**Page 7**

In general, a multimodal treatment is recommended, i.e. a treatment carried out by different groups of practitioners.

Physicians investigate the physical causes of the pain and assist patients with medical treatment.

Physiotherapists can practice movement exercises with patients that can enhance their mobility in everyday life, for example.

And psychotherapists work out ways to improve the quality of life of pain patients.

Therapy concepts for treating chronic pain continue to develop. However, the multimodal integration of patients within various treatment groups remains a central concept.
