# Supplementary material for: Effects of a video intervention on physicians’ acceptance of pain apps: a randomised controlled trial
Source: PubMed Central journal article supplement — BMJ Open. 2022 Apr 25;12(4):e060020. doi: 10.1136/bmjopen-2021-060020 (PMC9039411; doi:10.1136/bmjopen-2021-060020), 2022-04-25
Supplement: bmjopen-2021-060020supp002.pdf [file bmjopen-2021-060020supp002.pdf]

## SUPPLEMENTARY MATERIAL

### Student results

Student demographic characteristics

Demographic data of the students can be found in table 3.

**Table 3.** Demographic characteristics of the student sample

| Variables           | Experimental Group | Control Group |
|---------------------|--------------------|---------------|
| Age                 | 23.53 (3.10)       | 23.37 (2.91)  |
| Number (% female)   | 49 (73.47)         | 52 (76.92)    |
| Study time in years | 3.00 (1.69)        | 2.99 (1.49)   |

Results of the repeated-measures ANOVA among students

#### Acceptance

Student's acceptance could be increased as a result of the video. The 2 x 2 ANOVA revealed a significant main effect of time ( $F(1, 99)=88.95, p<.001, \eta_p^2=.48$ ) as well as a significant time x condition interaction ( $F(1, 99)=15.17, p<.001, \eta_p^2=.13$ ). There was no significant main effect of condition ( $F(1, 99)=1.61, p=.21, \eta_p^2=.02$ ). Table 4 shows the descriptive values of the sample.

**Table 4.** Descriptive representation of the acceptance values.

| Measurement time | Condition | $M^a$ | $SD$ |
|------------------|-----------|-------|------|
| Pre values       | EG        | 9.94  | 2.54 |
|                  | CG        | 9.98  | 2.42 |
| Post values      | EG        | 12.10 | 2.24 |
|                  | CG        | 10.88 | 2.62 |

*Notes.* <sup>a</sup>Values range between 3 and 15;  $M$  = Mean;  $SD$  = Standard deviation; EG = Experimental Group; CG = Control Group.

#### Performance Expectancy

We found a similar pattern of results for performance expectancy. There was a significant effect of time ( $F(1, 99)=81.96, p<.001, \eta_p^2=.45$ ) and a significant time x condition interaction ( $F(1, 99)=10.14, p=.002, \eta_p^2=.09$ ). The main effect of condition got not significant ( $F(1, 99)=1.17, p=.28, \eta_p^2=0.1$ ). Table 5 shows the descriptive values of the sample.

**Table 5.** Descriptive representation of the performance expectancy values.

| Measurement time | Condition       | <i>M</i> <sup>ab</sup> | <i>SD</i> <sup>c</sup> |
|------------------|-----------------|------------------------|------------------------|
| Pre values       | EG <sup>d</sup> | 9.86                   | 2.57                   |
|                  | CG <sup>e</sup> | 9.98                   | 2.26                   |
| Post values      | EG              | 12.14                  | 2.02                   |
|                  | CG              | 11.08                  | 2.61                   |

*Notes.* <sup>a</sup>Values range between 3 and 15; *M* = Mean; *SD* = Standard deviation; EG = Experimental Group; CG = Control Group.

### *Credibility*

The pattern of results for credibility reflects the above as well. We found a significant main effect of time ( $F(1, 99)=149.72, p<.001, \eta_p^2=.60$ ) and a significant time x condition effect ( $F(1, 99)=25.99, p<.001, \eta_p^2=.21$ ). We found no significant main effect of condition ( $F(1, 99)=2.45, p=.12, \eta_p^2=.02$ ). Table 6 shows the descriptive values of the sample.

**Table 6.** Descriptive representation of the credibility values.

| Measurement time | Condition       | <i>M</i> <sup>ab</sup> | <i>SD</i> <sup>c</sup> |
|------------------|-----------------|------------------------|------------------------|
| Pre values       | EG <sup>d</sup> | 5.43                   | 1.48                   |
|                  | CG <sup>e</sup> | 5.53                   | 1.37                   |
| Post values      | EG              | 7.16                   | 1.26                   |
|                  | CG              | 6.24                   | 1.44                   |

*Notes.* <sup>a</sup>Values range between 1 and 10; *M* = Mean; *SD* = Standard deviation; EG = Experimental Group; CG = Control Group.
