# Supplementary material for: Effects of a video intervention on physicians’ acceptance of pain apps: a randomised controlled trial
Source: PubMed Central journal article supplement — BMJ Open. 2022 Apr 25;12(4):e060020. doi: 10.1136/bmjopen-2021-060020 (PMC9039411; doi:10.1136/bmjopen-2021-060020), 2022-04-25
Supplement: bmjopen-2021-060020supp003.pdf [file bmjopen-2021-060020supp003.pdf]

## SUPPLEMENTARY MATERIAL

## Summary of linear regression

**Table 7.** Summary of linear regression predicting acceptance towards pain apps.

| Predictor                                       | <i>B</i> | <i>SE</i> <sup>a</sup> | $\beta$ | <i>t</i> | <i>p</i> |
|-------------------------------------------------|----------|------------------------|---------|----------|----------|
| Block 1                                         |          |                        |         |          |          |
| Age                                             | -.01     | .01                    | -.03    | -.73     | .47      |
| Sex                                             | .09      | .26                    | .01     | .36      | .72      |
| Daily Smartphone time                           | -.01     | .20                    | -.002   | -.04     | .96      |
| Professional smartphone use                     | .18      | .11                    | .06     | 1.63     | .10      |
| Block 2                                         |          |                        |         |          |          |
| Scepticism and Perception of Risks <sup>b</sup> | -.82     | .20                    | -.18    | -4.13    | >.001    |
| Openness <sup>c</sup>                           | .19      | .16                    | .05     | 1.17     | .25      |
| Intuitive Appeal <sup>c</sup>                   | .432     | .20                    | .11     | 2.15     | .03      |
| Credibility <sup>d</sup>                        | .64      | .11                    | .34     | 5.71     | >.001    |
| Block 3                                         |          |                        |         |          |          |
| Performance Expectancy                          | .34      | .07                    | .30     | 5.32     | >.001    |
| Effort Expectancy                               | .07      | .07                    | .05     | 1.00     | .32      |
| Social Influence                                | -.06     | .07                    | -.03    | -.77     | .44      |
| Facilitating Conditions                         | -.001    | .08                    | .00     | -.01     | .99      |

Notes. <sup>a</sup>Standard error; <sup>b</sup>Attitudes toward Psychological Online Interventions questionnaire; <sup>c</sup>Evidence-based Practice Attitude Scale-36; <sup>d</sup>Credibility/Expectancy Questionnaire.
